# Supplementary material for: Altering Charges on Heterobimetallic Transition‐Metal Carbonyl Clusters
Source: PubMed Central journal article supplement — Chemistry. 2020 Sep 11;26(54):12373–81. doi: 10.1002/chem.202002339 (PMC7589396; doi:10.1002/chem.202002339), 2020-09-11
Supplement: CHEM-26-12373-s001.pdf [file CHEM-26-12373-s001.pdf]

# Chemistry–A European Journal

Supporting Information

## **Altering Charges on Heterobimetallic Transition-Metal Carbonyl Clusters**

Wiebke Unkrig, Konstantin Kloiber, Burkhard Butschke, Daniel Kratzert, and Ingo Krossing<sup>\*[a]</sup>

## This PDF file includes:

Figs. S1 to S23 and Tables S1 to S19

|                                                                                                                                                    |    |
|----------------------------------------------------------------------------------------------------------------------------------------------------|----|
| Abbreviations .....                                                                                                                                | 1  |
| Material and Methods .....                                                                                                                         | 2  |
| Techniques and Instruments .....                                                                                                                   | 2  |
| Vibrational Spectroscopy .....                                                                                                                     | 2  |
| Single Crystal X-ray Diffraction.....                                                                                                              | 3  |
| Computational Details .....                                                                                                                        | 4  |
| Detailed Synthesis of Compounds <b>1 – 4</b> .....                                                                                                 | 5  |
| Vibrational Analysis .....                                                                                                                         | 7  |
| Full IR spectra of <b>1, 2, 3, 4</b> , [NEt <sub>4</sub> ][Nb(CO) <sub>6</sub> ] and [NEt <sub>4</sub> ][Al(OR <sup>F</sup> ) <sub>4</sub> ] ..... | 7  |
| Details of the AIM Analysis .....                                                                                                                  | 11 |
| Computational Details to the Structure Determination.....                                                                                          | 18 |
| Structural Discussions of Compounds <b>1 – 4</b> .....                                                                                             | 28 |
| Single-Crystal Diffraction Results for Compounds <b>1 – 4</b> .....                                                                                | 37 |
| Full Details to the Single-Crystal Structure Determinations .....                                                                                  | 38 |

## Abbreviations

4FB = 1,2,3,4-tetrafluorobenzene, F<sub>4</sub>C<sub>6</sub>H<sub>2</sub>

[Al(OR<sup>F</sup>)<sub>4</sub>]<sup>-</sup> = [Al{OC(CF<sub>3</sub>)<sub>3</sub>}<sub>4</sub>]<sup>-</sup>

## Compounds

**1** [NEt<sub>4</sub>]<sup>+</sup>[Ag{M(CO)<sub>6</sub>}<sub>2</sub>]<sup>-</sup>; **1**<sup>-</sup> [Ag{M(CO)<sub>6</sub>}<sub>2</sub>]<sup>-</sup>; M = Nb (**1a**), Ta (**1b**)

**2** [NEt<sub>4</sub>]<sup>+</sup>[Ag<sub>2</sub>{M(CO)<sub>6</sub>}<sub>3</sub>]<sup>-</sup>; **2**<sup>-</sup> [Ag<sub>2</sub>{M(CO)<sub>6</sub>}<sub>3</sub>]<sup>-</sup>; M = Nb (**2a**), Ta (**2b**)

**3** [Ag<sub>6</sub>{M(CO)<sub>6</sub>}<sub>5</sub>]<sup>+</sup>[Al(OR<sup>F</sup>)<sub>4</sub>]<sup>-</sup>; **3**<sup>+</sup> [Ag<sub>6</sub>{M(CO)<sub>6</sub>}<sub>5</sub>]<sup>+</sup>; M = Nb (**3a**)

**4** [Ag<sub>6</sub>{M(CO)<sub>6</sub>}<sub>4</sub>]<sup>2+</sup>[Al(OR<sup>F</sup>)<sub>4</sub>]<sup>-2</sup>; **4**<sup>2+</sup> [Ag<sub>6</sub>{M(CO)<sub>6</sub>}<sub>4</sub>]<sup>2+</sup>; M = Nb (**4a**), Ta (**4b**)

## Material and Methods

The methods and techniques established in our group were used <sup>[1]</sup>. Due to minor deviations, however, these were described again in detail here.

### Techniques and Instruments

All reactions were carried out in an inert atmosphere using standard vacuum and Schlenk techniques and a glovebox filled with Ar or N<sub>2</sub>. Special double-Schlenk flasks <sup>[2]</sup> separated by a G3 or G4 frit and sealed with grease-free teflon or glass valves were used for most of the manipulations. Pentane was dried using a conventional MBraun Grubbs apparatus, while 1,2,3,4-tetrafluorobenzene (F<sub>4</sub>C<sub>6</sub>H<sub>2</sub>, 4FB, Fluorochem) was dried over CaH<sub>2</sub> and distilled afterwards. Besides the general practice, 4FB was stirred for 24h with Ag[Al(OR<sup>F</sup>)<sub>4</sub>] at room temperature to remove traces of benzene and other fluorobenzenes and condensed subsequently. Consequently, the solvent was contaminated with HOC(CF<sub>3</sub>)<sub>3</sub>, but as the alcohol is formed in low quantity (<<1 %) in each reaction anyway, it had no influence to the reaction. All solvents were degassed before used and stored over molecular sieves (4 Å). [NEt<sub>4</sub>]<sup>+</sup>[M(CO)<sub>6</sub>]<sup>-</sup> (M = Nb, Ta) and Ag[Al(OR<sup>F</sup>)<sub>4</sub>] (commercially available at [www.iolitec.de](http://www.iolitec.de)) were synthesized according to literature <sup>[3]</sup>.

### Vibrational Spectroscopy

IR spectra (range: 4000-550 cm<sup>-1</sup>, resolution: 2 cm<sup>-1</sup>, 64 scans) were recorded in the glovebox on a Bruker ALPHA FT-IR spectrometer equipped with an Eco-ZnSe-ATR module. The ATR attachment of FT-IR spectrometer was precooled prior to the measurements. The Bruker OPUS 7.5.18 software was used to collect, evaluate and edit the vibrational spectra. Unless otherwise noted, the spectra were baseline corrected (default parameters, 1 iteration). All IR spectra were normalized to 1 and intensities are given as follows: vw = very weak (< 0.2), w = weak (< 0.4), m = medium (< 0.6), s = strong (< 0.8), vs = very strong (≥ 0.8), sh = shoulder, br = broad. Graphical representations were visualized with OPUS or OriginPro (version 9.2). Only bands that can be assigned to the desired products, the co-product or solvents were detected. Bands caused by the co-product [NEt<sub>4</sub>]<sup>+</sup>[Al(OR<sup>F</sup>)<sub>4</sub>]<sup>-</sup> or solvents are given below.

#### [NEt<sub>4</sub>]<sup>+</sup>[Al(OR<sup>F</sup>)<sub>4</sub>]<sup>-</sup>:

FTIR (ZnSe):  $\nu$  [cm<sup>-1</sup>] = 3018 (vw), 3012 (vw), 3000 (vw), 1487 (vw), 1458 (vw), 1444 (vw), 1399 (vw), 1352 (w), 1297 (w), 1272 (s), 1249 (m), 1240 (s), 1209 (vs), 1161 (s), 1068 (vw), 1052 (vw), 998 (vw), 969 (vs), 832 (w), 782 (vw), 756 (vw), 726 (vs), 636 (vw), 571 (vw), 561 (w).

### 1,2,3,4-F<sub>4</sub>C<sub>6</sub>H<sub>2</sub>:

FTIR (ZnSe):  $\nu$  [cm<sup>-1</sup>] = 3097 (vw), 2310 (vw), 1845 (vw), 1792 (vw), 1728 (vw), 1633 (vw), 1609 (vw), 1507 (vs), 1438 (vw), 1398 (vw), 1327 (w), 1313 (vw), 1266 (vw), 1236 (m), 1160 (w), 1093 (vw), 1045 (s), 982 (vs), 962 (w), 861 (vw), 800 (m), 745 (m), 729 (vw), 681 (m), 604 (vw), 593 (w).

### [NEt<sub>4</sub>][Nb(CO)<sub>6</sub>]:

FTIR (ZnSe):  $\nu$  [cm<sup>-1</sup>] = 3865 (vw), 3845 (vw), 3731 (vw), 3696 (vw), 3015 (vw), 2998 (vw), 2984 (vw), 2954 (vw), 1805 (vs), 1520 (vw), 1514 (vw), 1481 (w), 1470 (w), 1450 (w), 1431 (w), 1387 (vw), 1374 (vw), 1363 (vw), 1330 (vw), 1285 (vw), 1278 (vw), 1272 (vw), 1184 (vw), 1169 (w), 1113 (vw), 1092 (vw), 1067 (vw), 1050 (vw), 1016 (vw), 992 (w), 930 (vw), 903 (w), 888 (vw), 850 (vw), 823 (w), 779 (m), 751 (w), 722 (vw), 701 (vw), 690 (vw), 665 (vw), 638 (vw), 632 (vw), 620 (vw).

### [NEt<sub>4</sub>][Ta(CO)<sub>6</sub>]:

FTIR (individual baseline correction, ZnSe):  $\nu$  [cm<sup>-1</sup>] = 3860 (vw), 3845 (vw), 3779 (vw), 3714 (vw), 3685 (vw), 3015 (vw), 2996 (vw), 2983 (vw), 2954 (vw), 2254 (vw), 2024 (vw), 2017 (vw), 1801 (vs), 1643 (m), 1481 (w), 1469 (w), 1450 (w), 1430 (w), 1386 (w), 1374 (vw), 1363 (w), 1330 (vw), 1268 (vw), 1184 (vw), 1169 (w), 1112 (vw), 1092 (vw), 1066 (vw), 1050 (vw), 992 (m), 949 (vw), 912 (w), 888 (vw), 851 (w), 779 (m), 653 (vw), 639 (vw), 601 (vw), 593 (vw).

### Single Crystal X-ray Diffraction

Crystals were grown by layering 1,2,3,4-Tetrafluorobenzene solutions with pentane. The data for all compounds were collected from a shock-cooled single crystal at 100(2) K (compounds **1a**, **b**, **2b**, **3a**, **4a**, **b**) or 200(2) K (compound **2a**) on a Bruker D8 VENTURE dual wavelength Mo/Cu three-circle diffractometer with a microfocus sealed X-ray tube using mirror optics as monochromator and a Bruker PHOTON III detector. The diffractometer was equipped with an Oxford Cryostream 800 low temperature device and used MoK $\alpha$  radiation ( $\lambda = 0.71073$  Å). All crystals were selected under perfluoropolyalkylether oil (AB128330, ABCR GmbH & Co. KG) at about -30 °C in a cold nitrogen gas stream using a custom-built low temperature mounting device and mounted on 0.1, 0.2 or 0.3 mm micromounts (M1-L19-100/200/300). All data were integrated with SAINT and a multi-scan absorption correction using SADABS-2016/2<sup>[4]</sup> was applied. The structures were solved by direct methods using SHELXT 2018/2 (Sheldrick, 2018)<sup>[5,6]</sup>, and refined by full-matrix least-squares methods against  $F^2$  by SHELXL-2018/3 (Sheldrick, 2018).<sup>[6]</sup> All non-hydrogen atoms were refined with anisotropic displacement parameters. The hydrogen atoms were refined isotropically on calculated positions using a riding model with their  $U_{iso}$  values constrained

to 1.5 times the  $U_{\text{eq}}$  of their pivot atoms for terminal  $\text{sp}^3$  carbon atoms and 1.2 times for all other carbon atoms. Disordered fragments were modeled with the DSR-tool.<sup>[7]</sup> All graphics of crystal structures were plotted with OLEX2 (version 1.2.10).<sup>[8]</sup> Crystallographic data (including structure factors) for the structures reported in this paper have been deposited with the Cambridge Crystallographic Data Centre. (CCDC 1998854 (**1a**), CCDC 1998851 (**2a**), CCDC 1998852 (**2b**), CCDC 1998853 (**3a**), CCDC 1909279 (**4a**), CCDC 1998922 (**4b**) contain the supplementary crystallographic data for this paper. Copies of the data can be obtained free of charge from The Cambridge Crystallographic Data Centre via [www.ccdc.cam.ac.uk/structures](http://www.ccdc.cam.ac.uk/structures).

### Computational Details

Quantum chemical calculations were performed with the TURBOMOLE<sup>[9]</sup> (version 7.2) program package. The investigated molecular structures were optimized at the density functional theory (DFT) level and were run in redundant internal coordinates using the BP86<sup>[10]</sup> functional with the resolution-of-identity (RI) approximation<sup>[11]</sup> together with the basis set def2-TZVPP<sup>[12]</sup> and with dispersion correction (DFT-D3(BJ))<sup>[13]</sup>. A fine integration grid (m4) and the default SCF convergence criteria ( $10^{-6}$  a. u.) were used. All optimized structures were checked for minima and imaginary frequencies with the implemented module AOFORCE<sup>[14]</sup> and for proper spin occupancies using the implemented module EIGER. Entropic contributions to enthalpy and Gibbs free energy with inclusion of zero point energies (ZPE) were calculated at the BP86-D3(BJ)/def2-TZVPP level for standard conditions with the FREEH module. IR spectra were calculated at the BP86-D3(BJ)/def2-TZVPP level of theory and simulated with an FWHM of  $10\text{ cm}^{-1}$ . The AIM<sup>[15]</sup> analysis was done using the program Multiwfn 3.6<sup>[16]</sup>, based on a wfn file generated with TURBOMOLE.

## Detailed Synthesis of Compounds 1 – 4

The syntheses of compounds **1** to **4** only differ in stoichiometry. Thus, the procedure is exclusively described for **1** in detail. All used quantities for syntheses of compounds **1** to **4** are listed in Table S1.

*Synthesis of 1:*  $[\text{NEt}_4]^+[\text{Nb}(\text{CO})_6]^-$  (0.05 g, 0.128 mmol, 2 eq) and  $\text{Ag}[\text{Al}(\text{OR}^{\text{F}})_4]$  (0.07 g, 0.0649 mmol, 1 eq) were weighed in the glovebox each in one side of a small double-Schlenk flask and dissolved in 4FB (each ca. 1.5 ml). The solution of  $\text{Ag}[\text{Al}(\text{OR}^{\text{F}})_4]$  was transferred to the other side through the frit at  $-40\text{ }^\circ\text{C}$ . The dark red solution was stirred for 30 minutes at  $-40\text{ }^\circ\text{C}$  to  $-30\text{ }^\circ\text{C}$ , layered with cold pentane and crystallized at  $-30\text{ }^\circ\text{C}$ . After 3 days  $[\text{NEt}_4]^+[\text{Ag}\{\text{Nb}(\text{CO})_6\}_2]^-$  was obtained as red crystals and the co-product  $[\text{NEt}_4]^+[\text{Al}(\text{OR}^{\text{F}})_4]^-$  as colorless crystals. Due to the sensitivity of the material, no yield can be given.

**Table S1.** Used quantities of the reactions of **1** – **4**.

|           | $[\text{NEt}_4][\text{M}(\text{CO})_6]$ |       |    | $\text{Ag}[\text{Al}(\text{OR}^{\text{F}})_4]$ |        |    |
|-----------|-----------------------------------------|-------|----|------------------------------------------------|--------|----|
|           | g                                       | mmol  | eq | g                                              | mmol   | eq |
| <b>1a</b> | 0.05                                    | 0.128 | 2  | 0.07                                           | 0.0649 | 1  |
| <b>1b</b> | 0.06                                    | 0.125 | 2  | 0.07                                           | 0.0626 | 1  |
| <b>2a</b> | 0.05                                    | 0.128 | 3  | 0.09                                           | 0.0852 | 2  |
| <b>2b</b> | 0.06                                    | 0.125 | 3  | 0.09                                           | 0.0835 | 2  |
| <b>3a</b> | 0.05                                    | 0.128 | 5  | 0.165                                          | 0.153  | 6  |
| <b>4a</b> | 0.06                                    | 0.128 | 4  | 0.206                                          | 0.192  | 6  |
| <b>4b</b> | 0.05                                    | 0.125 | 4  | 0.168                                          | 0.157  | 6  |

FTIR (precipitated at 243 K, individual baseline correction, ZnSe):

**1a:**  $\nu$  [ $\text{cm}^{-1}$ ] = 3014 (vw), 2986 (vw), 2954 (vw), 2050 (vw), 2024 (m), 1943 (w), 1847 (vs), 1823 (vs), 1521 (vw), 1482 (w), 1452 (vw), 1438 (vw), 1417 (vw), 1392 (vw), 1363 (vw), 1353 (vw), 1297 (vw), 1272 (w), 1249 (w), 1240 (w), 1212 (w), 1170 (w), 1162 (w), 1093 (vw), 1067 (vw), 1051 (vw), 996 (vw), 970 (m), 889 (vw), 889 (vw), 831 (vw), 805 (vw), 781 (w), 756 (vw), 727 (w).

**1b:**  $\nu$  [ $\text{cm}^{-1}$ ] = 3014 (vw), 2982 (vw), 2964 (vw), 2953 (vw), 2939 (vw), 2912 (vw), 2890 (vw), 2067 (vw), 2051 (vw), 2024 (s), 1980 (vw), 1954 (w), 1936 (w), 1855 (vs), 1822 (vs), 1520 (vw), 1513 (vw), 1482 (vw), 1452 (vw), 1438 (vw), 1416 (vw), 1398 (vw), 1391 (vw), 1352 (vw), 1297 (vw), 1272 (w), 1250 (w), 1240 (w), 1213 (m), 1161 (w), 1092 (vw), 1067 (vw), 1051 (vw), 996 (vw), 971 (s), 910 (vw), 899 (vw), 851 (vw), 831 (vw), 802 (vw), 781 (w), 756 (vw), 727 (m), 682 (vw).

**2a:**  $\nu$  [ $\text{cm}^{-1}$ ] = 3018 (vw), 2992 (vw), 2955 (vw), 2067 (vw), 2049 (vw), 2025 (s), 1947 (w), 1858 (vs), 1520 (vw), 1512 (vw), 1483 (vw), 1457 (vw), 1439 (vw), 1418 (vw), 1398 (vw), 1392 (vw), 1352 (vw), 1297 (w), 1272 (m), 1251 (w), 1239 (m), 1212 (vs), 1161 (m), 1067 (vw), 1046 (vw), 997 (vw), 970 (vs), 888 (vw), 831 (vw), 804 (vw), 781 (vw), 756 (vw), 745 (vw), 727 (s), 682 (vw).

**2b:**  $\nu$  [ $\text{cm}^{-1}$ ] = 2983 (vw), 2965 (vw), 2920 (vw), 2851 (vw), 2066 (w), 2032 (s), 1947 (w), 1873 (vs), 1842 (vs), 1520 (vw), 1511 (vw), 1483 (w), 1455 (vw), 1441 (vw), 1417 (vw), 1392 (vw), 1352 (vw), 1298 (w), 1272 (m), 1255 (m), 1240 (m), 1214 (vs), 1171 (w), 1162 (m), 1067 (vw), 1046 (vw), 998 (vw), 971 (vs), 904 (vw), 892 (vw), 831 (vw), 802 (vw), 781 (vw), 756 (vw), 745 (vw), 727 (vs), 682 (vw), 636 (vw), 571 (vw), 561 (vw).

**3a:**  $\nu$  [ $\text{cm}^{-1}$ ] = 3097 (vw), 3017 (vw), 2168 (vw), 2090 (vw), 2064 (vw), 2046 (vw), 2003 (vw), 1945 (vw), 1633 (vw), 1486 (vw), 1458 (vw), 1444 (vw), 1398 (vw), 1352 (vw), 1327 (vw), 1297 (w), 1271 (m), 1265 (m), 1238 (m), 1206 (vs), 1172 (m), 1159 (m), 1068 (vw), 1046 (vw), 998 (vw), 967 (vs), 864 (vw), 831 (vw), 803 (vw), 781 (vw), 756 (vw), 745 (vw), 725 (vs), 682 (vw), 645 (vw), 603 (vw), 593 (vw), 571 (vw), 560 (vw).

**4a:**  $\nu$  [ $\text{cm}^{-1}$ ] = 2965 (vw), 2946 (vw), 2110 (w), 2091 (w), 2077 (w), 1962 (vw), 1931 (w), 1886 (vw), 1745 (vw), 1635 (vw), 1523 (vw), 1507 (vw), 1486 (vw), 1458 (vw), 1444 (vw), 1398 (vw), 1352 (vw), 1326 (vw), 1297 (w), 1273 (m), 1240 (s), 1212 (vs), 1161 (m), 1068 (vw), 1044 (vw), 998 (vw), 970 (vs), 831 (vw), 805 (vw), 782 (vw), 756 (vw), 743 (vw), 727 (vs), 682 (vw), 602 (vw), 592 (vw), 571 (vw), 560 (vw).

**4b:**  $\nu$  [ $\text{cm}^{-1}$ ] = 2972 (vw), 2965 (vw), 2880 (vw), 2106 (w), 2081 (w), 2081 (w), 2067 (w), 1928 (w), 1632 (vw), 1522 (vw), 1507 (vw), 1486 (vw), 1458 (vw), 1444 (vw), 1398 (vw), 1352 (vw), 1326 (vw), 1297 (w), 1273 (m), 1240 (s), 1213 (vs), 1161 (m), 1068 (vw), 1044 (vw), 998 (vw), 971 (vs), 831 (vw), 805 (vw), 781 (vw), 756 (vw), 743 (vw), 727 (vs), 682 (vw), 602 (vw), 591 (vw), 571 (vw), 560 (vw).

## Vibrational Analysis

Full IR spectra of **1**, **2**, **3**, **4**,  $[\text{NEt}_4][\text{Nb}(\text{CO})_6]$  and  $[\text{NEt}_4][\text{Al}(\text{OR}^{\text{F}})_4]$

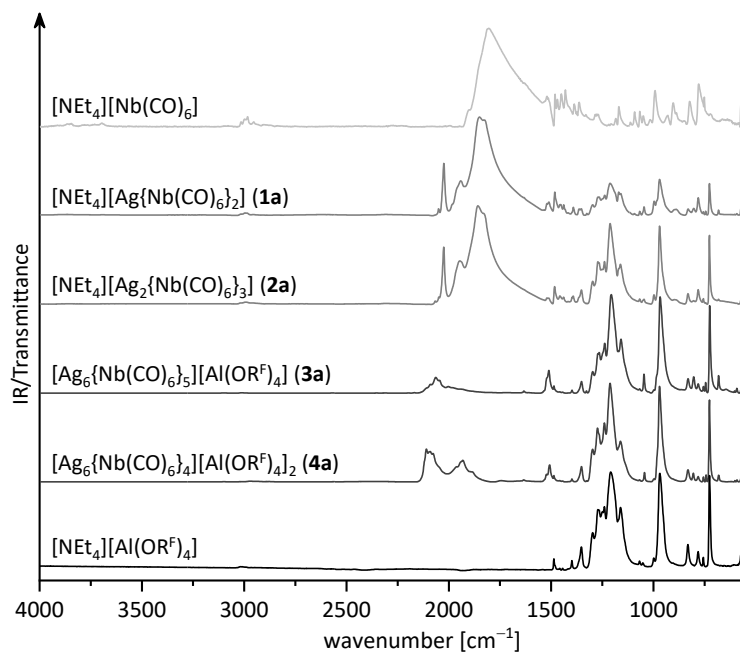

**Fig. S1.** Experimental IR spectra of the starting material  $[\text{NEt}_4][\text{Nb}(\text{CO})_6]$ , **1a**, **2a**, **4a** and the co product  $[\text{NEt}_4]^+[\text{Al}(\text{OR}^{\text{F}})_4]^-$ .

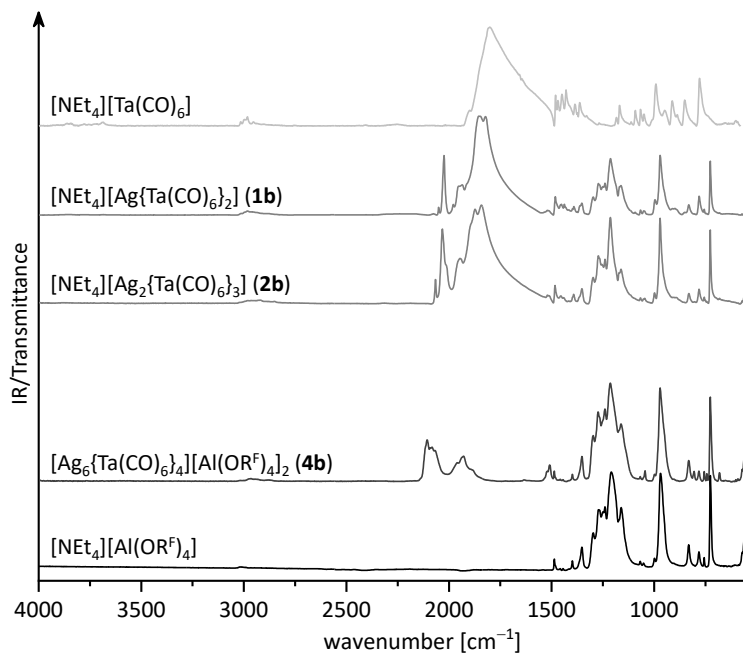

**Fig. S2.** Experimental IR spectra of the starting material  $[\text{NEt}_4][\text{Ta}(\text{CO})_6]$ , **1b**, **2b**, **4b** and the co product  $[\text{NEt}_4]^+[\text{Al}(\text{OR}^{\text{F}})_4]^-$ .



**Table S2.** Experimental IR data in the  $\nu(\text{CO})$  [ $\text{cm}^{-1}$ ] range of **1a**, **2ab**, **3a** and **4ab**. The relative intensities refer only to the CO vibration range. Thus, the most intensive CO band was set to 100%.

| <b>1a</b> | <b>1b</b> | <b>2a</b> | <b>2b</b> | <b>3a</b> | <b>4a</b> | <b>4b</b> |
|-----------|-----------|-----------|-----------|-----------|-----------|-----------|
|           |           |           |           | 2168 (vw) | 2110 (vs) |           |
|           |           |           |           |           |           | 2106 (vs) |
|           |           |           |           | 2090 (m)  | 2091 (vs) |           |
|           |           |           |           |           | 2077 (vs) | 2081 (vs) |
|           | 2067 (vw) | 2067 (vw) | 2066 (w)  | 2064 (vs) |           | 2067 (vs) |
| 2050 (vw) | 2051 (vw) | 2049 (vw) |           | 2046 (w)  |           |           |
| 2024 (m)  | 2024 (s)  | 2025 (s)  | 2032 (s)  |           |           |           |
|           |           |           |           | 2003 (w)  |           |           |
|           | 1980 (vw) |           |           |           |           |           |
|           | 1954 (w)  |           |           |           | 1962 (m)  |           |
| 1943 (w)  | 1936 (w)  | 1947 (w)  | 1947 (w)  | 1945 (vw) | 1931 (s)  | 1928 (s)  |
|           |           |           | 1873 (vs) | 1890 (vw) | 1886 (w)  |           |
| 1847 (vs) | 1855 (vs) | 1858 (vs) | 1842 (vs) |           |           |           |
| 1823 (vs) | 1822 (vs) |           |           |           |           |           |
|           |           |           |           |           | 1745 (vw) |           |
|           |           |           |           | 1633 (vw) | 1635 (vw) | 1632 (vw) |

**Table S3.** Experimental and calculated (\* BP86-D3(BJ)/def2-TZVPP) IR data in the  $\nu(\text{CO})$  [ $\text{cm}^{-1}$ ] range of **1a** and **b**. The relative intensities refer only to the CO vibration range. Thus, the most intensive CO band was set to 100%. <sup>a</sup> An imaginary frequency of  $-3.12 \text{ cm}^{-1}$  was obtained. <sup>b</sup> Imaginary frequencies of  $-15.07 \text{ cm}^{-1}$  were obtained.

| <b>1a</b> | <b>1a calc. (<math>C_2</math>)<sup>*a</sup></b> | <b>1b</b> | <b>1b calc. (<math>D_{3d}</math>)<sup>*b</sup></b> |
|-----------|-------------------------------------------------|-----------|----------------------------------------------------|
|           | 2032 (a, 0%)                                    |           |                                                    |
|           | 2008 (b, 58%)                                   |           | 2007 ( $a_{2u}$ , 62 %)                            |
|           | 1943 (b, 31%)                                   | 2067 (vw) | 1935 ( $e_u$ , 44 %)                               |
| 2050 (vw) | 1943 (a, 10%)                                   | 2051 (vw) |                                                    |
| 2024 (m)  | 1939 (a, 1%)                                    | 2024 (s)  |                                                    |
|           | 1938 (b, 38%)                                   | 1980 (vw) |                                                    |
|           | 1928 (a, 100%)                                  |           |                                                    |
|           | 1924 (b, 62%)                                   | 1954 (w)  | 1915 ( $e_u$ , 83 %)                               |
| 1943 (w)  | 1901 (b, 35%)                                   | 1936 (w)  | 1901 ( $a_{2u}$ , 100 %)                           |
| 1847 (vs) | 1895 (a, 1%)                                    | 1855 (vs) |                                                    |
| 1823 (vs) | 1889 (b, 47%)                                   | 1822 (vs) |                                                    |
|           | 1880 (a, 8%)                                    |           |                                                    |

**Table S4.** Experimental and calculated (\* BP86-D3(BJ)/def2-TZVPP) IR data in the  $\nu(\text{CO})$  [ $\text{cm}^{-1}$ ] range of **2a** and **b**. The relative intensities refer only to the CO vibration range. Thus, the most intensive CO band was set to 100%.

| <b>2a</b> | <b>2a calc. (<math>C_2</math>)*</b> | <b>2b</b> | <b>2b calc. (<math>C_2</math>)*</b> |
|-----------|-------------------------------------|-----------|-------------------------------------|
| 2067 (vw) | 2044 (a, 0%)                        | 2066 (w)  | 2043 (a, 0%)                        |
| 2049 (vw) | 2023 (b, 40%)                       |           | 2021 (b, 40%)                       |
| 2025 (s)  | 2015 (a, 100%)                      | 2032 (s)  | 2014 (a, 100%)                      |
|           | 1959 (b, 61%)                       |           | 1955 (b, 62%)                       |
|           | 1958 (a, 4%)                        |           | 1955 (a, 4%)                        |
|           | 1957 (b, 1%)                        |           | 1954 (b, 0%)                        |
|           | 1957 (a, 25%)                       |           | 1953 (a, 24%)                       |
|           | 1950 (b, 95%)                       |           | 1947 (b, 80%)                       |
| 1947 (w)  | 1949 (a, 2%)                        | 1947 (w)  | 1946 (a, 3%)                        |
|           | 1948 (b, 17%)                       |           | 1944 (b, 30%)                       |
|           | 1932 (b, 73%)                       |           | 1928 (b, 71%)                       |
|           | 1927 (a, 12%)                       |           | 1924 (a, 10%)                       |
|           | 1915 (b, 79%)                       |           | 1911 (b, 81%)                       |
|           | 1912 (a, 46%)                       |           | 1908 (a, 40%)                       |
|           | 1905 (a, 19%)                       |           | 1902 (a, 29%)                       |
|           | 1902 (a, 7%)                        |           | 1899 (a, 2%)                        |
|           | 1900 (b, 21%)                       | 1873 (vs) | 1897 (b, 17%)                       |
| 1858 (vs) | 1891 (b, 5%)                        | 1842 (vs) | 1887 (b, 6%)                        |

**Table S5.** Experimental and calculated (\* BP86-D3(BJ)/def2-TZVPP) IR data in the  $\nu(\text{CO})$  [ $\text{cm}^{-1}$ ] range of **3a**. The relative intensities refer only to the CO vibration range. Thus, the most intensive CO band was set to 100%.

| <b>3a</b> | <b>3a calc. (<math>C_{3h}</math>)*</b> |
|-----------|----------------------------------------|
| 2168 (vw) | 2075 (a", 100%)                        |
| 2090 (m)  | 2068 (e', 75%)                         |
|           | 2041 (e', 18%)                         |
| 2064 (vs) | 2033 (e', 5%)                          |
| 2046 (s)  | 2010 (a", 28%)                         |
| 2003 (w)  | 1965 (e', 27%)                         |
| 1945 (vw) | 1951 (a", 1%)                          |
|           | 1936 (a", 26)                          |
|           | 1929 (e', 9%)                          |
|           | 1902 (e', 8%)                          |
| 1890 (vw) |                                        |
| 1633 (vw) |                                        |

**Table S6.** Experimental and calculated (\* BP86-D3(BJ)/def2-TZVPP) IR data in the  $\nu(\text{CO})$  [ $\text{cm}^{-1}$ ] range of **4a** and **b**. The relative intensities refer only to the CO vibration range. Thus, the most intensive CO band was set to 100%.

| <b>4a</b> | <b>4a calc. (T)*</b> | <b>4b</b> | <b>4b calc. (T)*</b> |
|-----------|----------------------|-----------|----------------------|
| 2110 (vs) |                      |           |                      |
| 2091 (vs) | 2096 (t, 100 %)      | 2106 (vs) | 2093 (t, 100%)       |
| 2077 (vs) | 2073 (t, 33 %)       | 2081 (vs) | 2068 (t, 33%)        |
| 1962 (m)  | 2070 (t, 0 %)        | 2067 (vs) | 2064 (t, 0%)         |
| 1931 (s)  | 1953 (t, 23 %)       | 1928 (s)  | 1949 (t, 21%)        |
| 1886 (w)  | 1935 (t, 13 %)       |           | 1931 (t, 13%)        |
| 1745 (vw) | 1914 (t, 1 %)        |           | 1911 (t, 1%)         |
| 1635 (vw) |                      | 1632 (vw) |                      |

## Details of the AIM Analysis

**Table S7.** Calculated charges located at the niobium/tantalum atoms of complexes **1**, **2**, **3** and **4**.

|                                                   | <b>M:Ag</b> | <b>hapticity</b> | <b>Nb</b> | <b>Ta</b> |
|---------------------------------------------------|-------------|------------------|-----------|-----------|
| <b>M(CO)<sub>6</sub><sup>-</sup>O<sub>h</sub></b> |             |                  | 1.53      | 1.69      |
| <b>AgM2_C<sub>2</sub>/D<sub>3d</sub></b>          | 2           | μ <sub>1</sub>   | 1.57      | 1.71      |
| <b>Ag2M3_C<sub>2</sub></b>                        | 1.5         | μ <sub>1</sub>   | 1.58      | 1.72      |
|                                                   |             | μ <sub>2</sub>   | 1.58      | 1.71      |
| <b>Ag6M5_C<sub>3h</sub></b>                       | 0.8         | μ <sub>2</sub>   | 1.59      | -         |
|                                                   |             | μ <sub>3</sub>   | 1.59      | -         |
| <b>Ag6M4_T</b>                                    | 0.7         | μ <sub>3</sub>   | 1.58      | 1.72      |

**Table S8.** Calculated charges located at the silver atoms of complexes **1**, **2**, **3** and **4**.

|                                          | <b>M:Ag</b> | <b>Nb</b> | <b>Ta</b> |
|------------------------------------------|-------------|-----------|-----------|
| <b>AgM2_C<sub>2</sub>/D<sub>3d</sub></b> | 2           | 0.22      | 0.18      |
| <b>Ag2M3_C<sub>2</sub></b>               | 1.5         | 0.17      | 0.15      |
| <b>Ag6M5_C<sub>3h</sub></b>              | 0.8         | 0.11      | -         |
| <b>Ag6M4_T</b>                           | 0.7         | 0.14      | 0.13      |

**Table S9.** Calculated charges located at the [M(CO)<sub>6</sub>] fragments of complexes **1**, **2**, **3** and **4**.

|                                          | <b>M:Ag</b> | <b>hapticity</b> | <b>Nb</b> | <b>Ta</b> |
|------------------------------------------|-------------|------------------|-----------|-----------|
| <b>AgM2_C<sub>2</sub>/D<sub>3d</sub></b> | 2           | μ <sub>1</sub>   | -0.61     | -0.59     |
| <b>Ag2M3_C<sub>2</sub></b>               | 1.5         | μ <sub>1</sub>   | -0.49     | -0.49     |
|                                          |             | μ <sub>2</sub>   | -0.34     | -0.33     |
| <b>Ag6M5_C<sub>3h</sub></b>              | 0.8         | μ <sub>2</sub>   | 0.03      | -         |
|                                          |             | μ <sub>3</sub>   | 0.14      | -         |
| <b>Ag6M4_T</b>                           | 0.7         | μ <sub>3</sub>   | 0.28      | 0.31      |

**Table S10.** Calculated averaged charges located at the CO ligands of complexes **1**, **2**, **3** and **4**.

|                                                   |         | <b>hapticity</b>       | <b>Nb</b> | <b>Ta</b> |
|---------------------------------------------------|---------|------------------------|-----------|-----------|
| <b>M(CO)<sub>6</sub><sup>-</sup>O<sub>h</sub></b> |         |                        | -2.53     | -2.69     |
| <b>AgM2_C<sub>2</sub>/D<sub>3d</sub></b>          | $\mu_1$ | CO <sub>Ag</sub>       | -0.39     | -0.20     |
|                                                   |         | CO <sub>terminal</sub> | -0.35     | -0.18     |
| <b>Ag2M3_C<sub>2</sub></b>                        | $\mu_1$ | CO <sub>Ag</sub>       | -0.38     | -0.40     |
|                                                   |         | CO <sub>terminal</sub> | -0.31     | -0.33     |
|                                                   | $\mu_2$ | CO <sub>Ag</sub>       | -0.33     | -0.35     |
|                                                   |         | CO <sub>terminal</sub> | -0.29     | -0.31     |
| <b>Ag6M5_C<sub>3h</sub></b>                       | $\mu_2$ | CO <sub>Ag</sub>       | -0.33     | -         |
|                                                   |         | CO <sub>terminal</sub> | -0.20     | -         |
|                                                   | $\mu_3$ | CO <sub>Ag</sub>       | -0.33     | -         |
|                                                   |         | CO <sub>terminal</sub> | -0.16     | -         |
| <b>Ag6M4_T</b>                                    | $\mu_3$ | CO <sub>Ag</sub>       | -0.33     | -0.35     |
|                                                   |         | CO <sub>terminal</sub> | -0.11     | -0.12     |

**Table S11.** Overview of calculated averaged charges of the complexes **1** – **4**.

|             |                  | $\delta_M$ |           | $\delta_{Ag}$ |           | $\delta_{M(CO)_6}$ |           | $\delta_{COAg}$ | $\delta_{COterm}$ | $\delta_{COAg}$ | $\delta_{COterm}$ |       |
|-------------|------------------|------------|-----------|---------------|-----------|--------------------|-----------|-----------------|-------------------|-----------------|-------------------|-------|
| <b>M:Ag</b> | <b>hapticity</b> | <b>Nb</b>  | <b>Ta</b> | <b>Nb</b>     | <b>Ta</b> | <b>Nb</b>          | <b>Ta</b> | <b>Nb</b>       |                   | <b>Ta</b>       |                   |       |
| *           |                  | 1.53       | 1.69      |               |           |                    |           | -2.53           |                   | -2.69           |                   |       |
| <b>1</b>    | 2                | $\mu_1$    | 1.57      | 1.71          | 0.22      | 0.18               | -0.61     | -0.59           | -0.39             | -0.35           | -0.20             | -0.18 |
| <b>2</b>    | 1.5              | $\mu_1$    | 1.58      | 1.72          | 0.17      | 0.15               | -0.49     | -0.49           | -0.38             | -0.31           | -0.40             | -0.33 |
|             |                  | $\mu_2$    | 1.58      | 1.71          |           |                    | -0.34     | -0.33           | -0.33             | -0.29           | -0.35             | -0.31 |
| <b>3</b>    | 0.8              | $\mu_2$    | 1.59      | -             | 0.11      | -                  | 0.03      | -               | -0.33             | -0.20           | -                 | -     |
|             |                  | $\mu_3$    | 1.59      | -             |           |                    | 0.14      | -               | -0.33             | -0.16           | -                 | -     |
| <b>4</b>    | 0.7              | $\mu_3$    | 1.58      | 1.72          | 0.14      | 0.13               | 0.28      | 0.31            | -0.33             | -0.11           | -0.35             | -0.12 |

\* [M(CO)<sub>6</sub>]<sup>-</sup>.

Examples for the calculation of the electron transfer from [Nb(CO)<sub>6</sub>] to Ag<sub>6</sub>:

Calculation for 3<sup>+</sup>:

$$\delta_{\text{CO}}(\mathbf{3}^+) = \delta_{\text{CO}}(\mu_3) * 2 + \delta_{\text{CO}}(\mu_2) * 3 = -1.47 * 2 + (-1.59 * 3) = -7.71$$

$$\delta_{\text{CO}}([\text{Nb}(\text{CO})_6]) = -2.53 * 5 = -12.65$$

$$\text{Transferred electrons: } \delta_{\text{CO}}(\mathbf{3}^+) - \delta_{\text{CO}}([\text{Nb}(\text{CO})_6]) = -7.71 - (-12.65) = \mathbf{4.94}$$

Calculation for 4a<sup>2+</sup>:

$$\delta_{\text{CO}}(\mathbf{4a}^{2+}) = \delta_{\text{CO}}(\mu_3) * 4 = -1.32 * 4 = -5.28$$

$$\delta_{\text{CO}}([\text{Nb}(\text{CO})_6]) = -2.53 * 4 = -10.12$$

$$\text{Transferred electrons: } \delta_{\text{CO}}(\mathbf{4a}^{2+}) - \delta_{\text{CO}}([\text{Nb}(\text{CO})_6]) = -5.28 - (-10.12) = \mathbf{4.84}$$

**Table S12.** Average values of the electron density [ $\text{e}\text{\AA}^{-3}$ ] at bond critical points of the complexes **1** – **4**.

|                                                   | bcp            |      | Ag-Ag |      | Ag-M |      | Ag-C |      | M-C  |      | C-O <sub>Ag</sub> |      | C-O <sub>terminal</sub> |  |
|---------------------------------------------------|----------------|------|-------|------|------|------|------|------|------|------|-------------------|------|-------------------------|--|
|                                                   | M =            | Nb   | Ta    | Nb   | Ta   | Nb   | Ta   | Nb   | Ta   | Nb   | Ta                | Nb   | Ta                      |  |
| <b>M(CO)<sub>6</sub><sup>-</sup>O<sub>h</sub></b> |                | -    | -     | -    | -    | -    | -    | 0.62 | 0.65 | -    | -                 | 3.09 | 3.08                    |  |
| <b>AgM2_C2/D<sub>3d</sub></b>                     | μ <sub>1</sub> | -    | -     | 0.26 | 0.28 | 0.34 | 0.26 | 0.63 | 0.64 | 3.11 | 3.11              | 3.15 | 3.16                    |  |
| <b>Ag2M3_C2</b>                                   | μ <sub>1</sub> | 0.25 | 0.26  | 0.29 | 0.30 | 0.26 | 0.26 | 0.62 | 0.65 | 3.12 | 3.11              | 3.16 | 3.16                    |  |
|                                                   | μ <sub>2</sub> |      |       | *    | *    | 0.42 | 0.41 | 0.63 | 0.65 | 3.12 | 3.11              | 3.16 | 3.16                    |  |
| <b>Ag6M5_C<sub>3h</sub></b>                       | μ <sub>2</sub> | 0.24 | -     | 0.25 | -    | 0.31 | -    | 0.61 | -    | 3.17 | -                 | 3.26 | -                       |  |
|                                                   | μ <sub>3</sub> |      | -     | 0.22 | -    | 0.26 | -    | 0.63 | -    | 3.16 | -                 | 3.27 | -                       |  |
| <b>Ag6M4_T</b>                                    | μ <sub>3</sub> | 0.21 | 0.21  | *    | *    | 0.35 | 0.34 | 0.60 | 0.64 | 3.16 | 3.15              | 3.31 | 3.30                    |  |

\* No bond critical point was found on this interaction line.

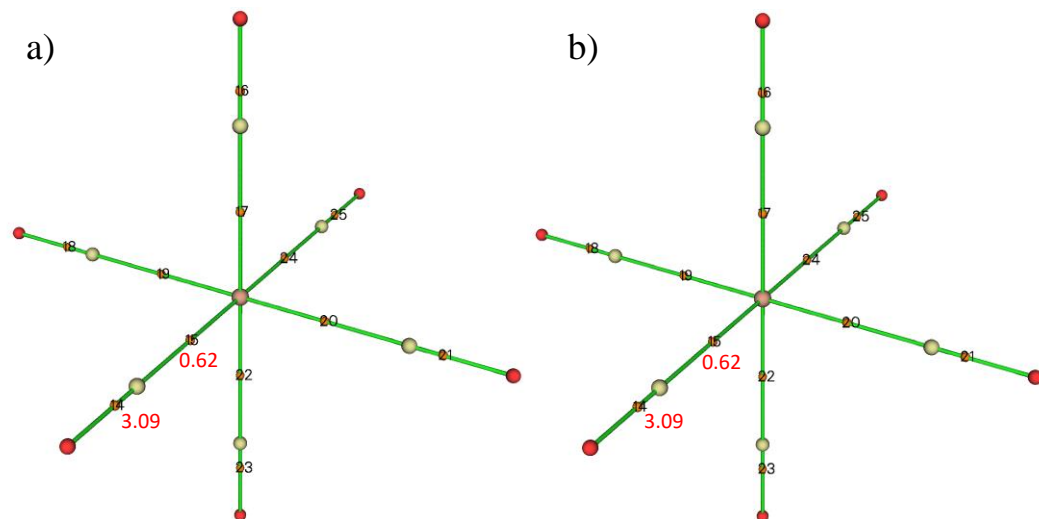

**Fig. S3.** Electron density [ $e\text{\AA}^{-3}$ ] at bond critical points of the starting materials  $[M(CO)_6]^-$  ( $M = Nb$  (a),  $Ta$  (b)).

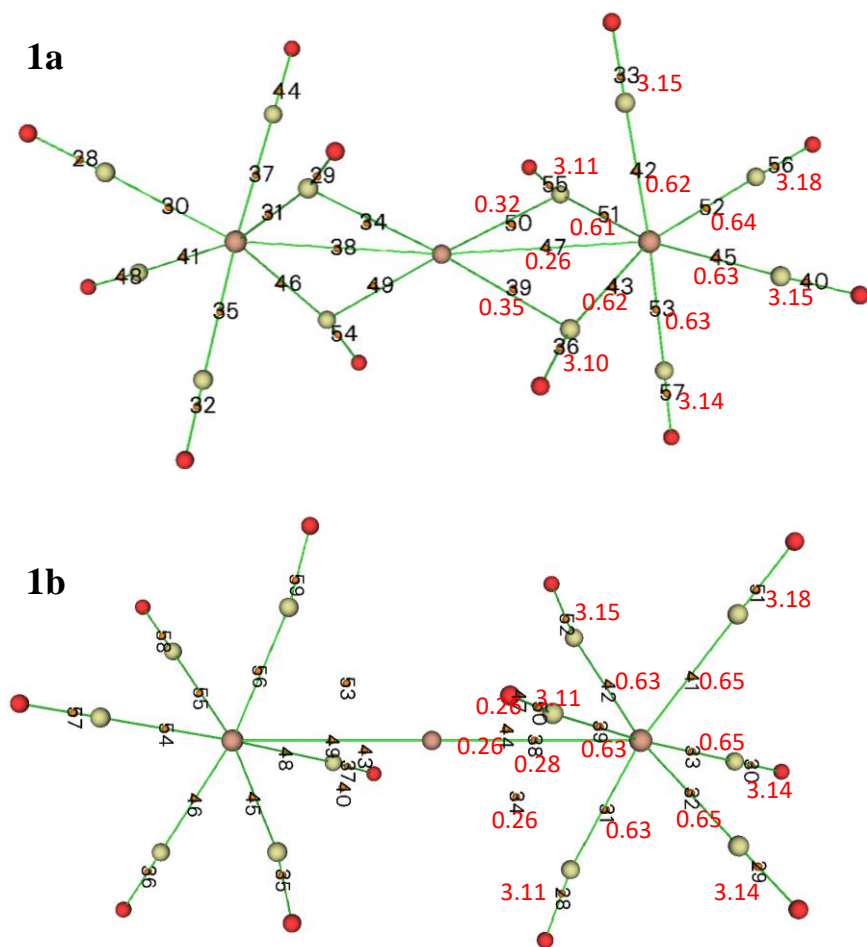

**Fig. S4.** Electron density [ $\text{e}\text{\AA}^{-3}$ ] at bond critical points of **1a** and **b**.

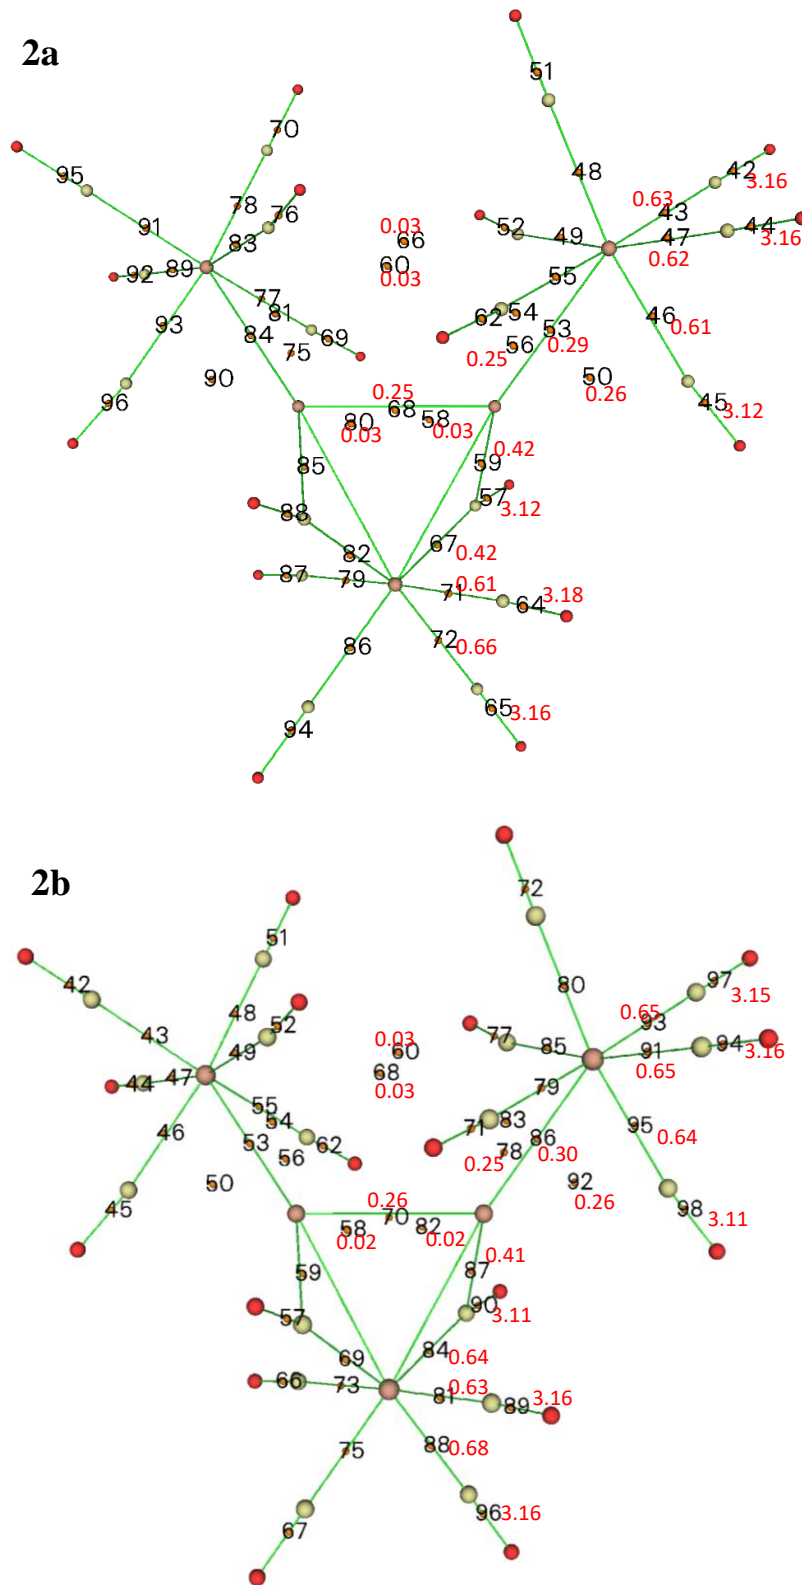

**Fig. S5.** Electron density [ $\text{e}\text{\AA}^{-3}$ ] at bond critical points of **2a** and **b**.



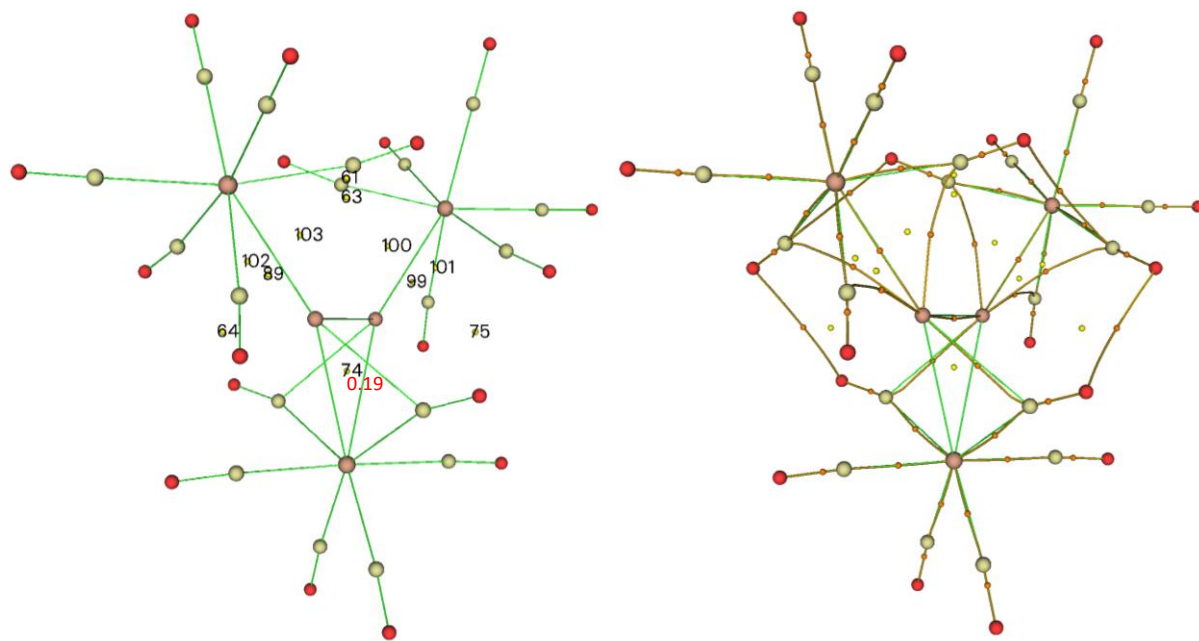

**Fig. S6.** Electron density [ $e\text{Å}^{-3}$ ] at ring critical point and connecting path of bond critical points of **2a**.

**4a**

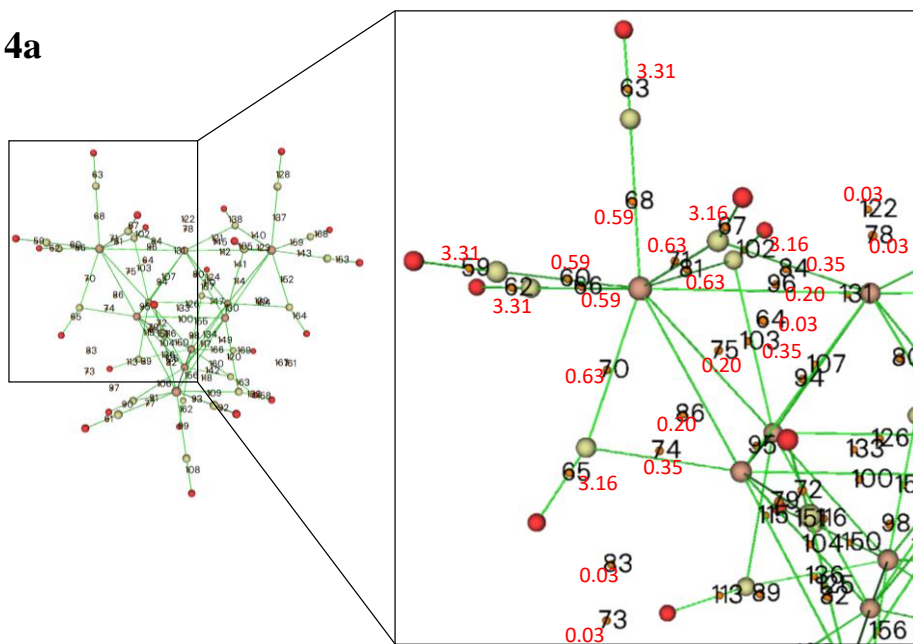

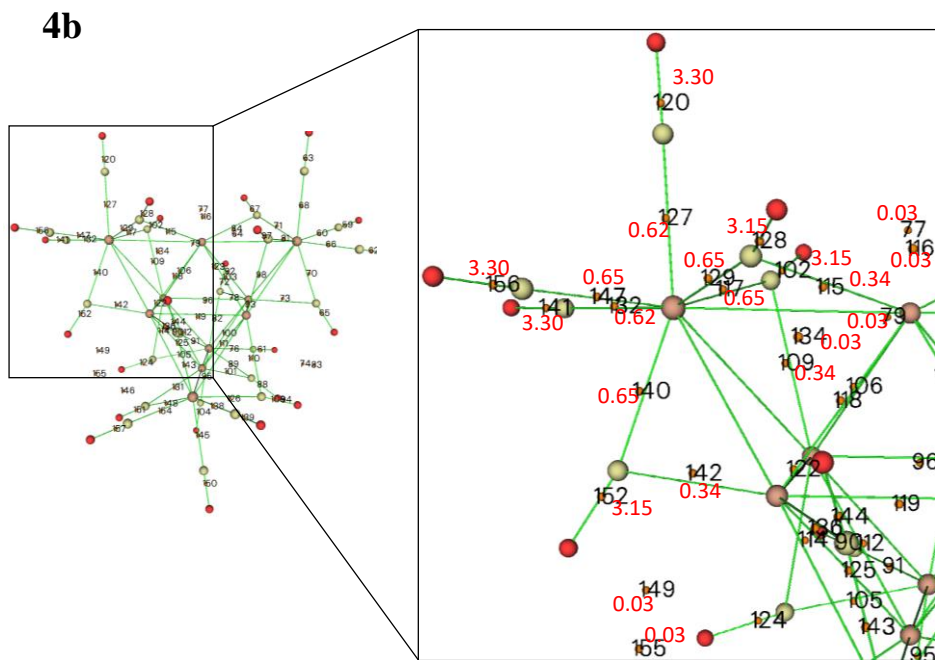

**Fig. S7.** Electron density [ $e\text{\AA}^{-3}$ ] at bond critical points of **4a** and **b**.

## Computational Details to the Structure Determination

All structures were optimized at the (RI-)BP86-D3BJ/def-TZVPP level of theory.

### Calculated Structure of Nb(CO)<sub>6</sub> (O<sub>h</sub>)

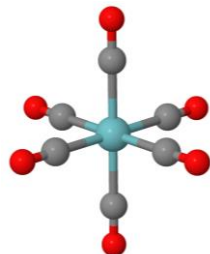

Symmetry: oh  
Method: (RI-)b-p/def2-TZVPP

|    |          |          |          |
|----|----------|----------|----------|
| Nb | 0.00000  | 0.00000  | 0.00000  |
| C  | -2.12125 | -0.00000 | 0.00000  |
| C  | 2.12125  | 0.00000  | -0.00000 |
| C  | -0.00000 | -0.00000 | -2.12125 |
| C  | 0.00000  | -2.12125 | 0.00000  |
| C  | 0.00000  | 0.00000  | 2.12125  |
| C  | -0.00000 | 2.12125  | 0.00000  |
| O  | -0.00000 | 0.00000  | 3.28863  |
| O  | -0.00000 | 3.28863  | 0.00000  |
| O  | 3.28863  | 0.00000  | -0.00000 |
| O  | 0.00000  | -0.00000 | -3.28863 |
| O  | 0.00000  | -3.28863 | 0.00000  |
| O  | -3.28863 | -0.00000 | 0.00000  |

SCF energy GEOOPT = -737.6545788163 H  
ZPE = 118.5 kJ/mol  
FREEH energy = 158.85 kJ/mol  
FREEH entropy = 0.52945 kJ/mol

| Svibrational spectrum |      |                                      |                        | selection rules |       |
|-----------------------|------|--------------------------------------|------------------------|-----------------|-------|
| #                     | mode | wave number<br>cm <sup>**</sup> (-1) | IR intensity<br>km/mol | IR              | RAMAN |
| 1                     |      | -0.00                                | 0.00000                | -               | -     |
| 2                     |      | -0.00                                | 0.00000                | -               | -     |
| 3                     |      | -0.00                                | 0.00000                | -               | -     |
| 4                     |      | 0.00                                 | 0.00000                | -               | -     |
| 5                     |      | 0.00                                 | 0.00000                | -               | -     |
| 6                     |      | 0.00                                 | 0.00000                | -               | -     |
| 7                     | t2u  | 36.72                                | 0.00000                | NO              | NO    |
| 8                     | t2u  | 36.72                                | 0.00000                | NO              | NO    |
| 9                     | t2u  | 36.72                                | 0.00000                | NO              | NO    |
| 10                    | t1u  | 59.30                                | 0.58573                | YES             | NO    |
| 11                    | t1u  | 59.30                                | 0.58573                | YES             | NO    |
| 12                    | t1u  | 59.30                                | 0.58573                | YES             | NO    |
| 13                    | t2g  | 64.87                                | 0.00000                | NO              | YES   |
| 14                    | t2g  | 64.87                                | 0.00000                | NO              | YES   |
| 15                    | t2g  | 64.87                                | 0.00000                | NO              | YES   |
| 16                    | t1g  | 333.41                               | 0.00000                | NO              | NO    |
| 17                    | t1g  | 333.41                               | 0.00000                | NO              | NO    |
| 18                    | t1g  | 333.41                               | 0.00000                | NO              | NO    |
| 19                    | eg   | 382.52                               | 0.00000                | NO              | YES   |
| 20                    | eg   | 382.52                               | 0.00000                | NO              | YES   |
| 21                    | a1g  | 391.16                               | 0.00000                | NO              | YES   |
| 22                    | t1u  | 392.76                               | 17.87460               | YES             | NO    |
| 23                    | t1u  | 392.76                               | 17.87460               | YES             | NO    |
| 24                    | t1u  | 392.76                               | 17.87460               | YES             | NO    |
| 25                    | t2g  | 445.96                               | 0.00000                | NO              | YES   |
| 26                    | t2g  | 445.96                               | 0.00000                | NO              | YES   |
| 27                    | t2g  | 445.96                               | 0.00000                | NO              | YES   |
| 28                    | t2u  | 493.84                               | 0.00000                | NO              | NO    |
| 29                    | t2u  | 493.84                               | 0.00000                | NO              | NO    |
| 30                    | t2u  | 493.84                               | 0.00000                | NO              | NO    |
| 31                    | t1u  | 579.03                               | 63.86825               | YES             | NO    |
| 32                    | t1u  | 579.03                               | 63.86825               | YES             | NO    |
| 33                    | t1u  | 579.03                               | 63.86825               | YES             | NO    |
| 34                    | t1u  | 1881.16                              | 2516.98749             | YES             | NO    |
| 35                    | t1u  | 1881.16                              | 2516.98749             | YES             | NO    |
| 36                    | t1u  | 1881.16                              | 2516.98749             | YES             | NO    |
| 37                    | eg   | 1897.73                              | 0.00000                | NO              | YES   |
| 38                    | eg   | 1897.73                              | 0.00000                | NO              | YES   |
| 39                    | a1g  | 2007.05                              | 0.00000                | NO              | YES   |

### Calculated Structure of Ta(CO)<sub>6</sub> (O<sub>h</sub>)

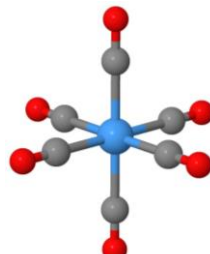

Symmetry: oh  
Method: (RI-)b-p/def2-TZVPP

|    |          |          |          |
|----|----------|----------|----------|
| Ta | 0.00000  | 0.00000  | -0.00000 |
| C  | -2.12436 | -0.00000 | -0.00000 |
| C  | 2.12436  | 0.00000  | 0.00000  |
| C  | -0.00000 | -0.00000 | -2.12436 |
| C  | 0.00000  | -2.12436 | -0.00000 |
| C  | 0.00000  | 0.00000  | 2.12436  |
| C  | -0.00000 | 2.12436  | 0.00000  |
| O  | -0.00000 | 0.00000  | 3.29283  |
| O  | -0.00000 | 3.29283  | -0.00000 |
| O  | 3.29283  | 0.00000  | 0.00000  |
| O  | 0.00000  | -0.00000 | -3.29283 |
| O  | 0.00000  | -3.29283 | 0.00000  |
| O  | -3.29283 | -0.00000 | -0.00000 |

SCF energy GEOOPT = -737.7018863041 H  
ZPE = 118.1 kJ/mol  
FREEH energy = 158.48 kJ/mol  
FREEH entropy = 0.53370 kJ/mol

| Svibrational spectrum |      |                                      |                        | selection rules |       |
|-----------------------|------|--------------------------------------|------------------------|-----------------|-------|
| #                     | mode | wave number<br>cm <sup>**</sup> (-1) | IR intensity<br>km/mol | IR              | RAMAN |
| 1                     |      | -0.00                                | 0.00000                | -               | -     |
| 2                     |      | -0.00                                | 0.00000                | -               | -     |
| 3                     |      | -0.00                                | 0.00000                | -               | -     |
| 4                     |      | -0.00                                | 0.00000                | -               | -     |
| 5                     |      | -0.00                                | 0.00000                | -               | -     |
| 6                     |      | 0.00                                 | 0.00000                | -               | -     |
| 7                     | t2u  | 36.38                                | 0.00000                | NO              | NO    |
| 8                     | t2u  | 36.38                                | 0.00000                | NO              | NO    |
| 9                     | t2u  | 36.38                                | 0.00000                | NO              | NO    |
| 10                    | t1u  | 57.46                                | 0.95349                | YES             | NO    |
| 11                    | t1u  | 57.46                                | 0.95349                | YES             | NO    |
| 12                    | t1u  | 57.46                                | 0.95349                | YES             | NO    |
| 13                    | t2g  | 66.94                                | 0.00000                | NO              | YES   |
| 14                    | t2g  | 66.94                                | 0.00000                | NO              | YES   |
| 15                    | t2g  | 66.94                                | 0.00000                | NO              | YES   |
| 16                    | t1g  | 343.57                               | 0.00000                | NO              | NO    |
| 17                    | t1g  | 343.57                               | 0.00000                | NO              | NO    |
| 18                    | t1g  | 343.57                               | 0.00000                | NO              | NO    |
| 19                    | t1u  | 378.08                               | 17.19927               | YES             | NO    |
| 20                    | t1u  | 378.08                               | 17.19927               | YES             | NO    |
| 21                    | t1u  | 378.08                               | 17.19927               | YES             | NO    |
| 22                    | eg   | 394.74                               | 0.00000                | NO              | YES   |
| 23                    | eg   | 394.74                               | 0.00000                | NO              | YES   |
| 24                    | a1g  | 403.83                               | 0.00000                | NO              | YES   |
| 25                    | t2g  | 437.70                               | 0.00000                | NO              | YES   |
| 26                    | t2g  | 437.70                               | 0.00000                | NO              | YES   |
| 27                    | t2g  | 437.70                               | 0.00000                | NO              | YES   |
| 28                    | t2u  | 496.47                               | 0.00000                | NO              | NO    |
| 29                    | t2u  | 496.47                               | 0.00000                | NO              | NO    |
| 30                    | t2u  | 496.47                               | 0.00000                | NO              | NO    |
| 31                    | t1u  | 554.73                               | 40.72341               | YES             | NO    |
| 32                    | t1u  | 554.73                               | 40.72341               | YES             | NO    |
| 33                    | t1u  | 554.73                               | 40.72341               | YES             | NO    |
| 34                    | t1u  | 1879.19                              | 2523.16473             | YES             | NO    |
| 35                    | t1u  | 1879.19                              | 2523.16473             | YES             | NO    |
| 36                    | t1u  | 1879.19                              | 2523.16473             | YES             | NO    |
| 37                    | eg   | 1895.87                              | 0.00000                | NO              | YES   |
| 38                    | eg   | 1895.87                              | 0.00000                | NO              | YES   |
| 39                    | a1g  | 2006.60                              | 0.00000                | NO              | YES   |

### Calculated Structure of [Ag{Nb(CO)<sub>6</sub>}<sub>2</sub>]<sup>-</sup> (C<sub>2</sub>)

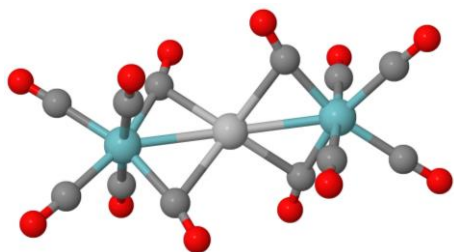

Symmetry: c2

Method: (RI-)b-p/def2-TZVPP

|    |          |          |          |
|----|----------|----------|----------|
| Ag | 0.00000  | -0.00000 | -0.16825 |
| O  | 0.84474  | 2.76511  | 1.11659  |
| C  | 1.41627  | 1.84392  | 0.68760  |
| Nb | 2.80218  | 0.36410  | 0.00318  |
| Nb | -2.80218 | -0.36410 | 0.00318  |
| O  | 5.00447  | 2.35592  | 1.40135  |
| C  | 4.20932  | 1.66504  | 0.91719  |
| O  | 5.54076  | -1.31517 | -0.66800 |
| C  | 4.56134  | -0.73649 | -0.44385 |
| C  | 2.93632  | 1.44577  | -1.81927 |
| O  | 3.00061  | 2.03588  | -2.81702 |
| C  | 1.89268  | -1.20937 | -1.12444 |
| O  | 1.62164  | -2.12380 | -1.79750 |
| O  | 2.43816  | -1.31429 | 2.80969  |
| C  | 2.56275  | -0.72387 | 1.81860  |
| O  | -1.62164 | 2.12380  | -1.79750 |
| C  | -1.89268 | 1.20937  | -1.12444 |
| O  | -2.43816 | 1.31429  | 2.80969  |
| C  | -2.56275 | 0.72387  | 1.81860  |
| C  | -4.56134 | 0.73649  | -0.44385 |
| O  | -5.54076 | 1.31517  | -0.66800 |
| C  | -4.20932 | -1.66504 | 0.91719  |
| O  | -5.00447 | -2.35592 | 1.40135  |
| C  | -2.93632 | -1.44577 | -1.81927 |
| O  | -3.00061 | -2.03588 | -2.81702 |
| C  | -1.41627 | -1.84392 | 0.68760  |
| O  | -0.84474 | -2.76511 | 1.11659  |

SCF energy GEOPT = -1622.440919816 H

ZPE = 241.8 kJ/mol

FREEH energy = 331.53 kJ/mol

FREEH entropy = 0.98944 kJ/mol

| Vibrational spectrum |          | wave number<br>cm <sup>-1</sup> (-1) | IR intensity<br>km/mol | selection rules |       |
|----------------------|----------|--------------------------------------|------------------------|-----------------|-------|
| # mode               | symmetry |                                      |                        | IR              | RAMAN |
| 1                    | a        | -3.12                                | 0.00000                | YES             | YES   |
| 2                    |          | -0.00                                | 0.00000                | -               | -     |
| 3                    |          | -0.00                                | 0.00000                | -               | -     |
| 4                    |          | 0.00                                 | 0.00000                | -               | -     |
| 5                    |          | 0.00                                 | 0.00000                | -               | -     |
| 6                    |          | 0.00                                 | 0.00000                | -               | -     |
| 7                    |          | 0.00                                 | 0.00000                | -               | -     |
| 8                    | b        | 9.44                                 | 0.00736                | YES             | YES   |
| 9                    | a        | 9.60                                 | 0.00021                | YES             | YES   |
| 10                   | b        | 17.50                                | 0.02759                | YES             | YES   |
| 11                   | a        | 20.65                                | 0.01415                | YES             | YES   |
| 12                   | b        | 22.85                                | 0.03641                | YES             | YES   |
| 13                   | a        | 28.49                                | 0.22164                | YES             | YES   |
| 14                   | a        | 35.55                                | 0.00472                | YES             | YES   |
| 15                   | b        | 39.02                                | 0.08162                | YES             | YES   |
| 16                   | a        | 50.50                                | 0.02987                | YES             | YES   |
| 17                   | b        | 54.12                                | 0.23035                | YES             | YES   |
| 18                   | a        | 60.82                                | 0.05690                | YES             | YES   |
| 19                   | a        | 61.16                                | 0.47398                | YES             | YES   |
| 20                   | b        | 61.95                                | 1.16599                | YES             | YES   |
| 21                   | a        | 64.92                                | 0.79411                | YES             | YES   |
| 22                   | b        | 64.94                                | 0.37208                | YES             | YES   |
| 23                   | b        | 66.79                                | 0.02486                | YES             | YES   |
| 24                   | a        | 67.29                                | 0.00174                | YES             | YES   |
| 25                   | b        | 68.93                                | 0.37696                | YES             | YES   |
| 26                   | a        | 71.13                                | 0.02341                | YES             | YES   |
| 27                   | b        | 72.02                                | 0.80901                | YES             | YES   |
| 28                   | a        | 93.12                                | 0.25800                | YES             | YES   |
| 29                   | a        | 97.95                                | 0.01945                | YES             | YES   |
| 30                   | b        | 106.41                               | 0.42804                | YES             | YES   |
| 31                   | b        | 115.86                               | 0.50598                | YES             | YES   |
| 32                   | a        | 122.55                               | 0.00157                | YES             | YES   |
| 33                   | b        | 167.57                               | 5.78259                | YES             | YES   |
| 34                   | a        | 332.28                               | 0.11050                | YES             | YES   |
| 35                   | b        | 334.07                               | 0.22343                | YES             | YES   |
| 36                   | a        | 336.09                               | 0.02317                | YES             | YES   |
| 37                   | b        | 336.27                               | 0.08779                | YES             | YES   |
| 38                   | a        | 337.16                               | 0.01037                | YES             | YES   |
| 39                   | b        | 337.18                               | 0.08623                | YES             | YES   |
| 40                   | a        | 353.97                               | 0.05354                | YES             | YES   |
| 41                   | b        | 356.20                               | 1.35673                | YES             | YES   |
| 42                   | a        | 372.92                               | 2.62179                | YES             | YES   |
| 43                   | b        | 372.95                               | 4.70693                | YES             | YES   |
| 44                   | b        | 381.53                               | 3.47949                | YES             | YES   |
| 45                   | a        | 381.60                               | 4.99167                | YES             | YES   |
| 46                   | b        | 386.40                               | 7.35871                | YES             | YES   |
| 47                   | a        | 386.62                               | 19.96736               | YES             | YES   |
| 48                   | b        | 398.09                               | 46.86708               | YES             | YES   |
| 49                   | a        | 399.62                               | 0.15308                | YES             | YES   |
| 50                   | a        | 407.40                               | 6.50188                | YES             | YES   |
| 51                   | b        | 408.44                               | 15.02753               | YES             | YES   |
| 52                   | b        | 443.59                               | 0.09197                | YES             | YES   |
| 53                   | a        | 443.66                               | 0.01912                | YES             | YES   |
| 54                   | a        | 444.69                               | 0.04585                | YES             | YES   |
| 55                   | b        | 444.91                               | 0.13343                | YES             | YES   |
| 56                   | b        | 457.09                               | 3.93669                | YES             | YES   |
| 57                   | a        | 459.69                               | 0.00631                | YES             | YES   |
| 58                   | b        | 460.42                               | 1.35243                | YES             | YES   |
| 59                   | a        | 463.81                               | 0.10683                | YES             | YES   |
| 60                   | b        | 478.98                               | 33.14539               | YES             | YES   |
| 61                   | a        | 479.80                               | 0.17870                | YES             | YES   |
| 62                   | a        | 484.99                               | 0.01909                | YES             | YES   |
| 63                   | b        | 485.31                               | 0.17724                | YES             | YES   |
| 64                   | b        | 557.55                               | 311.36664              | YES             | YES   |
| 65                   | a        | 563.22                               | 9.03205                | YES             | YES   |
| 66                   | a        | 563.61                               | 11.34863               | YES             | YES   |
| 67                   | b        | 564.50                               | 59.44273               | YES             | YES   |
| 68                   | b        | 565.48                               | 37.36421               | YES             | YES   |
| 69                   | a        | 566.44                               | 74.25832               | YES             | YES   |
| 70                   | a        | 1880.18                              | 256.20372              | YES             | YES   |
| 71                   | b        | 1888.85                              | 1504.07520             | YES             | YES   |
| 72                   | a        | 1894.72                              | 20.58223               | YES             | YES   |
| 73                   | b        | 1900.80                              | 1105.05238             | YES             | YES   |
| 74                   | b        | 1924.35                              | 1989.13412             | YES             | YES   |
| 75                   | a        | 1928.04                              | 3198.11844             | YES             | YES   |
| 76                   | b        | 1938.40                              | 1230.15007             | YES             | YES   |
| 77                   | a        | 1938.98                              | 18.15382               | YES             | YES   |
| 78                   | a        | 1943.26                              | 311.00963              | YES             | YES   |
| 79                   | b        | 1943.40                              | 1004.43986             | YES             | YES   |
| 80                   | b        | 2008.05                              | 1867.00542             | YES             | YES   |
| 81                   | a        | 2032.49                              | 6.18270                | YES             | YES   |

### Calculated Structure of [Ag{Ta(CO)<sub>6</sub>]<sub>2</sub>]<sup>-</sup> (D<sub>3d</sub>)

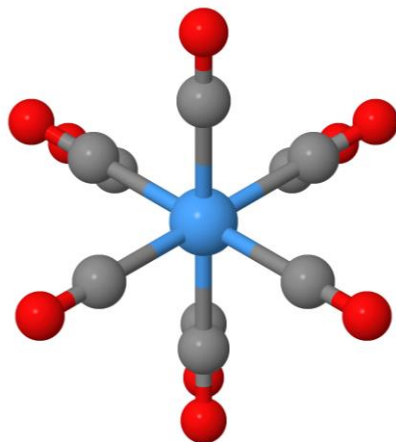

Symmetry: d3d  
Method: (RI-)b-p/def2-TZVPP

|    |          |          |          |
|----|----------|----------|----------|
| Ag | 0.00000  | 0.00000  | 0.00000  |
| O  | 2.59700  | 1.49938  | 1.44039  |
| C  | 1.64631  | 0.95050  | 1.83011  |
| Ta | -0.00000 | 0.00000  | 2.81777  |
| Ta | -0.00000 | -0.00000 | -2.81777 |
| O  | -0.00000 | 2.65083  | 4.76387  |
| C  | 0.00000  | 1.71810  | 4.07245  |
| O  | -2.29568 | -1.32541 | 4.76387  |
| C  | -1.48792 | -0.85905 | 4.07245  |
| C  | 1.48792  | -0.85905 | 4.07245  |
| O  | 2.29568  | -1.32541 | 4.76387  |
| C  | 0.00000  | -1.90100 | 1.83011  |
| O  | 0.00000  | -2.99876 | 1.44039  |
| O  | -2.59700 | 1.49938  | 1.44039  |
| C  | -1.64631 | 0.95050  | 1.83011  |
| O  | 2.59700  | -1.49938 | -1.44039 |
| C  | 1.64631  | -0.95050 | -1.83011 |
| O  | 0.00000  | 2.99876  | -1.44039 |
| C  | 0.00000  | 1.90100  | -1.83011 |
| C  | 1.48792  | 0.85905  | -4.07245 |
| O  | 2.29568  | 1.32541  | -4.76387 |
| C  | -1.48792 | 0.85905  | -4.07245 |
| O  | -2.29568 | 1.32541  | -4.76387 |
| C  | 0.00000  | -1.71810 | -4.07245 |
| O  | -0.00000 | -2.65083 | -4.76387 |
| C  | -1.64631 | -0.95050 | -1.83011 |
| O  | -2.59700 | -1.49938 | -1.44039 |

SCF energy GEOPT = -1622.533459927 H

| Vibrational spectrum |      | wave number | IR intensity | selection rules |       |
|----------------------|------|-------------|--------------|-----------------|-------|
| #                    | mode | cm**(-1)    | km/mol       | IR              | RAMAN |
| 1                    | eu   | -15.07      | 0.00000      | YES             | NO    |
| 2                    | eu   | -15.07      | 0.00000      | YES             | NO    |
| 3                    |      | -0.00       | 0.00000      | -               | -     |
| 4                    |      | -0.00       | 0.00000      | -               | -     |
| 5                    |      | -0.00       | 0.00000      | -               | -     |
| 6                    |      | 0.00        | 0.00000      | -               | -     |
| 7                    |      | 0.00        | 0.00000      | -               | -     |
| 8                    |      | 0.00        | 0.00000      | -               | -     |
| 9                    | eg   | 10.83       | 0.00000      | NO              | YES   |
| 10                   | eg   | 10.83       | 0.00000      | NO              | YES   |
| 11                   | alu  | 11.82       | 0.00000      | NO              | NO    |
| 12                   | eu   | 14.34       | 0.03723      | YES             | NO    |
| 13                   | eu   | 14.34       | 0.03723      | YES             | NO    |
| 14                   | a2g  | 45.12       | 0.00000      | NO              | NO    |
| 15                   | alu  | 45.92       | 0.00000      | NO              | NO    |
| 16                   | alg  | 55.05       | 0.00000      | NO              | YES   |
| 17                   | eg   | 57.15       | 0.00000      | NO              | YES   |
| 18                   | eg   | 57.15       | 0.00000      | NO              | YES   |
| 19                   | eu   | 59.61       | 0.68971      | YES             | NO    |
| 20                   | eu   | 59.61       | 0.68971      | YES             | NO    |
| 21                   | eu   | 65.09       | 1.08091      | YES             | NO    |
| 22                   | eu   | 65.09       | 1.08091      | YES             | NO    |
| 23                   | eg   | 65.23       | 0.00000      | NO              | YES   |
| 24                   | eg   | 65.23       | 0.00000      | NO              | YES   |
| 25                   | a2u  | 66.79       | 2.04959      | YES             | NO    |
| 26                   | alg  | 82.13       | 0.00000      | NO              | YES   |
| 27                   | eg   | 83.38       | 0.00000      | NO              | YES   |
| 28                   | eg   | 83.38       | 0.00000      | NO              | YES   |
| 29                   | eu   | 91.83       | 0.43605      | YES             | NO    |
| 30                   | eu   | 91.83       | 0.43605      | YES             | NO    |
| 31                   | a2u  | 102.94      | 2.16686      | YES             | NO    |
| 32                   | alg  | 104.74      | 0.00000      | NO              | YES   |
| 33                   | a2u  | 162.91      | 5.18203      | YES             | NO    |
| 34                   | eg   | 336.63      | 0.00000      | NO              | YES   |
| 35                   | eg   | 336.63      | 0.00000      | NO              | YES   |
| 36                   | eu   | 338.30      | 1.22581      | YES             | NO    |
| 37                   | eu   | 338.30      | 1.22581      | YES             | NO    |
| 38                   | a2g  | 348.23      | 0.00000      | NO              | NO    |
| 39                   | alu  | 348.58      | 0.00000      | NO              | NO    |
| 40                   | alg  | 365.15      | 0.00000      | NO              | YES   |
| 41                   | a2u  | 366.93      | 24.23989     | YES             | NO    |
| 42                   | eg   | 374.61      | 0.00000      | NO              | YES   |
| 43                   | eg   | 374.61      | 0.00000      | NO              | YES   |
| 44                   | eu   | 375.13      | 35.85831     | YES             | NO    |
| 45                   | eu   | 375.13      | 35.85831     | YES             | NO    |
| 46                   | eu   | 385.85      | 0.43735      | YES             | NO    |
| 47                   | eu   | 385.85      | 0.43735      | YES             | NO    |
| 48                   | eg   | 386.14      | 0.00000      | NO              | YES   |
| 49                   | eg   | 386.14      | 0.00000      | NO              | YES   |
| 50                   | a2u  | 395.80      | 37.29611     | YES             | NO    |
| 51                   | alg  | 397.08      | 0.00000      | NO              | YES   |
| 52                   | eg   | 435.40      | 0.00000      | NO              | YES   |
| 53                   | eg   | 435.40      | 0.00000      | NO              | YES   |
| 54                   | eu   | 436.76      | 0.98869      | YES             | NO    |
| 55                   | eu   | 436.76      | 0.98869      | YES             | NO    |
| 56                   | a2u  | 441.03      | 8.83567      | YES             | NO    |
| 57                   | alg  | 444.57      | 0.00000      | NO              | YES   |
| 58                   | eg   | 476.20      | 0.00000      | NO              | YES   |
| 59                   | eg   | 476.20      | 0.00000      | NO              | YES   |
| 60                   | eu   | 476.75      | 3.51502      | YES             | NO    |
| 61                   | eu   | 476.75      | 3.51502      | YES             | NO    |
| 62                   | a2g  | 493.85      | 0.00000      | NO              | NO    |
| 63                   | alu  | 494.24      | 0.00000      | NO              | NO    |
| 64                   | a2u  | 531.41      | 229.85225    | YES             | NO    |
| 65                   | alg  | 537.10      | 0.00000      | NO              | YES   |
| 66                   | eu   | 542.45      | 54.26372     | YES             | NO    |
| 67                   | eu   | 542.45      | 54.26372     | YES             | NO    |
| 68                   | eg   | 543.16      | 0.00000      | NO              | YES   |
| 69                   | eg   | 543.16      | 0.00000      | NO              | YES   |
| 70                   | eg   | 1894.45     | 0.00000      | NO              | YES   |
| 71                   | eg   | 1894.45     | 0.00000      | NO              | YES   |
| 72                   | a2u  | 1901.01     | 3076.54607   | YES             | NO    |
| 73                   | alg  | 1910.43     | 0.00000      | NO              | YES   |
| 74                   | eu   | 1915.30     | 2561.68709   | YES             | NO    |
| 75                   | eu   | 1915.30     | 2561.68709   | YES             | NO    |
| 76                   | eg   | 1934.85     | 0.00000      | NO              | YES   |
| 77                   | eg   | 1934.85     | 0.00000      | NO              | YES   |
| 78                   | eu   | 1935.09     | 1366.03698   | YES             | NO    |
| 79                   | eu   | 1935.09     | 1366.03698   | YES             | NO    |
| 80                   | a2u  | 2007.07     | 1900.42628   | YES             | NO    |
| 81                   | alg  | 2031.13     | 0.00000      | NO              | YES   |

# Calculated Structure of $[Ag_2\{Nb(CO)_6\}_3]^- (C_2)$

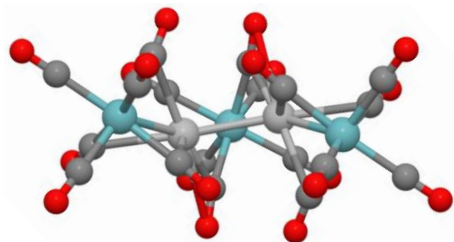

Symmetry: c2  
Method: (RI-)b-p/def2-TZVPP

|    |          |          |          |
|----|----------|----------|----------|
| Ag | -0.73791 | -1.18448 | -0.53588 |
| Nb | -0.00000 | 0.00000  | -3.06686 |
| O  | -0.32866 | 2.06058  | -5.58369 |
| C  | -0.25689 | 1.34323  | -4.67893 |
| C  | -2.22078 | -3.34131 | -0.19409 |
| O  | -2.29099 | -4.09517 | -1.07865 |
| C  | -2.95152 | -0.31137 | 0.68314  |
| O  | -3.44871 | 0.66116  | 0.28905  |
| C  | 0.98617  | -1.61986 | -2.03689 |
| O  | 1.71009  | -2.49063 | -1.76499 |
| Nb | -2.27668 | -2.13859 | 1.56951  |
| O  | -3.09181 | -1.12755 | -3.19382 |
| C  | -2.00078 | -0.75099 | -3.10928 |
| O  | -5.46333 | -2.93592 | 1.64689  |
| C  | -4.34238 | -2.64846 | 1.60949  |
| C  | -1.88327 | -3.96081 | 2.59065  |
| O  | -1.67551 | 4.96072  | 3.13784  |
| C  | -2.55968 | -1.13549 | 3.43019  |
| O  | -2.72599 | -0.59942 | 4.44107  |
| C  | -0.20757 | 1.77010  | 1.95947  |
| O  | 0.87894  | -1.64581 | 2.35338  |
| Ag | 0.73791  | 1.18448  | -0.53588 |
| O  | 0.32866  | -2.06058 | -5.58369 |
| C  | 0.25689  | -1.34323 | -4.67893 |
| C  | 2.22078  | 3.34131  | -0.19409 |
| O  | 2.29099  | 4.09517  | -1.07865 |
| C  | 2.95152  | 0.31137  | 0.68314  |
| O  | 3.44871  | -0.66116 | 0.28905  |
| C  | -0.98617 | 1.61986  | -2.03689 |
| O  | -1.71009 | 2.49063  | -1.76499 |
| Nb | -2.27668 | 2.13859  | 1.56951  |
| O  | 3.09181  | 1.12755  | -3.19382 |
| C  | 2.00078  | 0.75099  | -3.10928 |
| O  | 5.46333  | 2.93592  | 1.64689  |
| C  | 4.34238  | 2.64846  | 1.60949  |
| C  | 1.88327  | 3.96081  | 2.59065  |
| O  | 1.67551  | 4.96072  | 3.13784  |
| C  | 2.55968  | -1.13549 | 3.43019  |
| O  | 2.72599  | -0.59942 | 4.44107  |
| C  | -0.20757 | 1.77010  | 1.95947  |
| O  | -0.87894 | 1.64581  | 2.35338  |

SCF energy GEOPT = -2507.224133926 H  
ZPE = 367.0 kJ/mol  
FREEH energy = 509.60 kJ/mol  
FREEH entropy = 1.41442 kJ/mol

| # mode |   | symmetry | wave number<br>cm <sup>-1</sup> (-1) | IR intensity<br>km/mol | selection rules<br>IR RAMAN |
|--------|---|----------|--------------------------------------|------------------------|-----------------------------|
| 1      |   |          | -0.00                                | 0.00000                | - -                         |
| 2      |   |          | -0.00                                | 0.00000                | - -                         |
| 3      |   |          | -0.00                                | 0.00000                | - -                         |
| 4      |   |          | 0.00                                 | 0.00000                | - -                         |
| 5      |   |          | 0.00                                 | 0.00000                | - -                         |
| 6      |   |          | 0.00                                 | 0.00000                | - -                         |
| 7      | b |          | 7.15                                 | 0.00118                | YES YES                     |
| 8      | b |          | 14.00                                | 0.00057                | YES YES                     |
| 9      | a |          | 14.96                                | 0.07428                | YES YES                     |
| 10     | a |          | 18.03                                | 0.00372                | YES YES                     |
| 11     | b |          | 19.19                                | 0.03012                | YES YES                     |
| 12     | b |          | 24.07                                | 0.17494                | YES YES                     |
| 13     | a |          | 24.18                                | 0.28989                | YES YES                     |
| 14     | a |          | 27.11                                | 0.02752                | YES YES                     |
| 15     | b |          | 28.10                                | 0.09621                | YES YES                     |
| 16     | a |          | 30.77                                | 0.17882                | YES YES                     |
| 17     | b |          | 33.90                                | 0.00456                | YES YES                     |
| 18     | a |          | 36.25                                | 0.00014                | YES YES                     |
| 19     | b |          | 49.88                                | 0.13535                | YES YES                     |
| 20     | a |          | 52.33                                | 0.00383                | YES YES                     |

|     |   |         |            |         |
|-----|---|---------|------------|---------|
| 21  | b | 54.50   | 0.06272    | YES YES |
| 22  | a | 55.86   | 0.12374    | YES YES |
| 23  | a | 59.37   | 0.15900    | YES YES |
| 24  | b | 59.48   | 0.38424    | YES YES |
| 25  | a | 60.78   | 0.53224    | YES YES |
| 26  | b | 61.95   | 0.05492    | YES YES |
| 27  | b | 62.48   | 0.05819    | YES YES |
| 28  | a | 63.00   | 0.02985    | YES YES |
| 29  | a | 67.71   | 0.14595    | YES YES |
| 30  | b | 68.74   | 1.36447    | YES YES |
| 31  | a | 68.96   | 0.18672    | YES YES |
| 32  | b | 71.99   | 0.49217    | YES YES |
| 33  | b | 72.43   | 1.41403    | YES YES |
| 34  | a | 73.54   | 0.15657    | YES YES |
| 35  | b | 74.15   | 1.69969    | YES YES |
| 36  | a | 74.51   | 0.02964    | YES YES |
| 37  | a | 77.81   | 0.96377    | YES YES |
| 38  | a | 81.02   | 0.09945    | YES YES |
| 39  | b | 81.25   | 0.09409    | YES YES |
| 40  | b | 88.43   | 0.30301    | YES YES |
| 41  | b | 93.91   | 0.03005    | YES YES |
| 42  | a | 97.80   | 0.05941    | YES YES |
| 43  | b | 99.54   | 0.60375    | YES YES |
| 44  | a | 104.07  | 0.01759    | YES YES |
| 45  | a | 110.55  | 0.30467    | YES YES |
| 46  | b | 114.52  | 0.35355    | YES YES |
| 47  | a | 118.48  | 1.20695    | YES YES |
| 48  | b | 131.93  | 2.63084    | YES YES |
| 49  | a | 143.50  | 0.27700    | YES YES |
| 50  | b | 166.87  | 1.91358    | YES YES |
| 51  | a | 182.44  | 2.54328    | YES YES |
| 52  | b | 328.76  | 1.02190    | YES YES |
| 53  | a | 328.76  | 0.03682    | YES YES |
| 54  | b | 329.29  | 0.59155    | YES YES |
| 55  | a | 329.65  | 0.66028    | YES YES |
| 56  | a | 334.27  | 0.25295    | YES YES |
| 57  | b | 336.30  | 2.04496    | YES YES |
| 58  | b | 338.89  | 0.02929    | YES YES |
| 59  | a | 339.87  | 0.01201    | YES YES |
| 60  | b | 347.65  | 0.34967    | YES YES |
| 61  | a | 348.33  | 2.53223    | YES YES |
| 62  | b | 365.24  | 4.75803    | YES YES |
| 63  | b | 368.30  | 0.42586    | YES YES |
| 64  | a | 368.41  | 4.50621    | YES YES |
| 65  | b | 371.64  | 6.54638    | YES YES |
| 66  | a | 371.90  | 0.63639    | YES YES |
| 67  | b | 373.13  | 3.70510    | YES YES |
| 68  | a | 373.14  | 0.07945    | YES YES |
| 69  | a | 373.47  | 0.00860    | YES YES |
| 70  | b | 387.18  | 15.80975   | YES YES |
| 71  | a | 387.57  | 6.29169    | YES YES |
| 72  | b | 389.82  | 19.97096   | YES YES |
| 73  | b | 393.35  | 22.26771   | YES YES |
| 74  | a | 393.90  | 0.07181    | YES YES |
| 75  | a | 394.66  | 33.16627   | YES YES |
| 76  | b | 395.61  | 28.37231   | YES YES |
| 77  | b | 403.58  | 8.33454    | YES YES |
| 78  | a | 406.60  | 12.31125   | YES YES |
| 79  | a | 430.69  | 4.26405    | YES YES |
| 80  | b | 440.78  | 7.56569    | YES YES |
| 81  | a | 442.05  | 0.25397    | YES YES |
| 82  | b | 442.33  | 4.79416    | YES YES |
| 83  | b | 445.71  | 0.21695    | YES YES |
| 84  | b | 446.20  | 2.27291    | YES YES |
| 85  | b | 447.13  | 17.67921   | YES YES |
| 86  | a | 447.79  | 0.30042    | YES YES |
| 87  | a | 453.26  | 1.32520    | YES YES |
| 88  | a | 466.53  | 23.70581   | YES YES |
| 89  | b | 470.87  | 6.20104    | YES YES |
| 90  | a | 471.43  | 2.90917    | YES YES |
| 91  | b | 475.97  | 3.38372    | YES YES |
| 92  | a | 476.37  | 0.41889    | YES YES |
| 93  | b | 480.86  | 6.55454    | YES YES |
| 94  | a | 485.92  | 0.07198    | YES YES |
| 95  | b | 488.71  | 0.03030    | YES YES |
| 96  | a | 489.63  | 0.01862    | YES YES |
| 97  | b | 545.51  | 89.27153   | YES YES |
| 98  | a | 548.09  | 227.33718  | YES YES |
| 99  | b | 550.64  | 27.29041   | YES YES |
| 100 | b | 556.23  | 123.68533  | YES YES |
| 101 | a | 560.36  | 63.07573   | YES YES |
| 102 | b | 561.67  | 76.31702   | YES YES |
| 103 | a | 562.07  | 3.97008    | YES YES |
| 104 | b | 562.89  | 80.50319   | YES YES |
| 105 | a | 564.04  | 22.54474   | YES YES |
| 106 | b | 1890.57 | 147.28517  | YES YES |
| 107 | b | 1900.35 | 594.73196  | YES YES |
| 108 | a | 1901.58 | 190.45673  | YES YES |
| 109 | a | 1904.90 | 525.40232  | YES YES |
| 110 | a | 1911.97 | 1312.81855 | YES YES |
| 111 | b | 1914.81 | 2233.23393 | YES YES |
| 112 | a | 1927.39 | 343.54813  | YES YES |
| 113 | b | 1932.10 | 2080.84707 | YES YES |
| 114 | b | 1948.16 | 471.67373  | YES YES |
| 115 | a | 1949.29 | 43.01352   | YES YES |
| 116 | b | 1950.17 | 2689.50294 | YES YES |
| 117 | a | 1957.00 | 715.15009  | YES YES |
| 118 | b | 1957.37 | 29.28081   | YES YES |
| 119 | a | 1958.12 | 104.70841  | YES YES |
| 120 | b | 1958.58 | 1741.39253 | YES YES |
| 121 | a | 2015.01 | 2832.83969 | YES YES |
| 122 | b | 2022.85 | 1120.79542 | YES YES |
| 123 | a | 2044.29 | 4.04310    | YES YES |

### Calculated Structure of $[Ag_2\{Ta(CO)_6\}_3]^- (C_2)$

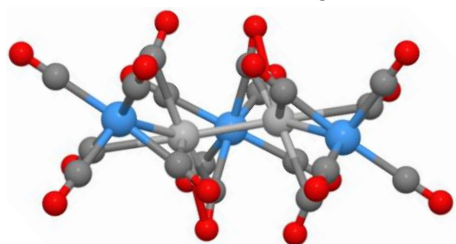

Symmetry: c2

Method: (RI-)b-p/def2-TZVPP

|    |          |          |          |
|----|----------|----------|----------|
| Ag | -0.74509 | -1.17576 | -0.53616 |
| Ta | 0.00000  | 0.00000  | -3.08080 |
| O  | -0.28694 | 2.06264  | -5.60835 |
| C  | -0.23104 | 1.34505  | -4.70137 |
| C  | -2.19788 | -3.35719 | -0.18266 |
| O  | -2.24276 | -4.11164 | -1.07001 |
| C  | -2.95789 | -0.31671 | 0.68815  |
| O  | -3.44680 | 0.65932  | 0.28875  |
| C  | 0.99079  | -1.61976 | -2.05327 |
| O  | 1.70608  | -2.49192 | -1.76071 |
| Ta | -2.28684 | -2.14657 | 1.57738  |
| O  | -3.09344 | -1.13885 | -3.18509 |
| C  | -2.00207 | -0.75770 | -3.11176 |
| O  | -5.47741 | -2.95006 | 1.59517  |
| C  | -4.35520 | -2.66103 | 1.58191  |
| C  | -1.90837 | -3.96742 | 2.61479  |
| O  | -1.71137 | -4.96464 | 3.17279  |
| C  | -2.59428 | -1.14461 | 3.43816  |
| O  | -2.77108 | -0.60927 | 4.44881  |
| C  | -0.21882 | -1.76935 | 1.97995  |
| O  | 0.87079  | -1.63284 | 2.36391  |
| Ag | 0.74509  | 1.17576  | -0.53616 |
| O  | 0.28694  | -2.06264 | -5.60835 |
| C  | 0.23104  | -1.34505 | -4.70137 |
| C  | 2.19788  | 3.35719  | -0.18266 |
| O  | 2.24276  | 4.11164  | -1.07001 |
| C  | 2.95789  | 0.31671  | 0.68815  |
| O  | 3.44680  | -0.65932 | 0.28875  |
| C  | -0.99079 | 1.61976  | -2.05327 |
| O  | -1.70608 | 2.49192  | -1.76071 |
| Ta | 2.28684  | 2.14657  | 1.57738  |
| O  | 3.09344  | 1.13885  | -3.18509 |
| C  | 2.00207  | 0.75770  | -3.11176 |
| O  | 5.47741  | 2.95006  | 1.59517  |
| C  | 4.35520  | 2.66103  | 1.58191  |
| C  | 1.90837  | 3.96742  | 2.61479  |
| O  | 1.71137  | 4.96464  | 3.17279  |
| C  | 2.59428  | 1.14461  | 3.43816  |
| O  | 2.77108  | 0.60927  | 4.44881  |
| C  | 0.21882  | 1.76935  | 1.97995  |
| O  | -0.87079 | 1.63284  | 2.36391  |

SCF energy GEOPT = -2507.364046323 H

| \$vibrational spectrum |          |                         |                        |                             |
|------------------------|----------|-------------------------|------------------------|-----------------------------|
| # mode                 | symmetry | wave number<br>cm**(-1) | IR intensity<br>km/mol | selection rules<br>IR RAMAN |
| 1                      |          | 0.00                    | 0.00000                | - -                         |
| 2                      |          | 0.00                    | 0.00000                | - -                         |
| 3                      |          | 0.00                    | 0.00000                | - -                         |
| 4                      |          | 0.00                    | 0.00000                | - -                         |
| 5                      |          | 0.00                    | 0.00000                | - -                         |
| 6                      |          | 0.00                    | 0.00000                | - -                         |
| 7                      | b        | 3.98                    | 0.00025                | YES YES                     |
| 8                      | b        | 12.92                   | 0.00084                | YES YES                     |
| 9                      | a        | 13.99                   | 0.06498                | YES YES                     |
| 10                     | a        | 16.43                   | 0.00318                | YES YES                     |
| 11                     | b        | 16.72                   | 0.02674                | YES YES                     |
| 12                     | a        | 22.74                   | 0.26603                | YES YES                     |
| 13                     | b        | 22.84                   | 0.15824                | YES YES                     |
| 14                     | a        | 26.30                   | 0.00102                | YES YES                     |
| 15                     | b        | 27.15                   | 0.06328                | YES YES                     |
| 16                     | a        | 29.39                   | 0.23211                | YES YES                     |
| 17                     | b        | 32.10                   | 0.01603                | YES YES                     |
| 18                     | a        | 33.77                   | 0.00002                | YES YES                     |
| 19                     | b        | 49.23                   | 0.06793                | YES YES                     |
| 20                     | a        | 52.24                   | 0.00410                | YES YES                     |
| 21                     | b        | 52.59                   | 0.18757                | YES YES                     |
| 22                     | a        | 56.42                   | 0.28856                | YES YES                     |
| 23                     | b        | 57.23                   | 0.51039                | YES YES                     |
| 24                     | a        | 57.31                   | 0.00609                | YES YES                     |
| 25                     | a        | 59.84                   | 0.28410                | YES YES                     |

|     |   |         |            |         |
|-----|---|---------|------------|---------|
| 26  | b | 61.26   | 0.26008    | YES YES |
| 27  | a | 61.76   | 0.23237    | YES YES |
| 28  | b | 61.91   | 0.13434    | YES YES |
| 29  | b | 65.95   | 1.33216    | YES YES |
| 30  | a | 67.59   | 0.13976    | YES YES |
| 31  | a | 67.95   | 0.17271    | YES YES |
| 32  | b | 70.53   | 0.18548    | YES YES |
| 33  | b | 70.78   | 1.25600    | YES YES |
| 34  | b | 72.03   | 1.08535    | YES YES |
| 35  | a | 73.02   | 0.11460    | YES YES |
| 36  | a | 75.81   | 0.05397    | YES YES |
| 37  | a | 76.96   | 0.73476    | YES YES |
| 38  | b | 79.82   | 0.56643    | YES YES |
| 39  | a | 81.75   | 0.08283    | YES YES |
| 40  | b | 82.74   | 0.11121    | YES YES |
| 41  | b | 93.42   | 0.02647    | YES YES |
| 42  | a | 93.74   | 0.18075    | YES YES |
| 43  | a | 98.36   | 0.01988    | YES YES |
| 44  | b | 99.34   | 0.51809    | YES YES |
| 45  | a | 105.78  | 1.24480    | YES YES |
| 46  | b | 108.90  | 0.61818    | YES YES |
| 47  | a | 112.79  | 0.17788    | YES YES |
| 48  | b | 125.68  | 2.41896    | YES YES |
| 49  | a | 134.81  | 0.59005    | YES YES |
| 50  | b | 159.60  | 1.80609    | YES YES |
| 51  | a | 177.20  | 2.64752    | YES YES |
| 52  | a | 336.73  | 0.03617    | YES YES |
| 53  | b | 337.24  | 1.24392    | YES YES |
| 54  | a | 337.59  | 0.83033    | YES YES |
| 55  | b | 337.72  | 1.98408    | YES YES |
| 56  | a | 338.92  | 0.19460    | YES YES |
| 57  | b | 344.91  | 2.69246    | YES YES |
| 58  | b | 347.73  | 0.04736    | YES YES |
| 59  | a | 348.72  | 0.04982    | YES YES |
| 60  | b | 352.96  | 0.39780    | YES YES |
| 61  | a | 353.83  | 4.28732    | YES YES |
| 62  | b | 362.94  | 12.09621   | YES YES |
| 63  | b | 365.83  | 12.09735   | YES YES |
| 64  | a | 366.11  | 16.21495   | YES YES |
| 65  | b | 371.64  | 22.97079   | YES YES |
| 66  | a | 371.96  | 4.64250    | YES YES |
| 67  | a | 374.22  | 5.30844    | YES YES |
| 68  | b | 374.35  | 28.15496   | YES YES |
| 69  | b | 381.51  | 22.09519   | YES YES |
| 70  | a | 383.64  | 0.83434    | YES YES |
| 71  | b | 384.07  | 0.64785    | YES YES |
| 72  | a | 384.42  | 0.27180    | YES YES |
| 73  | a | 387.14  | 2.10792    | YES YES |
| 74  | b | 387.51  | 0.45716    | YES YES |
| 75  | b | 393.32  | 7.98154    | YES YES |
| 76  | b | 393.77  | 19.20607   | YES YES |
| 77  | a | 394.31  | 22.97423   | YES YES |
| 78  | a | 400.80  | 17.81783   | YES YES |
| 79  | a | 427.87  | 1.84716    | YES YES |
| 80  | b | 433.89  | 6.85817    | YES YES |
| 81  | b | 435.77  | 0.84290    | YES YES |
| 82  | a | 435.99  | 0.08064    | YES YES |
| 83  | a | 437.74  | 0.26490    | YES YES |
| 84  | b | 438.37  | 15.67638   | YES YES |
| 85  | b | 441.93  | 0.24635    | YES YES |
| 86  | a | 442.86  | 0.05226    | YES YES |
| 87  | a | 452.93  | 5.25135    | YES YES |
| 88  | a | 463.28  | 25.96176   | YES YES |
| 89  | b | 473.32  | 5.73487    | YES YES |
| 90  | a | 473.72  | 1.80956    | YES YES |
| 91  | b | 477.46  | 3.59571    | YES YES |
| 92  | a | 478.13  | 0.48662    | YES YES |
| 93  | b | 480.68  | 12.53342   | YES YES |
| 94  | a | 487.09  | 0.01546    | YES YES |
| 95  | b | 492.05  | 0.02952    | YES YES |
| 96  | a | 492.99  | 0.02139    | YES YES |
| 97  | b | 523.10  | 49.60776   | YES YES |
| 98  | a | 524.90  | 129.88028  | YES YES |
| 99  | b | 528.98  | 27.93625   | YES YES |
| 100 | b | 531.47  | 78.96795   | YES YES |
| 101 | a | 534.28  | 43.11692   | YES YES |
| 102 | b | 540.38  | 39.65645   | YES YES |
| 103 | a | 540.89  | 4.72286    | YES YES |
| 104 | b | 541.19  | 50.52296   | YES YES |
| 105 | a | 541.92  | 11.12140   | YES YES |
| 106 | b | 1887.09 | 187.11427  | YES YES |
| 107 | b | 1896.85 | 485.33057  | YES YES |
| 108 | a | 1898.78 | 53.15319   | YES YES |
| 109 | a | 1901.60 | 837.29063  | YES YES |
| 110 | a | 1908.09 | 1168.08421 | YES YES |
| 111 | b | 1910.95 | 2346.27763 | YES YES |
| 112 | a | 1923.81 | 299.98369  | YES YES |
| 113 | b | 1928.28 | 2047.58886 | YES YES |
| 114 | b | 1944.18 | 858.19871  | YES YES |
| 115 | a | 1946.25 | 82.16806   | YES YES |
| 116 | b | 1947.07 | 2321.01458 | YES YES |
| 117 | a | 1953.45 | 705.77208  | YES YES |
| 118 | b | 1954.14 | 0.02300    | YES YES |
| 119 | a | 1954.84 | 123.18406  | YES YES |
| 120 | b | 1955.40 | 1803.01928 | YES YES |
| 121 | a | 2013.52 | 2890.42727 | YES YES |
| 122 | b | 2021.41 | 1163.93610 | YES YES |
| 123 | a | 2043.02 | 5.05609    | YES YES |

Calculated Structure of [Ag<sub>6</sub>{Nb(CO)<sub>6</sub>]<sub>5</sub>]<sup>+</sup> (C<sub>3h</sub>)

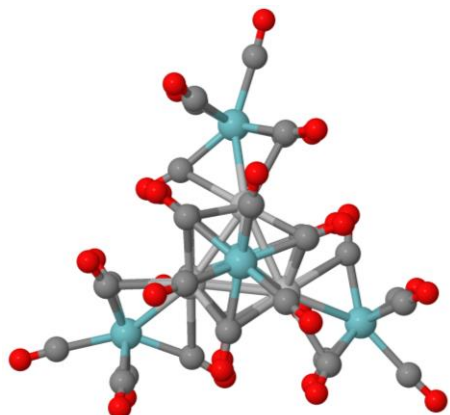

Symmetry: c3h  
Method: (RI-)b-p/def2-TZVPP

|    |          |          |          |
|----|----------|----------|----------|
| Ag | 1.32679  | -0.96544 | -1.41503 |
| Nb | 0.00000  | 0.00000  | -3.88394 |
| C  | -1.57395 | 1.31563  | -3.24429 |
| O  | -2.82322 | 2.16373  | 0.00000  |
| Ag | 0.17270  | 1.63175  | -1.41503 |
| Nb | 0.00000  | 0.00000  | 3.88394  |
| C  | 2.63948  | -3.08886 | 1.46377  |
| O  | 2.24441  | 3.90202  | 2.20183  |
| Nb | 3.65304  | -1.88338 | 0.00000  |
| Ag | -1.49949 | -0.66631 | -1.41503 |
| C  | 0.29731  | 1.67554  | -5.20230 |
| O  | -1.95494 | 5.23737  | 2.53500  |
| Nb | -0.19547 | 4.10531  | 0.00000  |
| Ag | 1.32679  | -0.96544 | 1.41503  |
| O  | -1.95494 | 5.23737  | -2.53500 |
| Nb | -3.45757 | -2.22194 | 0.00000  |
| Ag | 0.17270  | 1.63175  | 1.41503  |
| O  | 2.24441  | 3.90202  | -2.20183 |
| O  | -2.44098 | -0.88581 | 5.91585  |
| Ag | -1.49949 | -0.66631 | 1.41503  |
| O  | 0.45336  | 2.55686  | 5.91585  |
| O  | -2.46830 | 2.05155  | 3.18834  |
| O  | -4.50145 | -0.00729 | 2.20183  |
| C  | -3.99477 | -0.74143 | 1.46377  |
| O  | -0.46224 | -3.52684 | 0.00000  |
| O  | -4.50145 | -0.00729 | -2.20183 |
| C  | -1.80798 | 2.73270  | 0.00000  |
| O  | 1.98762  | -1.67105 | -5.91585 |
| O  | -0.54254 | -3.16339 | -3.18834 |
| O  | 3.01085  | 1.11184  | -3.18834 |
| C  | 3.27058  | 0.19941  | 0.00000  |
| O  | 5.51317  | -0.92566 | -2.53500 |
| O  | 5.94139  | -4.26426 | 0.00000  |
| O  | 3.01085  | 1.11184  | 3.18834  |
| O  | 3.28545  | 1.36311  | 0.00000  |
| O  | -3.55823 | -4.31172 | 2.53500  |
| O  | -6.66365 | -3.01327 | 0.00000  |
| C  | -1.46259 | -2.93211 | 0.00000  |
| O  | 2.25704  | -3.89473 | 2.20183  |
| C  | 1.35529  | 3.83029  | -1.46377 |
| C  | 1.30240  | -1.09524 | -5.20230 |
| C  | 4.87535  | -1.23619 | 1.63135  |
| O  | 0.72226  | 7.27752  | 0.00000  |
| O  | 1.98762  | -1.67105 | 5.91585  |
| C  | -3.99477 | -0.74143 | -1.46377 |
| C  | -0.35240 | -2.02089 | 3.24429  |
| C  | -1.36710 | 4.84027  | -1.63135 |
| C  | -1.57395 | 1.31563  | 3.24429  |
| O  | -3.55823 | -4.31172 | -2.53500 |
| O  | -0.54254 | -3.16339 | 3.18834  |
| O  | -2.46830 | 2.05155  | -3.18834 |
| C  | -1.36710 | 4.84027  | 1.63135  |
| O  | 5.51317  | -0.92566 | 2.53500  |
| O  | -2.44098 | -0.88581 | -5.91585 |
| O  | 0.45336  | 2.55686  | -5.91585 |

|   |          |          |          |
|---|----------|----------|----------|
| C | 1.35529  | 3.83029  | 1.46377  |
| C | 0.44651  | 6.16735  | 0.00000  |
| C | 1.92634  | 0.70526  | 3.24429  |
| O | 2.25704  | -3.89473 | -2.20183 |
| C | -5.56434 | -2.69699 | 0.00000  |
| C | 0.29731  | 1.67554  | 5.20230  |
| C | -1.59971 | -0.58029 | -5.20230 |
| C | -0.35240 | -2.02089 | -3.24429 |
| C | -1.59971 | -0.58029 | 5.20230  |
| C | 4.87535  | -1.23619 | -1.63135 |
| C | 1.92634  | 0.70526  | -3.24429 |
| C | -3.50825 | -3.60408 | -1.63135 |
| C | -3.50825 | -3.60408 | 1.63135  |
| C | 1.30240  | -1.09524 | 5.20230  |
| C | 2.63948  | -3.08886 | -1.46377 |
| C | 5.11783  | -3.47036 | 0.00000  |

SCF energy GEOOPT = -4570.847374715 H  
ZPE = 622.5 kJ/mol  
FREEH energy = 878.66 kJ/mol  
FREEH entropy = 2.27032 kJ/mol

| Vibrational spectrum |                | wave number           | IR intensity | selection rules |       |
|----------------------|----------------|-----------------------|--------------|-----------------|-------|
| # mode               | symmetry       | cm <sup>-1</sup> (-1) | km/mol       | IR              | RAMAN |
| 1                    |                | -0.00                 | 0.00000      | -               | -     |
| 2                    |                | -0.00                 | 0.00000      | -               | -     |
| 3                    |                | -0.00                 | 0.00000      | -               | -     |
| 4                    |                | -0.00                 | 0.00000      | -               | -     |
| 5                    |                | -0.00                 | 0.00000      | -               | -     |
| 6                    |                | 0.00                  | 0.00000      | -               | -     |
| 7                    | e <sup>g</sup> | 11.05                 | 0.00000      | NO              | YES   |
| 8                    | e <sup>g</sup> | 11.05                 | 0.00000      | NO              | YES   |
| 9                    | a <sup>g</sup> | 16.72                 | 0.10491      | YES             | NO    |
| 10                   | e <sup>g</sup> | 17.07                 | 0.02566      | YES             | YES   |
| 11                   | e <sup>g</sup> | 17.07                 | 0.02566      | YES             | YES   |
| 12                   | e <sup>g</sup> | 18.76                 | 0.00000      | NO              | YES   |
| 13                   | e <sup>g</sup> | 18.76                 | 0.00000      | NO              | YES   |
| 14                   | a <sup>g</sup> | 29.58                 | 0.00000      | NO              | YES   |
| 15                   | e <sup>g</sup> | 30.08                 | 0.00000      | NO              | YES   |
| 16                   | e <sup>g</sup> | 30.08                 | 0.00000      | NO              | YES   |
| 17                   | e <sup>g</sup> | 30.98                 | 0.12385      | YES             | YES   |
| 18                   | e <sup>g</sup> | 30.98                 | 0.12385      | YES             | YES   |
| 19                   | a <sup>g</sup> | 33.64                 | 0.11633      | YES             | NO    |
| 20                   | e <sup>g</sup> | 35.53                 | 0.07121      | YES             | YES   |
| 21                   | e <sup>g</sup> | 35.53                 | 0.07121      | YES             | YES   |
| 22                   | a <sup>g</sup> | 36.96                 | 0.01081      | YES             | NO    |
| 23                   | a <sup>g</sup> | 38.37                 | 0.07167      | YES             | NO    |
| 24                   | a <sup>g</sup> | 39.38                 | 0.00000      | NO              | YES   |
| 25                   | e <sup>g</sup> | 42.35                 | 0.00000      | NO              | YES   |
| 26                   | e <sup>g</sup> | 42.35                 | 0.00000      | NO              | YES   |
| 27                   | a <sup>g</sup> | 42.52                 | 0.00000      | NO              | YES   |
| 28                   | a <sup>g</sup> | 48.34                 | 0.52263      | YES             | NO    |
| 29                   | a <sup>g</sup> | 49.26                 | 0.00000      | NO              | YES   |
| 30                   | e <sup>g</sup> | 49.55                 | 0.32656      | YES             | YES   |
| 31                   | e <sup>g</sup> | 49.55                 | 0.32656      | YES             | YES   |
| 32                   | e <sup>g</sup> | 51.11                 | 0.00000      | NO              | YES   |
| 33                   | e <sup>g</sup> | 51.11                 | 0.00000      | NO              | YES   |
| 34                   | e <sup>g</sup> | 55.12                 | 0.80013      | YES             | YES   |
| 35                   | e <sup>g</sup> | 55.12                 | 0.80013      | YES             | YES   |
| 36                   | a <sup>g</sup> | 59.19                 | 0.00000      | NO              | YES   |
| 37                   | e <sup>g</sup> | 61.30                 | 0.00000      | NO              | YES   |
| 38                   | e <sup>g</sup> | 61.30                 | 0.00000      | NO              | YES   |
| 39                   | a <sup>g</sup> | 63.93                 | 0.00012      | YES             | NO    |
| 40                   | e <sup>g</sup> | 64.48                 | 0.12359      | YES             | YES   |
| 41                   | e <sup>g</sup> | 64.48                 | 0.12359      | YES             | YES   |
| 42                   | a <sup>g</sup> | 65.46                 | 0.00000      | NO              | YES   |
| 43                   | e <sup>g</sup> | 67.12                 | 0.00000      | NO              | YES   |
| 44                   | e <sup>g</sup> | 67.12                 | 0.00000      | NO              | YES   |
| 45                   | a <sup>g</sup> | 67.86                 | 0.42884      | YES             | NO    |
| 46                   | e <sup>g</sup> | 69.83                 | 0.02829      | YES             | YES   |
| 47                   | e <sup>g</sup> | 69.83                 | 0.02829      | YES             | YES   |
| 48                   | a <sup>g</sup> | 70.01                 | 0.00000      | NO              | YES   |
| 49                   | e <sup>g</sup> | 71.53                 | 0.11159      | YES             | YES   |
| 50                   | e <sup>g</sup> | 71.53                 | 0.11159      | YES             | YES   |
| 51                   | a <sup>g</sup> | 74.94                 | 0.00000      | NO              | YES   |
| 52                   | e <sup>g</sup> | 75.17                 | 0.00000      | NO              | YES   |
| 53                   | e <sup>g</sup> | 75.17                 | 0.00000      | NO              | YES   |
| 54                   | a <sup>g</sup> | 79.17                 | 0.81177      | YES             | NO    |
| 55                   | e <sup>g</sup> | 81.50                 | 0.00000      | NO              | YES   |
| 56                   | e <sup>g</sup> | 81.50                 | 0.00000      | NO              | YES   |
| 57                   | e <sup>g</sup> | 82.10                 | 1.35641      | YES             | YES   |
| 58                   | e <sup>g</sup> | 82.10                 | 1.35641      | YES             | YES   |
| 59                   | a <sup>g</sup> | 87.32                 | 0.00000      | NO              | YES   |
| 60                   | a <sup>g</sup> | 87.53                 | 0.07446      | YES             | NO    |
| 61                   | e <sup>g</sup> | 89.80                 | 0.00000      | NO              | YES   |
| 62                   | e <sup>g</sup> | 89.80                 | 0.00000      | NO              | YES   |
| 63                   | e <sup>g</sup> | 91.86                 | 0.36582      | YES             | YES   |
| 64                   | e <sup>g</sup> | 91.86                 | 0.36582      | YES             | YES   |
| 65                   | a <sup>g</sup> | 97.90                 | 0.00311      | YES             | NO    |
| 66                   | e <sup>g</sup> | 98.87                 | 0.32959      | YES             | YES   |
| 67                   | e <sup>g</sup> | 98.87                 | 0.32959      | YES             | YES   |
| 68                   | a <sup>g</sup> | 99.37                 | 0.00000      | NO              | YES   |
| 69                   | a <sup>g</sup> | 106.41                | 0.00000      | NO              | YES   |
| 70                   | e <sup>g</sup> | 108.01                | 0.00000      | NO              | YES   |
| 71                   | e <sup>g</sup> | 108.01                | 0.00000      | NO              | YES   |
| 72                   | a <sup>g</sup> | 111.20                | 0.87493      | YES             | NO    |
| 73                   | e <sup>g</sup> | 113.20                | 0.17610      | YES             | YES   |
| 74                   | e <sup>g</sup> | 113.20                | 0.17610      | YES             | YES   |
| 75                   | a <sup>g</sup> | 116.22                | 0.00000      | NO              | YES   |
| 76                   | e <sup>g</sup> | 121.40                | 0.79666      | YES             | YES   |
| 77                   | e <sup>g</sup> | 121.40                | 0.79666      | YES             | YES   |
| 78                   | e <sup>g</sup> | 122.17                | 0.00000      | NO              | YES   |
| 79                   | e <sup>g</sup> | 122.17                | 0.00000      | NO              | YES   |



|     |    |         |            |     |     |     |    |         |            |     |     |
|-----|----|---------|------------|-----|-----|-----|----|---------|------------|-----|-----|
| 80  | a" | 126.45  | 0.03101    | YES | NO  | 193 | e" | 1947.57 | 0.00000    | NO  | YES |
| 81  | a' | 130.29  | 0.00000    | NO  | YES | 194 | e" | 1947.57 | 0.00000    | NO  | YES |
| 82  | e" | 130.40  | 0.00000    | NO  | YES | 195 | a" | 1951.36 | 26.39492   | YES | NO  |
| 83  | e" | 130.40  | 0.00000    | NO  | YES | 196 | a' | 1957.44 | 0.00000    | NO  | YES |
| 84  | e' | 133.10  | 0.05059    | YES | YES | 197 | e' | 1965.37 | 1253.52491 | YES | YES |
| 85  | e' | 133.10  | 0.05059    | YES | YES | 198 | e' | 1965.37 | 1253.52491 | YES | YES |
| 86  | e" | 134.64  | 0.00000    | NO  | YES | 199 | e" | 2008.76 | 0.00000    | NO  | YES |
| 87  | e" | 134.64  | 0.00000    | NO  | YES | 200 | e" | 2008.76 | 0.00000    | NO  | YES |
| 88  | a" | 137.94  | 0.00103    | YES | NO  | 201 | a" | 2009.98 | 1297.61489 | YES | NO  |
| 89  | a' | 137.97  | 0.00000    | NO  | YES | 202 | a' | 2032.42 | 0.00000    | NO  | YES |
| 90  | e' | 160.55  | 1.18480    | YES | YES | 203 | e' | 2032.93 | 252.72285  | YES | YES |
| 91  | e' | 160.55  | 1.18480    | YES | YES | 204 | e' | 2032.93 | 252.72285  | YES | YES |
| 92  | a" | 168.25  | 1.44516    | YES | NO  | 205 | e" | 2040.00 | 0.00000    | NO  | YES |
| 93  | a' | 181.77  | 0.00000    | NO  | YES | 206 | e" | 2040.00 | 0.00000    | NO  | YES |
| 94  | e" | 319.82  | 0.00000    | NO  | YES | 207 | e' | 2040.67 | 841.91751  | YES | YES |
| 95  | e" | 319.82  | 0.00000    | NO  | YES | 208 | e' | 2040.67 | 841.91751  | YES | YES |
| 96  | e' | 319.97  | 0.61192    | YES | YES | 209 | a' | 2061.24 | 0.00000    | NO  | YES |
| 97  | e' | 319.97  | 0.61192    | YES | YES | 210 | e' | 2067.83 | 3480.66610 | YES | YES |
| 98  | a' | 327.22  | 0.00000    | NO  | YES | 211 | e' | 2067.83 | 3480.66610 | YES | YES |
| 99  | e' | 327.81  | 1.38025    | YES | YES | 212 | a" | 2075.07 | 4637.16055 | YES | NO  |
| 100 | e' | 327.81  | 1.38025    | YES | YES | 213 | a' | 2095.70 | 0.00000    | NO  | YES |
| 101 | a" | 330.37  | 0.05434    | YES | NO  |     |    |         |            |     |     |
| 102 | e" | 330.49  | 0.00000    | NO  | YES |     |    |         |            |     |     |
| 103 | e" | 330.49  | 0.00000    | NO  | YES |     |    |         |            |     |     |
| 104 | a" | 332.91  | 0.35322    | YES | NO  |     |    |         |            |     |     |
| 105 | e" | 333.31  | 0.00000    | NO  | YES |     |    |         |            |     |     |
| 106 | e" | 333.31  | 0.00000    | NO  | YES |     |    |         |            |     |     |
| 107 | a' | 334.80  | 0.00000    | NO  | YES |     |    |         |            |     |     |
| 108 | a" | 334.92  | 0.83732    | YES | NO  |     |    |         |            |     |     |
| 109 | e' | 342.60  | 7.18766    | YES | YES |     |    |         |            |     |     |
| 110 | e' | 342.60  | 7.18766    | YES | YES |     |    |         |            |     |     |
| 111 | a' | 342.83  | 0.00000    | NO  | YES |     |    |         |            |     |     |
| 112 | a" | 343.26  | 0.50004    | YES | NO  |     |    |         |            |     |     |
| 113 | a' | 344.07  | 0.00000    | NO  | YES |     |    |         |            |     |     |
| 114 | e" | 345.40  | 0.00000    | NO  | YES |     |    |         |            |     |     |
| 115 | e" | 345.40  | 0.00000    | NO  | YES |     |    |         |            |     |     |
| 116 | e' | 345.94  | 17.74225   | YES | YES |     |    |         |            |     |     |
| 117 | e' | 345.94  | 17.74225   | YES | YES |     |    |         |            |     |     |
| 118 | e' | 347.86  | 13.27856   | YES | YES |     |    |         |            |     |     |
| 119 | e' | 347.86  | 13.27856   | YES | YES |     |    |         |            |     |     |
| 120 | a' | 347.88  | 0.00000    | NO  | YES |     |    |         |            |     |     |
| 121 | e" | 359.56  | 0.00000    | NO  | YES |     |    |         |            |     |     |
| 122 | e" | 359.56  | 0.00000    | NO  | YES |     |    |         |            |     |     |
| 123 | a" | 359.75  | 0.77018    | YES | NO  |     |    |         |            |     |     |
| 124 | a' | 378.49  | 0.00000    | NO  | YES |     |    |         |            |     |     |
| 125 | a" | 379.67  | 56.00795   | YES | NO  |     |    |         |            |     |     |
| 126 | e" | 380.17  | 0.00000    | NO  | YES |     |    |         |            |     |     |
| 127 | e" | 380.17  | 0.00000    | NO  | YES |     |    |         |            |     |     |
| 128 | a" | 381.15  | 69.54198   | YES | NO  |     |    |         |            |     |     |
| 129 | e' | 381.71  | 43.13813   | YES | YES |     |    |         |            |     |     |
| 130 | e' | 381.71  | 43.13813   | YES | YES |     |    |         |            |     |     |
| 131 | a' | 384.22  | 0.00000    | NO  | YES |     |    |         |            |     |     |
| 132 | e' | 384.39  | 24.50381   | YES | YES |     |    |         |            |     |     |
| 133 | e' | 384.39  | 24.50381   | YES | YES |     |    |         |            |     |     |
| 134 | e" | 384.48  | 0.00000    | NO  | YES |     |    |         |            |     |     |
| 135 | e" | 384.48  | 0.00000    | NO  | YES |     |    |         |            |     |     |
| 136 | e' | 408.73  | 2.37949    | YES | YES |     |    |         |            |     |     |
| 137 | e' | 408.73  | 2.37949    | YES | YES |     |    |         |            |     |     |
| 138 | a' | 409.15  | 0.00000    | NO  | YES |     |    |         |            |     |     |
| 139 | a' | 420.91  | 0.00000    | NO  | YES |     |    |         |            |     |     |
| 140 | e' | 422.02  | 2.94422    | YES | YES |     |    |         |            |     |     |
| 141 | e' | 422.02  | 2.94422    | YES | YES |     |    |         |            |     |     |
| 142 | e' | 438.87  | 1.61483    | YES | YES |     |    |         |            |     |     |
| 143 | e' | 438.87  | 1.61483    | YES | YES |     |    |         |            |     |     |
| 144 | a' | 439.17  | 0.00000    | NO  | YES |     |    |         |            |     |     |
| 145 | e" | 440.02  | 0.00000    | NO  | YES |     |    |         |            |     |     |
| 146 | e" | 440.02  | 0.00000    | NO  | YES |     |    |         |            |     |     |
| 147 | e' | 441.36  | 9.07092    | YES | YES |     |    |         |            |     |     |
| 148 | e' | 441.36  | 9.07092    | YES | YES |     |    |         |            |     |     |
| 149 | e" | 445.38  | 0.00000    | NO  | YES |     |    |         |            |     |     |
| 150 | e" | 445.38  | 0.00000    | NO  | YES |     |    |         |            |     |     |
| 151 | a" | 445.71  | 1.66204    | YES | NO  |     |    |         |            |     |     |
| 152 | a' | 446.95  | 0.00000    | NO  | YES |     |    |         |            |     |     |
| 153 | a" | 449.00  | 8.01291    | YES | NO  |     |    |         |            |     |     |
| 154 | e' | 453.52  | 14.36297   | YES | YES |     |    |         |            |     |     |
| 155 | e' | 453.52  | 14.36297   | YES | YES |     |    |         |            |     |     |
| 156 | e" | 453.99  | 0.00000    | NO  | YES |     |    |         |            |     |     |
| 157 | e" | 453.99  | 0.00000    | NO  | YES |     |    |         |            |     |     |
| 158 | e" | 466.00  | 0.00000    | NO  | YES |     |    |         |            |     |     |
| 159 | e" | 466.00  | 0.00000    | NO  | YES |     |    |         |            |     |     |
| 160 | a" | 466.17  | 22.25298   | YES | NO  |     |    |         |            |     |     |
| 161 | e' | 471.21  | 1.55417    | YES | YES |     |    |         |            |     |     |
| 162 | e' | 471.21  | 1.55417    | YES | YES |     |    |         |            |     |     |
| 163 | a' | 471.32  | 0.00000    | NO  | YES |     |    |         |            |     |     |
| 164 | a" | 471.85  | 10.82692   | YES | NO  |     |    |         |            |     |     |
| 165 | a' | 472.41  | 0.00000    | NO  | YES |     |    |         |            |     |     |
| 166 | a" | 478.06  | 0.00296    | YES | NO  |     |    |         |            |     |     |
| 167 | e" | 478.14  | 0.00000    | NO  | YES |     |    |         |            |     |     |
| 168 | e" | 478.14  | 0.00000    | NO  | YES |     |    |         |            |     |     |
| 169 | a' | 523.86  | 0.00000    | NO  | YES |     |    |         |            |     |     |
| 170 | a" | 524.04  | 379.80397  | YES | NO  |     |    |         |            |     |     |
| 171 | a' | 533.63  | 0.00000    | NO  | YES |     |    |         |            |     |     |
| 172 | e" | 534.16  | 0.00000    | NO  | YES |     |    |         |            |     |     |
| 173 | e" | 534.16  | 0.00000    | NO  | YES |     |    |         |            |     |     |
| 174 | e' | 534.23  | 0.99728    | YES | YES |     |    |         |            |     |     |
| 175 | e' | 534.23  | 0.99728    | YES | YES |     |    |         |            |     |     |
| 176 | e' | 536.07  | 91.30455   | YES | YES |     |    |         |            |     |     |
| 177 | e' | 536.07  | 91.30455   | YES | YES |     |    |         |            |     |     |
| 178 | e' | 539.54  | 243.84618  | YES | YES |     |    |         |            |     |     |
| 179 | e' | 539.54  | 243.84618  | YES | YES |     |    |         |            |     |     |
| 180 | e" | 540.61  | 0.00000    | NO  | YES |     |    |         |            |     |     |
| 181 | e" | 540.61  | 0.00000    | NO  | YES |     |    |         |            |     |     |
| 182 | a" | 541.34  | 93.42558   | YES | NO  |     |    |         |            |     |     |
| 183 | a' | 543.75  | 0.00000    | NO  | YES |     |    |         |            |     |     |
| 184 | a' | 1896.94 | 0.00000    | NO  | YES |     |    |         |            |     |     |
| 185 | e' | 1901.53 | 380.73626  | YES | YES |     |    |         |            |     |     |
| 186 | e' | 1901.53 | 380.73626  | YES | YES |     |    |         |            |     |     |
| 187 | e" | 1919.59 | 0.00000    | NO  | YES |     |    |         |            |     |     |
| 188 | e" | 1919.59 | 0.00000    | NO  | YES |     |    |         |            |     |     |
| 189 | e' | 1928.66 | 434.34032  | YES | YES |     |    |         |            |     |     |
| 190 | e' | 1928.66 | 434.34032  | YES | YES |     |    |         |            |     |     |
| 191 | a" | 1936.11 | 1204.90722 | YES | NO  |     |    |         |            |     |     |
| 192 | a' | 1942.15 | 0.00000    | NO  | YES |     |    |         |            |     |     |

### Calculated Structure of $[Ag_6\{Nb(CO)_6\}_4]^{2+}$ (T)

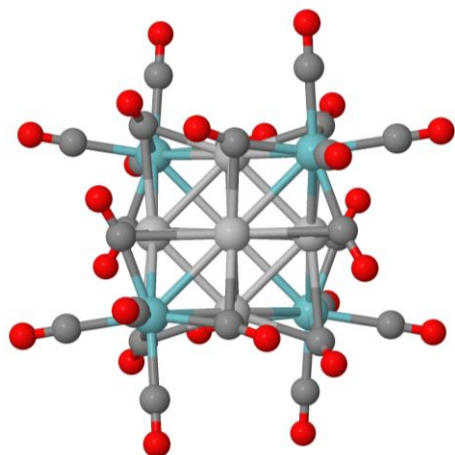

Symmetry: t  
Method: (RI-)b-p/def2-TZVPP

|    |          |          |          |
|----|----------|----------|----------|
| Ag | -0.00000 | 0.00000  | 2.05523  |
| Ag | 2.05523  | -0.00000 | -0.00000 |
| Ag | -2.05523 | 0.00000  | 0.00000  |
| Ag | -0.00000 | -2.05523 | 0.00000  |
| Ag | 0.00000  | 2.05523  | -0.00000 |
| Ag | 0.00000  | -0.00000 | -2.05523 |
| Nb | -2.08876 | -2.08876 | 2.08876  |
| Nb | -2.08876 | 2.08876  | -2.08876 |
| Nb | 2.08876  | 2.08876  | 2.08876  |
| O  | 3.37570  | 0.88298  | -2.64146 |
| Nb | 2.08876  | -2.08876 | -2.08876 |
| O  | 2.62186  | -1.90566 | -5.34750 |
| O  | 2.64146  | -3.37570 | 0.88298  |
| O  | -0.88298 | -2.64146 | -3.37570 |
| O  | -1.90566 | 5.34750  | -2.62186 |
| O  | 0.88298  | 2.64146  | -3.37570 |
| O  | -3.37570 | 0.88298  | 2.64146  |
| O  | -2.64146 | -3.37570 | -0.88298 |
| O  | -5.34750 | -2.62186 | 1.90566  |
| O  | 0.88298  | -2.64146 | 3.37570  |
| O  | -1.90566 | -5.34750 | 2.62186  |
| O  | -3.37570 | -0.88298 | -2.64146 |
| O  | 1.90566  | -5.34750 | -2.62186 |
| O  | -2.64146 | 3.37570  | 0.88298  |
| O  | 2.62186  | 1.90566  | 5.34750  |
| O  | -5.34750 | 2.62186  | -1.90566 |
| O  | 5.34750  | -2.62186 | -1.90566 |
| O  | 5.34750  | 2.62186  | 1.90566  |
| O  | 3.37570  | -0.88298 | 2.64146  |
| O  | -2.62186 | 1.90566  | -5.34750 |
| O  | -0.88298 | 2.64146  | 3.37570  |
| O  | 2.64146  | 3.37570  | -0.88298 |
| O  | 1.90566  | 5.34750  | 2.62186  |
| O  | -2.62186 | -1.90566 | 5.34750  |
| C  | -2.81547 | -0.07595 | 2.30554  |
| C  | 4.22469  | -2.42931 | -1.96128 |
| C  | -1.96128 | -4.22469 | 2.42931  |
| C  | -1.96128 | 4.22469  | -2.42931 |
| C  | -2.30554 | 2.81547  | -0.07595 |
| C  | -0.07595 | -2.30554 | 2.81547  |
| C  | -2.81547 | 0.07595  | -2.30554 |
| C  | -2.30554 | -2.81547 | 0.07595  |
| C  | 2.30554  | -2.81547 | -0.07595 |
| C  | -4.22469 | -2.42931 | 1.96128  |
| C  | 1.96128  | -4.22469 | -2.42931 |
| C  | 2.81547  | -0.07595 | -2.30554 |
| C  | 2.42931  | 1.96128  | 4.22469  |
| C  | 2.30554  | 2.81547  | 0.07595  |
| C  | -0.07595 | 2.30554  | -2.81547 |
| C  | 0.07595  | -2.30554 | -2.81547 |
| C  | -4.22469 | 2.42931  | -1.96128 |
| C  | 2.81547  | 0.07595  | 2.30554  |
| C  | -2.42931 | -1.96128 | 4.22469  |

|   |          |          |          |
|---|----------|----------|----------|
| C | -2.42931 | 1.96128  | -4.22469 |
| C | 0.07595  | 2.30554  | 2.81547  |
| C | 4.22469  | 2.42931  | 1.96128  |
| C | 1.96128  | 4.22469  | 2.42931  |
| C | 2.42931  | -1.96128 | -4.22469 |

SCF energy GEOOPT = -3832.916269829 H  
ZPE = 501.3 kJ/mol  
FREEH energy = 711.80 kJ/mol  
FREEH entropy = 1.86279 kJ/mol

| Vibrational spectrum |          | wave number<br>cm**(-1) | IR intensity<br>km/mol | selection rules |       |
|----------------------|----------|-------------------------|------------------------|-----------------|-------|
| # mode               | symmetry |                         |                        | IR              | RAMAN |
| 1                    |          | -0.00                   | 0.00000                | -               | -     |
| 2                    |          | -0.00                   | 0.00000                | -               | -     |
| 3                    |          | -0.00                   | 0.00000                | -               | -     |
| 4                    |          | 0.00                    | 0.00000                | -               | -     |
| 5                    |          | 0.00                    | 0.00000                | -               | -     |
| 6                    |          | 0.00                    | 0.00000                | -               | -     |
| 7                    | e        | 22.98                   | 0.00000                | NO              | YES   |
| 8                    | e        | 22.98                   | 0.00000                | NO              | YES   |
| 9                    | t        | 26.48                   | 0.11237                | YES             | YES   |
| 10                   | t        | 26.48                   | 0.11234                | YES             | YES   |
| 11                   | t        | 26.48                   | 0.11234                | YES             | YES   |
| 12                   | e        | 28.36                   | 0.00000                | NO              | YES   |
| 13                   | t        | 32.85                   | 0.00491                | YES             | YES   |
| 14                   | t        | 32.85                   | 0.00491                | YES             | YES   |
| 15                   | t        | 32.85                   | 0.00488                | YES             | YES   |
| 16                   | t        | 35.50                   | 0.05331                | YES             | YES   |
| 17                   | t        | 35.50                   | 0.05332                | YES             | YES   |
| 18                   | t        | 35.51                   | 0.05328                | YES             | YES   |
| 19                   | t        | 46.89                   | 0.04547                | YES             | YES   |
| 20                   | t        | 46.89                   | 0.04545                | YES             | YES   |
| 21                   | t        | 46.89                   | 0.04546                | YES             | YES   |
| 22                   | e        | 49.47                   | 0.00000                | NO              | YES   |
| 23                   | e        | 49.47                   | 0.00000                | NO              | YES   |
| 24                   | t        | 52.31                   | 0.33554                | YES             | YES   |
| 25                   | t        | 52.31                   | 0.33555                | YES             | YES   |
| 26                   | t        | 52.31                   | 0.33554                | YES             | YES   |
| 27                   | e        | 55.46                   | 0.00000                | NO              | YES   |
| 28                   | e        | 55.46                   | 0.00000                | NO              | YES   |
| 29                   | t        | 61.03                   | 0.33948                | YES             | YES   |
| 30                   | t        | 61.03                   | 0.33942                | YES             | YES   |
| 31                   | t        | 61.03                   | 0.33939                | YES             | YES   |
| 32                   | e        | 66.61                   | 0.00000                | NO              | YES   |
| 33                   | t        | 71.10                   | 0.08085                | YES             | YES   |
| 34                   | t        | 71.10                   | 0.08089                | YES             | YES   |
| 35                   | t        | 71.10                   | 0.08087                | YES             | YES   |
| 36                   | e        | 72.70                   | 0.00000                | NO              | YES   |
| 37                   | t        | 73.78                   | 0.00108                | YES             | YES   |
| 38                   | t        | 73.78                   | 0.00108                | YES             | YES   |
| 39                   | t        | 73.78                   | 0.00109                | YES             | YES   |
| 40                   | e        | 73.97                   | 0.00000                | NO              | YES   |
| 41                   | e        | 73.98                   | 0.00000                | NO              | YES   |
| 42                   | t        | 77.07                   | 0.01200                | YES             | YES   |
| 43                   | t        | 77.07                   | 0.01196                | YES             | YES   |
| 44                   | t        | 77.07                   | 0.01198                | YES             | YES   |
| 45                   | t        | 83.97                   | 1.06137                | YES             | YES   |
| 46                   | t        | 83.97                   | 1.06158                | YES             | YES   |
| 47                   | t        | 83.97                   | 1.06138                | YES             | YES   |
| 48                   | t        | 90.30                   | 1.39644                | YES             | YES   |
| 49                   | t        | 90.30                   | 1.39636                | YES             | YES   |
| 50                   | t        | 90.30                   | 1.39658                | YES             | YES   |
| 51                   | e        | 91.34                   | 0.00000                | NO              | YES   |
| 52                   | e        | 91.34                   | 0.00000                | NO              | YES   |
| 53                   | t        | 97.45                   | 0.00315                | YES             | YES   |
| 54                   | t        | 97.45                   | 0.00312                | YES             | YES   |
| 55                   | t        | 97.45                   | 0.00315                | YES             | YES   |
| 56                   | t        | 98.23                   | 0.14648                | YES             | YES   |
| 57                   | t        | 98.23                   | 0.14653                | YES             | YES   |
| 58                   | t        | 98.23                   | 0.14645                | YES             | YES   |
| 59                   | e        | 113.76                  | 0.00000                | NO              | YES   |
| 60                   | t        | 114.83                  | 0.06968                | YES             | YES   |
| 61                   | t        | 114.83                  | 0.06968                | YES             | YES   |
| 62                   | t        | 114.83                  | 0.06968                | YES             | YES   |
| 63                   | e        | 125.96                  | 0.00000                | NO              | YES   |
| 64                   | e        | 126.80                  | 0.00000                | NO              | YES   |
| 65                   | e        | 126.81                  | 0.00000                | NO              | YES   |
| 66                   | t        | 129.11                  | 0.19908                | YES             | YES   |
| 67                   | t        | 129.11                  | 0.19914                | YES             | YES   |
| 68                   | t        | 129.11                  | 0.19912                | YES             | YES   |
| 69                   | t        | 136.52                  | 0.30399                | YES             | YES   |
| 70                   | t        | 136.52                  | 0.30401                | YES             | YES   |
| 71                   | t        | 136.52                  | 0.30404                | YES             | YES   |
| 72                   | t        | 145.49                  | 0.00125                | YES             | YES   |
| 73                   | t        | 145.49                  | 0.00125                | YES             | YES   |
| 74                   | t        | 145.49                  | 0.00125                | YES             | YES   |
| 75                   | e        | 147.96                  | 0.00000                | NO              | YES   |
| 76                   | t        | 164.78                  | 0.23844                | YES             | YES   |
| 77                   | t        | 164.78                  | 0.23844                | YES             | YES   |
| 78                   | t        | 164.78                  | 0.23844                | YES             | YES   |
| 79                   | e        | 319.16                  | 0.00000                | NO              | YES   |
| 80                   | e        | 319.16                  | 0.00000                | NO              | YES   |
| 81                   | t        | 319.61                  | 0.05238                | YES             | YES   |
| 82                   | t        | 319.62                  | 0.05219                | YES             | YES   |
| 83                   | t        | 319.62                  | 0.05241                | YES             | YES   |
| 84                   | t        | 321.09                  | 1.98866                | YES             | YES   |
| 85                   | t        | 321.09                  | 1.98907                | YES             | YES   |
| 86                   | t        | 321.09                  | 1.98901                | YES             | YES   |
| 87                   | t        | 334.10                  | 0.05778                | YES             | YES   |
| 88                   | t        | 334.10                  | 0.05756                | YES             | YES   |
| 89                   | t        | 334.10                  | 0.05765                | YES             | YES   |
| 90                   | t        | 336.17                  | 14.46488               | YES             | YES   |
| 91                   | t        | 336.17                  | 14.48537               | YES             | YES   |
| 92                   | t        | 336.17                  | 14.48324               | YES             | YES   |
| 93                   | e        | 336.33                  | 0.00000                | NO              | YES   |
| 94                   | e        | 336.33                  | 0.00000                | NO              | YES   |

|     |   |         |            |     |     |
|-----|---|---------|------------|-----|-----|
| 95  | t | 336.37  | 10.16940   | YES | YES |
| 96  | t | 336.38  | 10.16717   | YES | YES |
| 97  | t | 336.38  | 10.18898   | YES | YES |
| 98  | e | 337.04  | 0.00000    | NO  | YES |
| 99  | e | 338.09  | 0.00000    | NO  | YES |
| 100 | t | 338.31  | 10.07548   | YES | YES |
| 101 | t | 338.31  | 10.07622   | YES | YES |
| 102 | t | 338.31  | 10.07672   | YES | YES |
| 103 | t | 371.62  | 71.26247   | YES | YES |
| 104 | t | 371.62  | 71.26314   | YES | YES |
| 105 | t | 371.62  | 71.26299   | YES | YES |
| 106 | e | 376.20  | 0.00000    | NO  | YES |
| 107 | e | 381.47  | 0.00000    | NO  | YES |
| 108 | e | 381.47  | 0.00000    | NO  | YES |
| 109 | t | 382.57  | 3.84334    | YES | YES |
| 110 | t | 382.57  | 3.84608    | YES | YES |
| 111 | t | 382.57  | 3.84388    | YES | YES |
| 112 | t | 387.92  | 12.97405   | YES | YES |
| 113 | t | 387.92  | 12.97236   | YES | YES |
| 114 | t | 387.92  | 12.97564   | YES | YES |
| 115 | t | 432.79  | 0.43275    | YES | YES |
| 116 | t | 432.79  | 0.43317    | YES | YES |
| 117 | t | 432.79  | 0.43296    | YES | YES |
| 118 | t | 434.28  | 7.44390    | YES | YES |
| 119 | t | 434.28  | 7.44374    | YES | YES |
| 120 | t | 434.28  | 7.44431    | YES | YES |
| 121 | e | 434.88  | 0.00000    | NO  | YES |
| 122 | e | 434.88  | 0.00000    | NO  | YES |
| 123 | t | 442.90  | 7.47188    | YES | YES |
| 124 | t | 442.90  | 7.47152    | YES | YES |
| 125 | t | 442.90  | 7.47179    | YES | YES |
| 126 | e | 445.95  | 0.00000    | NO  | YES |
| 127 | t | 456.77  | 0.02584    | YES | YES |
| 128 | t | 456.77  | 0.02571    | YES | YES |
| 129 | t | 456.77  | 0.02596    | YES | YES |
| 130 | e | 461.14  | 0.00000    | NO  | YES |
| 131 | e | 461.14  | 0.00000    | NO  | YES |
| 132 | t | 461.71  | 7.54792    | YES | YES |
| 133 | t | 461.71  | 7.55549    | YES | YES |
| 134 | t | 461.71  | 7.55216    | YES | YES |
| 135 | e | 462.00  | 0.00000    | NO  | YES |
| 136 | t | 462.94  | 11.30788   | YES | YES |
| 137 | t | 462.94  | 11.30930   | YES | YES |
| 138 | t | 462.94  | 11.31412   | YES | YES |
| 139 | t | 523.17  | 263.36322  | YES | YES |
| 140 | t | 523.17  | 263.38672  | YES | YES |
| 141 | t | 523.17  | 263.39234  | YES | YES |
| 142 | t | 528.40  | 1.97854    | YES | YES |
| 143 | t | 528.40  | 1.97726    | YES | YES |
| 144 | t | 528.40  | 1.97818    | YES | YES |
| 145 | e | 529.71  | 0.00000    | NO  | YES |
| 146 | e | 529.71  | 0.00000    | NO  | YES |
| 147 | t | 531.32  | 94.15525   | YES | YES |
| 148 | t | 531.32  | 94.13395   | YES | YES |
| 149 | t | 531.32  | 94.12793   | YES | YES |
| 150 | e | 533.44  | 0.00000    | NO  | YES |
| 151 | t | 1914.30 | 28.71881   | YES | YES |
| 152 | t | 1914.30 | 28.71925   | YES | YES |
| 153 | t | 1914.30 | 28.71887   | YES | YES |
| 154 | e | 1914.59 | 0.00000    | NO  | YES |
| 155 | e | 1914.59 | 0.00000    | NO  | YES |
| 156 | t | 1934.58 | 392.56880  | YES | YES |
| 157 | t | 1934.58 | 392.56411  | YES | YES |
| 158 | t | 1934.58 | 392.56262  | YES | YES |
| 159 | t | 1952.60 | 685.26579  | YES | YES |
| 160 | t | 1952.60 | 685.26392  | YES | YES |
| 161 | t | 1952.60 | 685.25926  | YES | YES |
| 162 | a | 1958.06 | 0.00000    | NO  | YES |
| 163 | t | 2069.50 | 6.01825    | YES | YES |
| 164 | t | 2069.50 | 6.01828    | YES | YES |
| 165 | t | 2069.50 | 6.01826    | YES | YES |
| 166 | t | 2073.29 | 986.76978  | YES | YES |
| 167 | t | 2073.29 | 986.76950  | YES | YES |
| 168 | t | 2073.29 | 986.76954  | YES | YES |
| 169 | e | 2073.55 | 0.00000    | NO  | YES |
| 170 | e | 2073.55 | 0.00000    | NO  | YES |
| 171 | t | 2095.62 | 2997.45788 | YES | YES |
| 172 | t | 2095.62 | 2997.45770 | YES | YES |
| 173 | t | 2095.62 | 2997.45843 | YES | YES |
| 174 | a | 2118.00 | 0.00000    | NO  | YES |

### Calculated Structure of $[Ag_6\{Ta(CO)_6\}_4]^{2+} (T)$

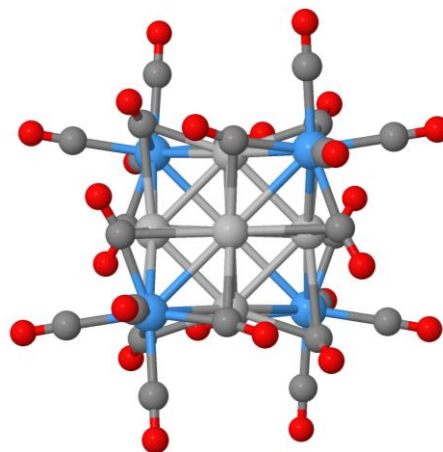

Symmetry: t  
Method: (RI-)b-p/def2-TZVPP

|    |          |          |          |
|----|----------|----------|----------|
| Ag | -0.00000 | 0.00000  | 2.05308  |
| Ag | 2.05308  | -0.00000 | -0.00000 |
| Ag | -2.05308 | 0.00000  | 0.00000  |
| Ag | -0.00000 | -2.05308 | 0.00000  |
| Ag | 0.00000  | 2.05308  | -0.00000 |
| Ag | 0.00000  | -0.00000 | -2.05308 |
| Ta | -2.09761 | -2.09761 | 2.09761  |
| Ta | -2.09761 | 2.09761  | -2.09761 |
| Ta | 2.09761  | 2.09761  | 2.09761  |
| O  | 3.37902  | 0.88619  | -2.64222 |
| Ta | -2.09761 | -2.09761 | -2.09761 |
| O  | 2.62843  | -1.92400 | -5.35983 |
| O  | -2.64222 | -3.37902 | 0.88619  |
| O  | -0.88619 | -2.64222 | -3.37902 |
| O  | -1.92400 | 5.35983  | -2.62843 |
| O  | 0.88619  | 2.64222  | -3.37902 |
| O  | -3.37902 | 0.88619  | 2.64222  |
| O  | -2.64222 | -3.37902 | -0.88619 |
| O  | -5.35983 | -2.62843 | 1.92400  |
| O  | 0.88619  | -2.64222 | 3.37902  |
| O  | -1.92400 | -5.35983 | 2.62843  |
| O  | -3.37902 | -0.88619 | -2.64222 |
| O  | 1.92400  | -5.35983 | -2.62843 |
| O  | -2.64222 | 3.37902  | 0.88619  |
| O  | 2.62843  | 1.92400  | 5.35983  |
| O  | -5.35983 | 2.62843  | -1.92400 |
| O  | 5.35983  | -2.62843 | -1.92400 |
| O  | 3.37902  | -0.88619 | 2.64222  |
| O  | -2.62843 | 1.92400  | -5.35983 |
| O  | -0.88619 | 2.64222  | 3.37902  |
| O  | 2.64222  | 3.37902  | -0.88619 |
| O  | 1.92400  | 5.35983  | 2.62843  |
| O  | -2.62843 | -1.92400 | 5.35983  |
| C  | -2.82657 | -0.08267 | 2.31923  |
| C  | 4.23591  | -2.43628 | -1.97602 |
| C  | -1.97602 | -4.23591 | 2.43628  |
| C  | -1.97602 | 4.23591  | -2.43628 |
| C  | -2.31923 | 2.82657  | -0.08267 |
| C  | -0.08267 | -2.31923 | 2.82657  |
| C  | -2.82657 | 0.08267  | -2.31923 |
| C  | -2.31923 | -2.82657 | 0.08267  |
| C  | 2.31923  | -2.82657 | -0.08267 |
| C  | -4.23591 | -2.43628 | 1.97602  |
| C  | 1.97602  | -4.23591 | -2.43628 |
| C  | 2.82657  | -0.08267 | -2.31923 |
| C  | 2.43628  | 1.97602  | 4.23591  |
| C  | 2.31923  | 2.82657  | 0.08267  |
| C  | -0.08267 | 2.31923  | -2.82657 |
| C  | 0.08267  | -2.31923 | -2.82657 |
| C  | -4.23591 | 2.43628  | -1.97602 |
| C  | 2.82657  | 0.08267  | 2.31923  |
| C  | -2.43628 | -1.97602 | 4.23591  |

|   |          |          |          |     |   |        |          |     |     |
|---|----------|----------|----------|-----|---|--------|----------|-----|-----|
| C | -2.43628 | 1.97602  | -4.23591 | 95  | t | 342.45 | 33.44026 | YES | YES |
| C | 0.08267  | 2.31923  | 2.82657  | 96  | t | 342.45 | 33.44044 | YES | YES |
| C |          |          |          | 97  | e | 342.72 | 0.00000  | NO  | YES |
| C | 4.23591  | 2.43628  | 1.97602  | 98  | e | 342.72 | 0.00000  | NO  | YES |
| C | 1.97602  | 4.23591  | 2.43628  | 99  | e | 346.36 | 0.00000  | NO  | YES |
| C | 2.43628  | -1.97602 | -4.23591 | 100 | t | 346.43 | 11.83653 | YES | YES |

SCF energy GEOPT = -3833.102315706 H

ZPE = 498.1 kJ/mol

FREEH energy = 710.05 kJ/mol

FREEH entropy = 1.88934 kJ/mol

| Vibrational spectrum |      | wave number | IR intensity | selection rules |       |         |  |  |  |
|----------------------|------|-------------|--------------|-----------------|-------|---------|--|--|--|
| #                    | mode | cm**(-1)    | km/mol       | IR              | RAMAN |         |  |  |  |
| 1                    |      | -0.00       | 0.00000      | -               | -     | 112     |  |  |  |
| 2                    |      | -0.00       | 0.00000      | -               | -     | 113     |  |  |  |
| 3                    |      | -0.00       | 0.00000      | -               | -     | 114     |  |  |  |
| 4                    |      | -0.00       | 0.00000      | -               | -     | 115     |  |  |  |
| 5                    |      | -0.00       | 0.00000      | -               | -     | 116     |  |  |  |
| 6                    |      | 0.00        | 0.00000      | -               | -     | 117     |  |  |  |
| 7                    | e    | 21.70       | 0.00000      | NO              | YES   | 118     |  |  |  |
| 8                    | e    | 21.70       | 0.00000      | NO              | YES   | 119     |  |  |  |
| 9                    | t    | 25.41       | 0.10055      | YES             | YES   | 120     |  |  |  |
| 10                   | t    | 25.41       | 0.10054      | YES             | YES   | 121     |  |  |  |
| 11                   | t    | 25.41       | 0.10053      | YES             | YES   | 122     |  |  |  |
| 12                   | e    | 27.92       | 0.00000      | NO              | YES   | 123     |  |  |  |
| 13                   | t    | 32.35       | 0.01201      | YES             | YES   | 124     |  |  |  |
| 14                   | t    | 32.35       | 0.01201      | YES             | YES   | 125     |  |  |  |
| 15                   | t    | 32.35       | 0.01199      | YES             | YES   | 126     |  |  |  |
| 16                   | t    | 34.53       | 0.04800      | YES             | YES   | 127     |  |  |  |
| 17                   | t    | 34.53       | 0.04801      | YES             | YES   | 128     |  |  |  |
| 18                   | t    | 34.53       | 0.04799      | YES             | YES   | 129     |  |  |  |
| 19                   | e    | 45.90       | 0.00000      | NO              | YES   | 130     |  |  |  |
| 20                   | e    | 45.90       | 0.00000      | NO              | YES   | 131     |  |  |  |
| 21                   | t    | 46.44       | 0.03328      | YES             | YES   | 132     |  |  |  |
| 22                   | t    | 46.44       | 0.03327      | YES             | YES   | 133     |  |  |  |
| 23                   | t    | 46.44       | 0.03328      | YES             | YES   | 134     |  |  |  |
| 24                   | t    | 50.80       | 0.18303      | YES             | YES   | 135     |  |  |  |
| 25                   | t    | 50.80       | 0.18304      | YES             | YES   | 136     |  |  |  |
| 26                   | t    | 50.80       | 0.18304      | YES             | YES   | 137     |  |  |  |
| 27                   | e    | 54.53       | 0.00000      | NO              | YES   | 138     |  |  |  |
| 28                   | e    | 54.53       | 0.00000      | NO              | YES   | 139     |  |  |  |
| 29                   | t    | 57.83       | 0.41431      | YES             | YES   | 140     |  |  |  |
| 30                   | t    | 57.83       | 0.41427      | YES             | YES   | 141     |  |  |  |
| 31                   | t    | 57.83       | 0.41426      | YES             | YES   | 142     |  |  |  |
| 32                   | e    | 66.29       | 0.00000      | NO              | YES   | 143     |  |  |  |
| 33                   | t    | 68.99       | 0.06422      | YES             | YES   | 144     |  |  |  |
| 34                   | t    | 68.99       | 0.06421      | YES             | YES   | 145     |  |  |  |
| 35                   | t    | 68.99       | 0.06421      | YES             | YES   | 146     |  |  |  |
| 36                   | e    | 70.60       | 0.00000      | NO              | YES   | 147     |  |  |  |
| 37                   | e    | 70.60       | 0.00000      | NO              | YES   | 148     |  |  |  |
| 38                   | e    | 72.78       | 0.00000      | NO              | YES   | 149     |  |  |  |
| 39                   | t    | 73.05       | 0.00011      | YES             | YES   | 150     |  |  |  |
| 40                   | t    | 73.05       | 0.00011      | YES             | YES   | 151     |  |  |  |
| 41                   | t    | 73.05       | 0.00011      | YES             | YES   | 152     |  |  |  |
| 42                   | t    | 75.95       | 0.00002      | YES             | YES   | 153     |  |  |  |
| 43                   | t    | 75.95       | 0.00002      | YES             | YES   | 154     |  |  |  |
| 44                   | t    | 75.95       | 0.00002      | YES             | YES   | 155     |  |  |  |
| 45                   | t    | 80.09       | 0.27427      | YES             | YES   | 156     |  |  |  |
| 46                   | t    | 80.09       | 0.27425      | YES             | YES   | 157     |  |  |  |
| 47                   | t    | 80.09       | 0.27431      | YES             | YES   | 158     |  |  |  |
| 48                   | t    | 87.46       | 1.09851      | YES             | YES   | 159     |  |  |  |
| 49                   | t    | 87.46       | 1.09849      | YES             | YES   | 160     |  |  |  |
| 50                   | t    | 87.46       | 1.09847      | YES             | YES   | 161     |  |  |  |
| 51                   | e    | 87.79       | 0.00000      | NO              | YES   | 162     |  |  |  |
| 52                   | e    | 87.79       | 0.00000      | NO              | YES   | 163     |  |  |  |
| 53                   | t    | 92.68       | 0.02452      | YES             | YES   | 164     |  |  |  |
| 54                   | t    | 92.68       | 0.02454      | YES             | YES   | 165     |  |  |  |
| 55                   | t    | 92.68       | 0.02451      | YES             | YES   | 166     |  |  |  |
| 56                   | t    | 96.03       | 0.15542      | YES             | YES   | 167     |  |  |  |
| 57                   | t    | 96.03       | 0.15543      | YES             | YES   | 168     |  |  |  |
| 58                   | t    | 96.03       | 0.15542      | YES             | YES   | 169     |  |  |  |
| 59                   | e    | 96.47       | 0.00000      | NO              | YES   | 170     |  |  |  |
| 60                   | t    | 111.67      | 0.02598      | YES             | YES   | 171     |  |  |  |
| 61                   | t    | 111.67      | 0.02598      | YES             | YES   | 172     |  |  |  |
| 62                   | t    | 111.67      | 0.02598      | YES             | YES   | 173     |  |  |  |
| 63                   | e    | 123.59      | 0.00000      | NO              | YES   | 174     |  |  |  |
| 64                   | e    | 123.59      | 0.00000      | NO              | YES   | 2115.85 |  |  |  |
| 65                   | t    | 125.45      | 1.06214      | YES             | YES   |         |  |  |  |
| 66                   | t    | 125.45      | 1.06235      | YES             | YES   |         |  |  |  |
| 67                   | t    | 125.45      | 1.06234      | YES             | YES   |         |  |  |  |
| 68                   | e    | 126.94      | 0.00000      | NO              | YES   |         |  |  |  |
| 69                   | t    | 129.66      | 0.63934      | YES             | YES   |         |  |  |  |
| 70                   | t    | 129.66      | 0.63912      | YES             | YES   |         |  |  |  |
| 71                   | t    | 129.66      | 0.63915      | YES             | YES   |         |  |  |  |
| 72                   | e    | 140.14      | 0.00000      | NO              | YES   |         |  |  |  |
| 73                   | t    | 141.50      | 0.00320      | YES             | YES   |         |  |  |  |
| 74                   | t    | 141.50      | 0.00320      | YES             | YES   |         |  |  |  |
| 75                   | t    | 141.50      | 0.00320      | YES             | YES   |         |  |  |  |
| 76                   | t    | 155.86      | 0.85683      | YES             | YES   |         |  |  |  |
| 77                   | t    | 155.86      | 0.85682      | YES             | YES   |         |  |  |  |
| 78                   | t    | 155.86      | 0.85682      | YES             | YES   |         |  |  |  |
| 79                   | e    | 324.68      | 0.00000      | NO              | YES   |         |  |  |  |
| 80                   | e    | 324.68      | 0.00000      | NO              | YES   |         |  |  |  |
| 81                   | t    | 324.97      | 0.19928      | YES             | YES   |         |  |  |  |
| 82                   | t    | 324.97      | 0.19891      | YES             | YES   |         |  |  |  |
| 83                   | t    | 324.97      | 0.19925      | YES             | YES   |         |  |  |  |
| 84                   | t    | 326.47      | 9.26305      | YES             | YES   |         |  |  |  |
| 85                   | t    | 326.47      | 9.26324      | YES             | YES   |         |  |  |  |
| 86                   | t    | 326.47      | 9.26301      | YES             | YES   |         |  |  |  |
| 87                   | t    | 335.98      | 11.97834     | YES             | YES   |         |  |  |  |
| 88                   | t    | 335.98      | 11.97613     | YES             | YES   |         |  |  |  |
| 89                   | t    | 335.98      | 11.97807     | YES             | YES   |         |  |  |  |
| 90                   | e    | 337.01      | 0.00000      | NO              | YES   |         |  |  |  |
| 91                   | t    | 340.71      | 0.12353      | YES             | YES   |         |  |  |  |
| 92                   | t    | 340.71      | 0.12349      | YES             | YES   |         |  |  |  |
| 93                   | t    | 340.71      | 0.12354      | YES             | YES   |         |  |  |  |
| 94                   | t    | 342.45      | 33.44259     | YES             | YES   |         |  |  |  |

### Structural Discussions of Compounds 1 – 4

**Table S13.** Experimental bond lengths  $d$  [Å] and angles [°] of the metallic core of all discussed compounds. Mean values are given for **3a**, **4a** and **4b**.

|          |          |                                                                  | $d_{\text{Ag-Ag}}$ [Å] | $d_{\text{Ag-M1}}$ [Å] | $d_{\text{Ag-M2}}$ [Å] | M-Ag-M [°]  |
|----------|----------|------------------------------------------------------------------|------------------------|------------------------|------------------------|-------------|
| <b>1</b> | <b>a</b> | Ag{M(CO) <sub>6</sub> } <sub>2</sub> <sup>-</sup>                | -                      | 2.8359(5)              | 2.8467(5)              | 174.027(14) |
|          | <b>b</b> |                                                                  | -                      | -                      | -                      | -           |
| <b>2</b> | <b>a</b> | Ag <sub>2</sub> {M(CO) <sub>6</sub> } <sub>3</sub> <sup>-</sup>  | 2.8891(11)             | 2.8081(8)              | 2.8672(8)              | 167.49(3)   |
|          | <b>b</b> |                                                                  | 2.8818(12)             | 2.8166(6)              | 2.8710(7)              | 167.40(3)   |
| <b>3</b> | <b>a</b> | Ag <sub>6</sub> {M(CO) <sub>6</sub> } <sub>5</sub> <sup>+</sup>  | 2.851                  |                        | 2.957                  | 150.84      |
| <b>4</b> | <b>a</b> | Ag <sub>6</sub> {M(CO) <sub>6</sub> } <sub>4</sub> <sup>2+</sup> | 2.9011                 |                        | 2.9858                 | 177.27      |
|          | <b>b</b> |                                                                  | 2.8995                 |                        | 2.9835                 | 177.30      |

**Table S14.** Experimental bond lengths  $d$  [Å] of **1a<sup>-</sup>**, **2a<sup>-</sup>**, **2b<sup>-</sup>**, **3a<sup>+</sup>**, **4a<sup>2+</sup>** and **4b<sup>2+</sup>** sorted due to the hapticity.

|                      |         | <b>1a<sup>-</sup></b> | <b>2a<sup>-</sup></b> | <b>2b<sup>-</sup></b> | <b>3a<sup>+</sup></b> | <b>4a<sup>2+</sup></b> | <b>4b<sup>2+</sup></b> |
|----------------------|---------|-----------------------|-----------------------|-----------------------|-----------------------|------------------------|------------------------|
| $d_{\text{Ag-M}}$    | $\mu_1$ | 2.836 – 2.847         | 2.808                 | 2.817                 | -                     | -                      | -                      |
|                      | $\mu_2$ | -                     | 2.867                 | 2.871                 | 2.891 – 2.952         | -                      | -                      |
|                      | $\mu_3$ | -                     | -                     | -                     | 2.941 – 3.067         | 2.966 – 3.015          | 2.966 – 3.016          |
| $d_{\text{Ag-C}}$    | $\mu_1$ | 2.544 – 2.669         | 2.505 – 2.629         | 2.524 – 2.597         | -                     | -                      | -                      |
|                      | $\mu_2$ | -                     | 2.551                 | 2.568                 | 2.57 – 2.70           | -                      | -                      |
|                      | $\mu_3$ | -                     | -                     | -                     | 2.57 – 2.69           | 2.592 – 2.701          | 2.582 – 2.706          |
| $d_{\text{M-C}}$     | $\mu_1$ | 2.111 – 2.150         | 2.107 – 2.149         | 2.091 – 2.128         | -                     | -                      | -                      |
|                      | $\mu_2$ | -                     | 2.124 – 2.164         | 2.110 – 2.141         | 2.07 – 2.21           | -                      | -                      |
|                      | $\mu_3$ | -                     | -                     | -                     | 2.07 – 2.23           | 2.110 – 2.219          | 2.102 – 2.173          |
| $d_{\text{CAg-O}}$   | $\mu_1$ | 1.146 – 1.157         | 1.157 – 1.160         | 1.139 – 1.157         | -                     | -                      | -                      |
|                      | $\mu_2$ | -                     | 1.152                 | 1.152                 | 1.15 – 1.20           | -                      | -                      |
|                      | $\mu_3$ | -                     | -                     | -                     | 1.13 – 1.21           | 1.096 – 1.150          | 1.119 – 1.161          |
| $d_{\text{Cfree-O}}$ | $\mu_1$ | 1.137 – 1.140         | 1.133 – 1.164         | 1.124 – 1.150         | -                     | -                      | -                      |
|                      | $\mu_2$ | -                     | 1.126 – 1.149         | 1.131 – 1.151         | 1.10 – 1.24           | -                      | -                      |
|                      | $\mu_3$ | -                     | -                     | -                     | 1.10 – 1.17           | 1.098 – 1.166          | 1.113 – 1.153          |

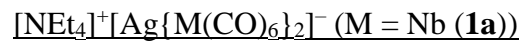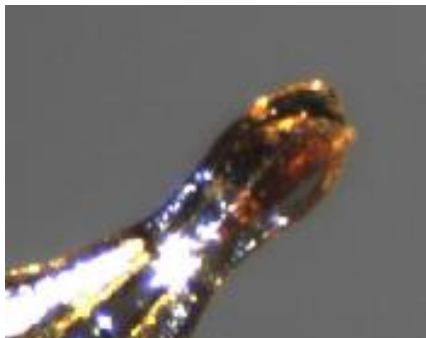

**Fig. S8.** Crystal of **1a** mounted on a 0.03 mm micromount.

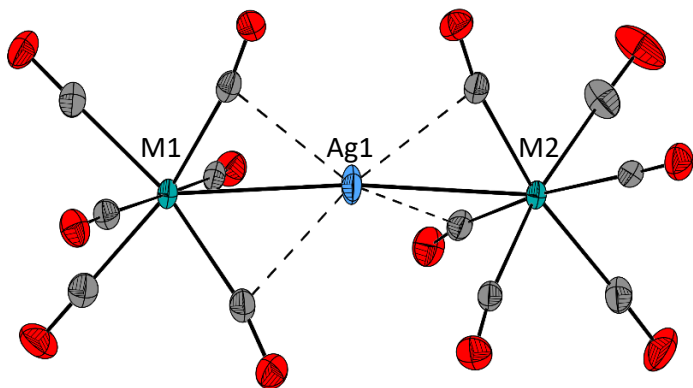

**Fig. S9.** Atom labels of **1a**<sup>-</sup> (M = Nb) for the assignment of bond lengths and angles.

**Table S15.** Range and mean values of bond length [ $\text{\AA}$ ] of **1a<sup>-</sup>** (M = Nb) and **1b<sup>-</sup>** (M = Ta).

|                           | <b>1a<sup>-</sup> exp.</b> |            | <b>calc. (C<sub>2</sub>)<sup>[a]</sup></b> |            | <b>1b<sup>-</sup> calc. (D<sub>3d</sub>)<sup>[a]</sup></b> |            |
|---------------------------|----------------------------|------------|--------------------------------------------|------------|------------------------------------------------------------|------------|
|                           | <b>range</b>               | <b>av.</b> | <b>range</b>                               | <b>av.</b> | <b>range</b>                                               | <b>av.</b> |
| <b>Ag-M</b>               | 2.836 – 2.847              | 2.842      | 2.831                                      |            | 2.818                                                      |            |
| <b>Ag-C</b>               | 2.544 – 2.669              | 2.608      | 2.441 – 2.478                              | 2.460      | 2.639                                                      |            |
| <b>C-O</b>                | 1.137 – 1.157              | 1.145      | 1.159 – 1.167                              | 1.162      | 1.161 – 1.165                                              | 1.163      |
| <b>C<sub>Ag</sub>-O</b>   | 1.146 – 1.157              | 1.152      | 1.166 – 1.167                              | 1.167      | 1.161                                                      |            |
| <b>C<sub>free</sub>-O</b> | 1.137 – 1.140              | 1.139      | 1.159 – 1.161                              | 1.160      | 1.165                                                      |            |
| <b>M-C</b>                | 2.111 – 2.150              | 2.135      | 2.123 – 2.140                              | 2.130      | 2.128 – 2.142                                              | 2.135      |
| <b>M-C<sub>Ag</sub></b>   | 2.111 – 2.138              | 2.145      | 2.139 – 2.140                              | 2.140      | 2.128                                                      |            |
| <b>M-C<sub>free</sub></b> | 2.137 – 2.150              | 2.143      | 2.123 – 2.130                              | 2.125      | 2.142                                                      |            |

<sup>[a]</sup> (RI-)BP86-D3(BJ)/def2-TZVPP

$[\text{NEt}_4]^+[\text{Ag}_2\{\text{M}(\text{CO})_6\}_3]^-$  (M = Nb (**2a**), Ta (**2b**))

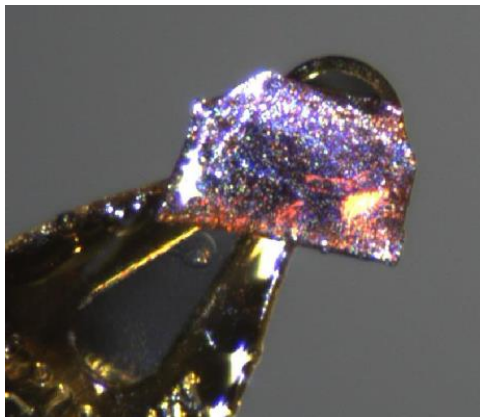

Fig. S10. Crystal of **2a** mounted on a 0.2 mm micromount.

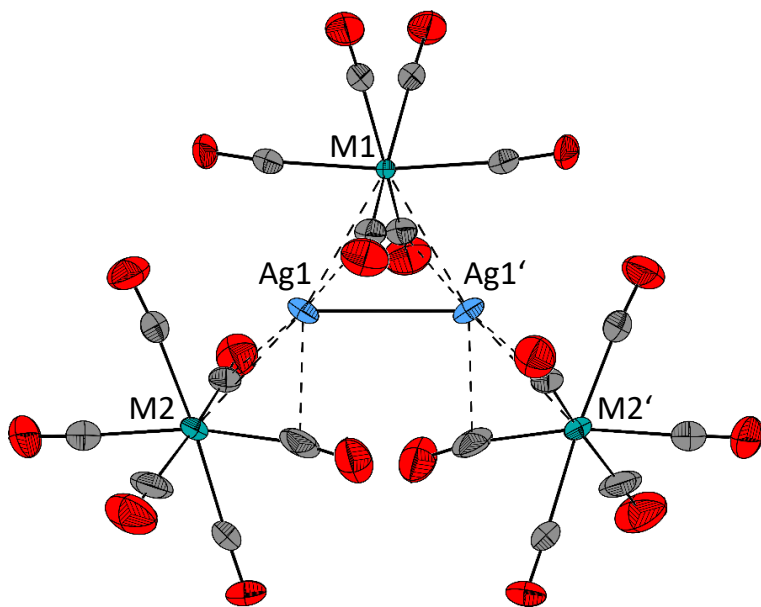

Fig. S11. Atom labels of **2a**<sup>-</sup> (M = Nb) or **2b**<sup>-</sup> (M = Ta) for the assignment of bond lengths and angles.



**Table S16.** Range and mean values of bond length [ $\text{\AA}$ ] of **2a<sup>-</sup>** (M = Nb) and **2b<sup>-</sup>** (M = Ta).

|                           | <b>2a<sup>-</sup></b> |       | calc. (C <sub>2</sub> ) <sup>[a]</sup> |       | <b>2b<sup>-</sup></b> |       | calc. (C <sub>2</sub> ) <sup>[a]</sup> |       |
|---------------------------|-----------------------|-------|----------------------------------------|-------|-----------------------|-------|----------------------------------------|-------|
|                           | range                 | av.   | range                                  | av.   | range                 | av.   | range                                  | av.   |
| <b>Ag-Ag</b>              | 2.889                 |       | 2.791                                  |       | 2.882                 |       | 2.784                                  |       |
| <b>Ag-M</b>               | 2.808 – 2.867         | 2.838 | 2.777 – 2.890                          | 2.834 | 2.816 – 2.871         | 2.844 | 2.790 – 2.901                          | 2.846 |
| <b>Ag-C</b>               | 2.505 – 2.629         | 2.562 | 2.327 – 2.640                          | 2.528 | 2.524 – 2.597         | 2.563 | 2.348 – 2.645                          | 2.544 |
| <b>C-O</b>                | 1.126 – 1.164         | 1.149 | 1.156 – 1.165                          | 1.160 | 1.124 – 1.157         | 1.143 | 1.157 – 1.166                          | 1.161 |
| <b>C<sub>Ag</sub>-O</b>   | 1.152 – 1.164         | 1.158 | 1.157 – 1.165                          | 1.162 | 1.134 – 1.157         | 1.146 | 1.158 – 1.166                          | 1.164 |
| <b>C<sub>free</sub>-O</b> | 1.126 – 1.150         | 1.141 | 1.156 – 1.159                          | 1.157 | 1.124 – 1.151         | 1.139 | 1.157 – 1.160                          | 1.158 |
| <b>M-C</b>                | 2.107 – 2.164         | 2.129 | 2.114 – 2.158                          | 2.134 | 2.105 – 2.141         | 2.116 | 2.119 – 2.159                          | 2.137 |
| <b>M-C<sub>Ag</sub></b>   | 2.107 – 2.124         | 2.116 | 2.135 – 2.158                          | 2.142 | 2.105 – 2.114         | 2.105 | 2.138 – 2.159                          | 2.144 |
| <b>M-C<sub>free</sub></b> | 2.119 – 2.164         | 2.140 | 2.114 – 2.138                          | 2.126 | 2.110 – 2.141         | 2.120 | 2.119 – 2.141                          | 2.130 |

<sup>[a]</sup> (RI-)BP86-D3(BJ)/def2-TZVPP

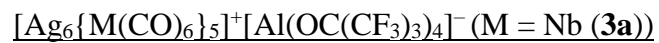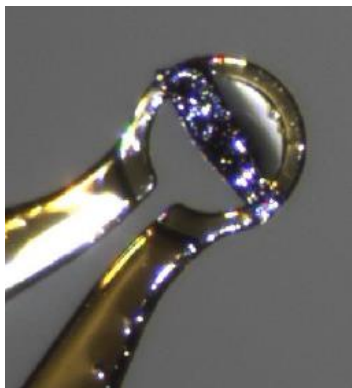

**Fig. S12.** Crystal of **3a** mounted on a 0.1 mm micromount.

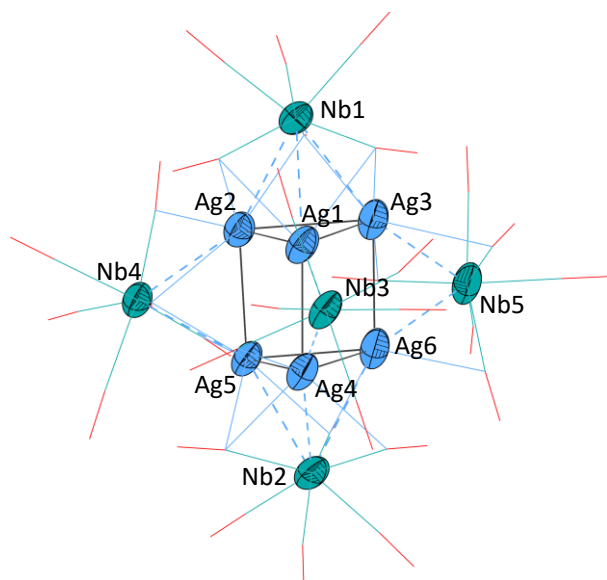

**Fig. S13.** Atom labels of **3a**<sup>+</sup> for the assignment of bond lengths and angles.

Due to the poor crystallographic data the given average bond lengths are not reliable, but can be seen as rough guide.

**Table S17.** Range and mean values of bond length [ $\text{\AA}$ ] of  $3\mathbf{a}^+$  ( $M = \text{Nb}$ ).

|                           | $3\mathbf{a}^+$ |       | calc. ( $D_{3h}$ ) <sup>[a]</sup> |       |
|---------------------------|-----------------|-------|-----------------------------------|-------|
|                           | range           | av.   | range                             | av.   |
| <b>Ag-Ag</b>              | 2.776 – 2.948   | 2.851 | 2.830 – 2.842                     | 2.838 |
| <b>Ag-M</b>               | 2.891 – 3.067   | 2.957 | 2.873 – 2.964                     | 2.919 |
| <b>Ag-C</b>               | 2.57 – 2.70     | 2.62  | 2.497 – 2.549                     | 2.521 |
| <b>C-O</b>                | 1.10 – 1.24     | 1.16  | 1.144 – 1.164                     | 1.153 |
| <b>C<sub>Ag</sub>-O</b>   | 1.13 – 1.21     | 1.16  | 1.145 – 1.164                     | 1.160 |
| <b>C<sub>free</sub>-O</b> | 1.10 – 1.24     | 1.15  | 1.144 – 1.149                     | 1.146 |
| <b>M-C</b>                | 2.02 – 2.23     | 2.13  | 2.118 – 2.160                     | 2.146 |
| <b>M-C<sub>Ag</sub></b>   | 2.02 – 2.19     | 2.11  | 2.150 – 2.160                     | 2.153 |
| <b>M-C<sub>free</sub></b> | 2.07 – 2.23     | 2.15  | 2.118 – 2.149                     | 2.139 |

<sup>[a]</sup> (RI-)BP86-D3(BJ)/def2-TZVPP

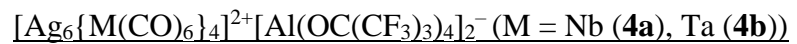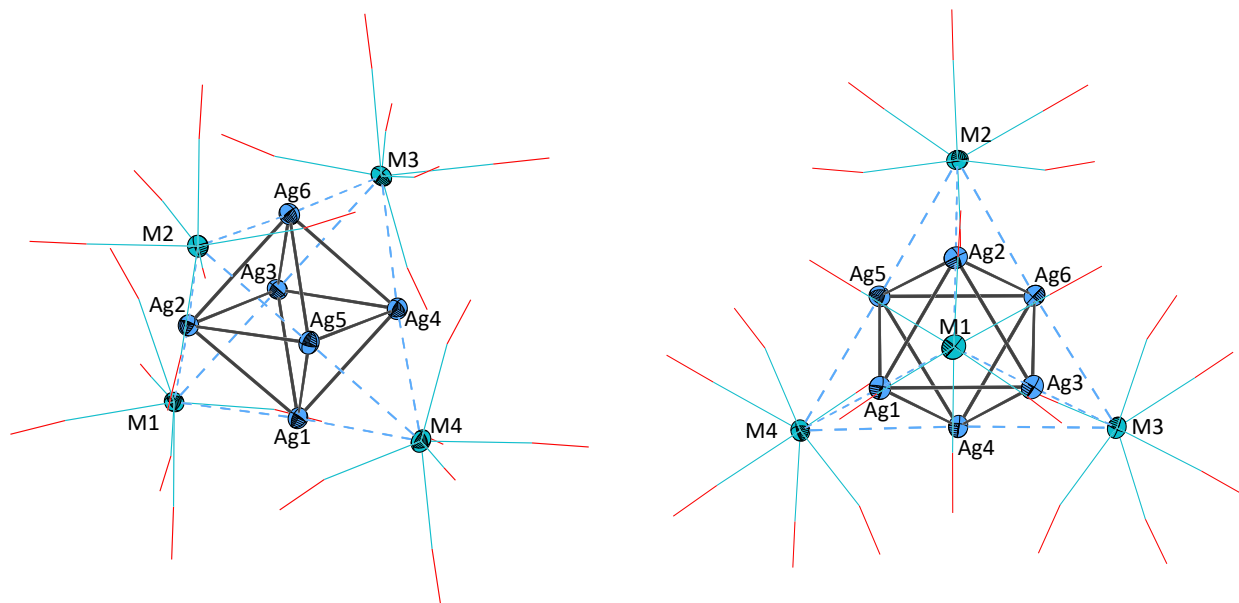

**Fig. S14.** Atom labels of **4a**<sup>2+</sup> or **4b**<sup>2+</sup> (left: side view, right: front view) for the assignment of bond lengths and angles.

**Table S18.** Range and mean values of bond length [ $\text{\AA}$ ] of  $4\mathbf{a}^{2+}$  (M = Nb) and  $4\mathbf{b}^{2+}$  (M = Ta).

|                           | $4\mathbf{a}^{2+}$ |       | calc. (T) <sup>[a]</sup> |       | $4\mathbf{b}^{2+}$ |       | calc. (T) <sup>[a]</sup> |       |
|---------------------------|--------------------|-------|--------------------------|-------|--------------------|-------|--------------------------|-------|
|                           | range              | av.   | range                    | av    | range              | av.   | range                    | av.   |
| <b>Ag-Ag</b>              | 2.855 – 2.925      | 2.901 |                          | 2.907 | 2.859 – 2.926      | 2.900 |                          | 2.904 |
| <b>Ag-M</b>               | 2.966 – 3.015      | 2.986 |                          | 2.954 | 2.966 – 3.016      | 2.984 |                          | 2.967 |
| <b>Ag-C</b>               | 2.592 – 2.701      | 2.634 |                          | 2.429 | 2.582 – 2.706      | 2.635 |                          | 2.446 |
| <b>C-O</b>                | 1.096 – 1.166      | 1.128 | 1.141 – 1.160            | 1.151 | 1.113 – 1.161      | 1.135 | 1.141 – 1.161            | 1.151 |
| <b>C<sub>Ag</sub>-O</b>   | 1.096 – 1.150      | 1.132 |                          | 1.160 | 1.119 – 1.161      | 1.147 |                          | 1.161 |
| <b>C<sub>free</sub>-O</b> | 1.098 – 1.166      | 1.124 |                          | 1.141 | 1.113 – 1.153      | 1.123 |                          | 1.141 |
| <b>M-C</b>                | 2.110 – 2.219      | 2.168 | 2.151 – 2.167            | 2.159 | 2.102 – 2.173      | 2.142 | 2.154 – 2.168            | 2.161 |
| <b>M-C<sub>Ag</sub></b>   | 2.133 – 2.207      | 2.158 |                          | 2.151 | 2.102 – 2.173      | 2.123 |                          | 2.154 |
| <b>M-C<sub>free</sub></b> | 2.110 – 2.219      | 2.179 |                          | 2.167 | 2.119 – 1.170      | 2.162 |                          | 2.168 |

<sup>[a]</sup> (RI-)BP86-D3(BJ)/def2-TZVPP

## Single-Crystal Diffraction Results for Compounds 1 – 4

Table S19. Crystallographic data for complexes 1 – 4.

|                                                              | 1a                                                                           | 2a                                                                               | 2b                                                                               | 3a                                                                                               | 4a                                                                                                             | 4b                                                                                                             |
|--------------------------------------------------------------|------------------------------------------------------------------------------|----------------------------------------------------------------------------------|----------------------------------------------------------------------------------|--------------------------------------------------------------------------------------------------|----------------------------------------------------------------------------------------------------------------|----------------------------------------------------------------------------------------------------------------|
| CCDC                                                         | 1998854                                                                      | 1998851                                                                          | 1998852                                                                          | 1998853                                                                                          | 1909279                                                                                                        | 1998922                                                                                                        |
| Empirical formula                                            | C <sub>20</sub> H <sub>20</sub> AgNNb <sub>2</sub> O <sub>12</sub>           | C <sub>26</sub> H <sub>20</sub> Ag <sub>2</sub> NNb <sub>3</sub> O <sub>18</sub> | C <sub>26</sub> H <sub>20</sub> Ag <sub>2</sub> NO <sub>18</sub> Ta <sub>3</sub> | C <sub>61</sub> H <sub>5</sub> Ag <sub>6</sub> AlF <sub>46</sub> Nb <sub>5</sub> O <sub>34</sub> | C <sub>80</sub> H <sub>8</sub> Ag <sub>6</sub> Al <sub>2</sub> F <sub>88</sub> Nb <sub>4</sub> O <sub>32</sub> | C <sub>80</sub> H <sub>8</sub> Ag <sub>6</sub> Al <sub>2</sub> F <sub>88</sub> O <sub>32</sub> Ta <sub>4</sub> |
| Formula weight                                               | 760.06                                                                       | 1128.90                                                                          | 1393.02                                                                          | 3294.40                                                                                          | 4225.68                                                                                                        | 4577.85                                                                                                        |
| Temperature/K                                                | 100(2)                                                                       | 100(2)                                                                           | 200(2)                                                                           | 100(2)                                                                                           | 100(2)                                                                                                         | 100(2)                                                                                                         |
| Crystal system                                               | monoclinic                                                                   | monoclinic                                                                       | monoclinic                                                                       | triclinic                                                                                        | orthorhombic                                                                                                   | orthorhombic                                                                                                   |
| Space group                                                  | <i>P</i> 2 <sub>1</sub> / <i>c</i>                                           | <i>C</i> 2/ <i>c</i>                                                             | <i>C</i> 2/ <i>c</i>                                                             | <i>P</i> $\bar{1}$                                                                               | <i>Pbca</i>                                                                                                    | <i>Pbca</i>                                                                                                    |
| <i>a</i> /Å                                                  | 18.187(3)                                                                    | 19.244(3)                                                                        | 19.412(5)                                                                        | 17.242(6)                                                                                        | 30.4820(12)                                                                                                    | 30.459(12)                                                                                                     |
| <i>b</i> /Å                                                  | 10.524(2)                                                                    | 10.5949(16)                                                                      | 10.642(2)                                                                        | 18.251(4)                                                                                        | 21.4374(8)                                                                                                     | 21.418(12)                                                                                                     |
| <i>c</i> /Å                                                  | 14.594(3)                                                                    | 18.888(2)                                                                        | 18.956(3)                                                                        | 18.301(4)                                                                                        | 36.6092(14)                                                                                                    | 36.508(17)                                                                                                     |
| $\alpha$ /°                                                  | 90                                                                           | 90                                                                               | 90                                                                               | 77.593(10)                                                                                       | 90                                                                                                             | 90                                                                                                             |
| $\beta$ /°                                                   | 107.735(6)                                                                   | 105.273(3)                                                                       | 105.126(12)                                                                      | 63.291(16)                                                                                       | 90                                                                                                             | 90                                                                                                             |
| $\gamma$ /°                                                  | 90                                                                           | 90                                                                               | 90                                                                               | 62.504(10)                                                                                       | 90                                                                                                             | 90                                                                                                             |
| Volume/Å <sup>3</sup>                                        | 2660.5(9)                                                                    | 3715.0(9)                                                                        | 3780.1(14)                                                                       | 4563(2)                                                                                          | 23922.5(16)                                                                                                    | 23817(19)                                                                                                      |
| <i>Z</i>                                                     | 4                                                                            | 4                                                                                | 4                                                                                | 2                                                                                                | 8                                                                                                              | 8                                                                                                              |
| $\rho_{\text{calc}}/\text{cm}^3$                             | 1.898                                                                        | 2.018                                                                            | 2.448                                                                            | 2.398                                                                                            | 2.347                                                                                                          | 2.553                                                                                                          |
| $\mu/\text{mm}^{-1}$                                         | 1.635                                                                        | 2.005                                                                            | 9.739                                                                            | 16.727                                                                                           | 1.553                                                                                                          | 4.848                                                                                                          |
| <i>F</i> (000)                                               | 1488                                                                         | 2176                                                                             | 2560                                                                             | 3114                                                                                             | 16064.0                                                                                                        | 17088                                                                                                          |
| Crystal size/mm <sup>3</sup>                                 | 0.150×0.100×0.050                                                            | 0.100×0.100×0.030                                                                | 0.200×0.200×0.050                                                                | 0.08×0.07×0.02                                                                                   | 0.080 × 0.020 × 0.020                                                                                          | 0.300×0.100×0.060                                                                                              |
| Radiation                                                    | MoK $\alpha$ ( $\lambda$ =0.71073)                                           | MoK $\alpha$ ( $\lambda$ =0.71073)                                               | MoK $\alpha$ ( $\lambda$ =0.71073)                                               | CuK $\alpha$ ( $\lambda$ =1.54178)                                                               | MoK $\alpha$ ( $\lambda$ = 0.71073)                                                                            | MoK $\alpha$ ( $\lambda$ =0.71073)                                                                             |
| 2 $\theta$ range for data collection/°                       | 4.53 to 56.76                                                                | 4.39 to 50.26                                                                    | 4.35 to 56.78                                                                    | 5.41 to 109.91                                                                                   | 2.224 to 50.14                                                                                                 | 2.23 to 52.86                                                                                                  |
| Index ranges                                                 | -24 ≤ <i>h</i> ≤ 24, -14 ≤ <i>k</i> ≤ 14, -19 ≤ <i>l</i> ≤ 19                | -17 ≤ <i>h</i> ≤ 22, -12 ≤ <i>k</i> ≤ 12, -22 ≤ <i>l</i> ≤ 21                    | -25 ≤ <i>h</i> ≤ 25, -14 ≤ <i>k</i> ≤ 14, -25 ≤ <i>l</i> ≤ 24                    | -17 ≤ <i>h</i> ≤ 17, -18 ≤ <i>k</i> ≤ 19, -19 ≤ <i>l</i> ≤ 19                                    | -36 ≤ <i>h</i> ≤ 36, -25 ≤ <i>k</i> ≤ 25, -43 ≤ <i>l</i> ≤ 43                                                  | -38 ≤ <i>h</i> ≤ 38, -26 ≤ <i>k</i> ≤ 26, -45 ≤ <i>l</i> ≤ 45                                                  |
| Reflections collected                                        | 58916                                                                        | 16972                                                                            | 39095                                                                            | 58871                                                                                            | 743919                                                                                                         | 542712                                                                                                         |
| Independent reflections                                      | 6605 [ <i>R</i> <sub>int</sub> = 0.0411, <i>R</i> <sub>sigma</sub> = 0.0230] | 3314 [ <i>R</i> <sub>int</sub> = 0.0960, <i>R</i> <sub>sigma</sub> = 0.0853]     | 4713 [ <i>R</i> <sub>int</sub> = 0.0362, <i>R</i> <sub>sigma</sub> = 0.0244]     | 11089 [ <i>R</i> <sub>int</sub> = 0.1317, <i>R</i> <sub>sigma</sub> = 0.1087]                    | 21232 [ <i>R</i> <sub>int</sub> = 0.0966, <i>R</i> <sub>sigma</sub> = 0.0312]                                  | 24489 [ <i>R</i> <sub>int</sub> = 0.0879, <i>R</i> <sub>sigma</sub> = 0.0307]                                  |
| Data/restraints/parameters                                   | 6605/0/329                                                                   | 3314/144/274                                                                     | 4713/129/271                                                                     | 11089/7758/1677                                                                                  | 21232/50458/3324                                                                                               | 24489/43315/3072                                                                                               |
| Goodness-of-fit on <i>F</i> <sup>2</sup>                     | 1.075                                                                        | 1.069                                                                            | 1.156                                                                            | 1.043                                                                                            | 1.264                                                                                                          | 1.215                                                                                                          |
| Final <i>R</i> indexes [ <i>I</i> ≥ 2 $\sigma$ ( <i>I</i> )] | <i>R</i> <sub>1</sub> = 0.0344, <i>wR</i> <sub>2</sub> = 0.0958              | <i>R</i> <sub>1</sub> = 0.0475, <i>wR</i> <sub>2</sub> = 0.0833                  | <i>R</i> <sub>1</sub> = 0.0352, <i>wR</i> <sub>2</sub> = 0.1181                  | <i>R</i> <sub>1</sub> = 0.0945, <i>wR</i> <sub>2</sub> = 0.2487                                  | <i>R</i> <sub>1</sub> = 0.0702, <i>wR</i> <sub>2</sub> = 0.1514                                                | <i>R</i> <sub>1</sub> = 0.0485, <i>wR</i> <sub>2</sub> = 0.0917                                                |
| Final <i>R</i> indexes [all data]                            | <i>R</i> <sub>1</sub> = 0.0407, <i>wR</i> <sub>2</sub> = 0.1016              | <i>R</i> <sub>1</sub> = 0.0906, <i>wR</i> <sub>2</sub> = 0.0939                  | <i>R</i> <sub>1</sub> = 0.0372, <i>wR</i> <sub>2</sub> = 0.1203                  | <i>R</i> <sub>1</sub> = 0.1421, <i>wR</i> <sub>2</sub> = 0.2899                                  | <i>R</i> <sub>1</sub> = 0.0804, <i>wR</i> <sub>2</sub> = 0.1559                                                | <i>R</i> <sub>1</sub> = 0.0636, <i>wR</i> <sub>2</sub> = 0.0978                                                |
| Largest diff. peak/hole / e Å <sup>-3</sup>                  | 1.50/-1.20                                                                   | 0.73/-1.03                                                                       | 1.60/-1.87                                                                       | 2.21/-1.44                                                                                       | 1.46/-1.08                                                                                                     | 1.70/-1.25                                                                                                     |

## Full Details to the Single-Crystal Structure Determinations

### Structure of **1a**

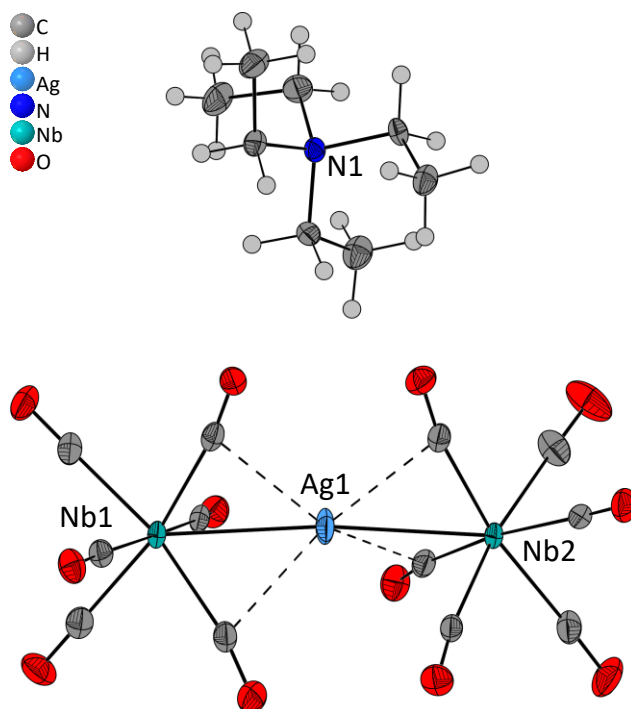

**Fig. S15.** Molecular structure of **1a**. Thermal ellipsoids are shown at the 50 % probability level.

### Structure Tables

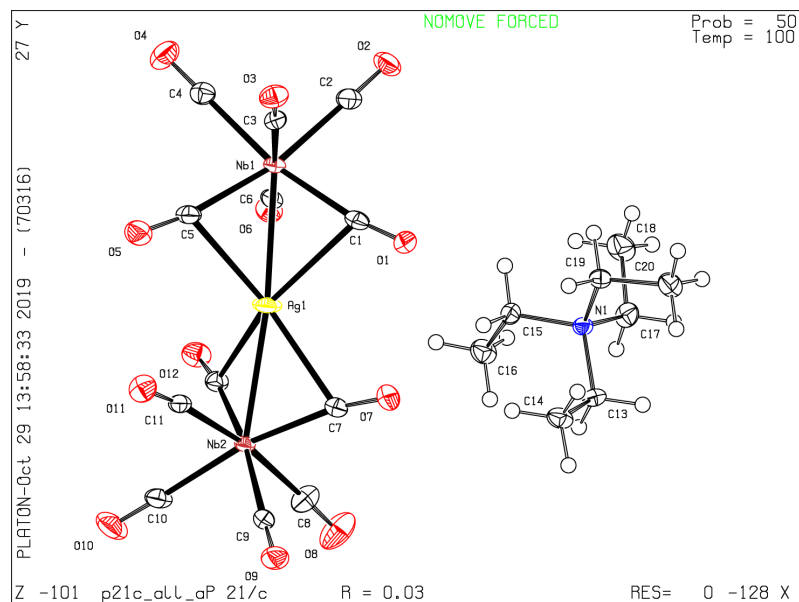

Table 1. Crystal data and structure refinement for p21c\_all\_a-finalcif.cif

|                                                                   |                                                                                             |
|-------------------------------------------------------------------|---------------------------------------------------------------------------------------------|
| CCDC number                                                       | 1998854                                                                                     |
| Empirical formula                                                 | C <sub>20</sub> H <sub>20</sub> AgNNb <sub>2</sub> O <sub>12</sub>                          |
| Formula weight                                                    | 760.06                                                                                      |
| Temperature [K]                                                   | 100(2)                                                                                      |
| Crystal system                                                    | monoclinic                                                                                  |
| Space group (number)                                              | <i>P</i> 2 <sub>1</sub> / <i>c</i> (14)                                                     |
| <i>a</i> [Å]                                                      | 18.187(3)                                                                                   |
| <i>b</i> [Å]                                                      | 10.524(2)                                                                                   |
| <i>c</i> [Å]                                                      | 14.594(3)                                                                                   |
| $\alpha$ [Å]                                                      | 90                                                                                          |
| $\beta$ [Å]                                                       | 107.735(6)                                                                                  |
| $\gamma$ [Å]                                                      | 90                                                                                          |
| Volume [Å <sup>3</sup> ]                                          | 2660.5(9)                                                                                   |
| <i>Z</i>                                                          | 4                                                                                           |
| $\rho_{\text{calc}}$ [g/cm <sup>3</sup> ]                         | 1.898                                                                                       |
| $\mu$ [mm <sup>-1</sup> ]                                         | 1.635                                                                                       |
| <i>F</i> (000)                                                    | 1488                                                                                        |
| Crystal size [mm <sup>3</sup> ]                                   | 0.150×0.100×0.050                                                                           |
| Crystal colour                                                    | red                                                                                         |
| Crystal shape                                                     | needle                                                                                      |
| Radiation                                                         | MoK $\alpha$ ( $\lambda$ =0.71073)                                                          |
| 2 $\theta$ range [°]                                              | 4.53 to 56.76                                                                               |
| Index ranges                                                      | -24 $\leq$ <i>h</i> $\leq$ 24, -14 $\leq$ <i>k</i> $\leq$ 14, -19 $\leq$ <i>l</i> $\leq$ 19 |
| Reflections collected                                             | 58916                                                                                       |
| Independent reflections                                           | 6605, <i>R</i> <sub>int</sub> = 0.0411<br><i>R</i> <sub>sigma</sub> = 0.0230                |
| Completeness to $\theta$ = 25.242°                                | 100.00                                                                                      |
| Data / Restraints / Parameters                                    | 6605/0/329                                                                                  |
| Goodness-of-fit on <i>F</i> <sup>2</sup>                          | 1.075                                                                                       |
| Final <i>R</i> indexes [ <i>I</i> $\geq$ 2 $\sigma$ ( <i>I</i> )] | <i>R</i> <sub>1</sub> = 0.0344, <i>wR</i> <sub>2</sub> = 0.0958                             |
| Final <i>R</i> indexes [all data]                                 | <i>R</i> <sub>1</sub> = 0.0407, <i>wR</i> <sub>2</sub> = 0.1016                             |
| Largest peak/hole [eÅ <sup>-3</sup> ]                             | 1.50/-1.20                                                                                  |

|           |          |
|-----------|----------|
| Nb2 - C7  | 2.111(3) |
| Nb2 - C11 | 2.133(3) |
| Nb2 - C8  | 2.136(3) |
| Nb2 - C12 | 2.138(3) |
| Nb2 - C9  | 2.141(3) |
| Nb2 - C10 | 2.150(3) |
| O2 - C2   | 1.138(4) |
| O4 - C4   | 1.140(4) |
| C3 - O3   | 1.139(4) |
| C5 - O5   | 1.153(4) |
| O6 - C6   | 1.147(4) |
| O7 - C7   | 1.157(4) |
| O8 - C8   | 1.139(4) |
| C9 - O9   | 1.137(4) |
| C10 - O10 | 1.139(4) |
| C11 - O11 | 1.146(4) |
| C12 - O12 | 1.152(4) |
| C13 - C14 | 1.516(4) |
| C15 - C16 | 1.520(4) |
| C17 - C18 | 1.508(5) |
| C19 - C20 | 1.514(4) |

| Atom - Atom - Atom | Angle [°]   |
|--------------------|-------------|
| C7 - Ag1 - C5      | 145.42(10)  |
| C7 - Ag1 - C12     | 82.88(10)   |
| C5 - Ag1 - C12     | 116.42(10)  |
| C7 - Ag1 - C1      | 94.35(10)   |
| C5 - Ag1 - C1      | 80.20(10)   |
| C12 - Ag1 - C1     | 153.47(10)  |
| C7 - Ag1 - Nb1     | 139.58(7)   |
| C5 - Ag1 - Nb1     | 45.93(7)    |
| C12 - Ag1 - Nb1    | 131.99(7)   |
| C1 - Ag1 - Nb1     | 45.22(7)    |
| C7 - Ag1 - Nb2     | 45.69(7)    |
| C5 - Ag1 - Nb2     | 128.47(7)   |
| C12 - Ag1 - Nb2    | 45.89(7)    |
| C1 - Ag1 - Nb2     | 139.86(7)   |
| Nb1 - Ag1 - Nb2    | 174.027(14) |
| O1 - C1 - Nb1      | 170.8(3)    |
| O1 - C1 - Ag1      | 117.5(2)    |
| Nb1 - C1 - Ag1     | 71.56(9)    |
| C1 - Nb1 - C6      | 99.79(12)   |
| C1 - Nb1 - C5      | 105.97(12)  |
| C6 - Nb1 - C5      | 99.12(12)   |
| C1 - Nb1 - C4      | 169.03(12)  |
| C6 - Nb1 - C4      | 85.59(12)   |
| C5 - Nb1 - C4      | 82.39(12)   |
| C1 - Nb1 - C3      | 85.09(11)   |
| C6 - Nb1 - C3      | 173.47(12)  |
| C5 - Nb1 - C3      | 83.58(12)   |
| C4 - Nb1 - C3      | 88.89(12)   |
| C1 - Nb1 - C2      | 84.20(12)   |
| C6 - Nb1 - C2      | 82.96(12)   |
| C5 - Nb1 - C2      | 168.99(12)  |
| C4 - Nb1 - C2      | 87.01(12)   |
| C3 - Nb1 - C2      | 93.27(12)   |
| C1 - Nb1 - Ag1     | 63.22(8)    |
| C6 - Nb1 - Ag1     | 66.40(8)    |
| C5 - Nb1 - Ag1     | 61.36(8)    |
| C4 - Nb1 - Ag1     | 127.72(9)   |

Table 2. Bond lengths and angles for p21c\_all\_a-finalcif.cif.

| Atom - Atom | Length [Å] |
|-------------|------------|
| Ag1 - C7    | 2.544(3)   |
| Ag1 - C5    | 2.607(3)   |
| Ag1 - C12   | 2.611(3)   |
| Ag1 - C1    | 2.669(3)   |
| Ag1 - Nb1   | 2.8359(5)  |
| Ag1 - Nb2   | 2.8467(5)  |
| O1 - C1     | 1.155(4)   |
| C1 - Nb1    | 2.122(3)   |
| Nb1 - C6    | 2.130(3)   |
| Nb1 - C5    | 2.134(3)   |
| Nb1 - C4    | 2.139(3)   |
| Nb1 - C3    | 2.139(3)   |
| Nb1 - C2    | 2.150(3)   |
| N1 - C19    | 1.514(4)   |
| N1 - C15    | 1.516(4)   |
| N1 - C13    | 1.519(4)   |
| N1 - C17    | 1.521(4)   |



|                 |            |                 |           |
|-----------------|------------|-----------------|-----------|
| C3 - Nb1 - Ag1  | 119.96(8)  | Nb1 - C5 - Ag1  | 72.71(10) |
| C2 - Nb1 - Ag1  | 128.64(9)  | O6 - C6 - Nb1   | 172.5(3)  |
| C19 - N1 - C15  | 106.2(2)   | O7 - C7 - Nb2   | 169.3(3)  |
| C19 - N1 - C13  | 110.9(2)   | O7 - C7 - Ag1   | 115.8(2)  |
| C15 - N1 - C13  | 111.4(2)   | Nb2 - C7 - Ag1  | 74.75(10) |
| C19 - N1 - C17  | 111.1(2)   | O8 - C8 - Nb2   | 176.4(3)  |
| C15 - N1 - C17  | 111.1(2)   | O9 - C9 - Nb2   | 177.9(3)  |
| C13 - N1 - C17  | 106.2(2)   | O10 - C10 - Nb2 | 178.3(3)  |
| C7 - Nb2 - C11  | 99.47(12)  | O11 - C11 - Nb2 | 173.1(3)  |
| C7 - Nb2 - C8   | 84.72(13)  | O12 - C12 - Nb2 | 171.0(3)  |
| C11 - Nb2 - C8  | 171.02(13) | O12 - C12 - Ag1 | 115.6(2)  |
| C7 - Nb2 - C12  | 106.80(12) | Nb2 - C12 - Ag1 | 72.89(10) |
| C11 - Nb2 - C12 | 98.00(12)  | C14 - C13 - N1  | 115.5(2)  |
| C8 - Nb2 - C12  | 88.29(13)  | N1 - C15 - C16  | 115.9(3)  |
| C7 - Nb2 - C9   | 81.82(12)  | C18 - C17 - N1  | 115.1(3)  |
| C11 - Nb2 - C9  | 84.78(12)  | N1 - C19 - C20  | 115.0(3)  |
| C8 - Nb2 - C9   | 87.98(13)  |                 |           |
| C12 - Nb2 - C9  | 170.25(12) |                 |           |
| C7 - Nb2 - C10  | 169.60(12) |                 |           |
| C11 - Nb2 - C10 | 83.93(13)  |                 |           |
| C8 - Nb2 - C10  | 90.61(14)  |                 |           |
| C12 - Nb2 - C10 | 82.28(13)  |                 |           |
| C9 - Nb2 - C10  | 88.75(12)  |                 |           |
| C7 - Nb2 - Ag1  | 59.56(8)   |                 |           |
| C11 - Nb2 - Ag1 | 70.73(8)   |                 |           |
| C8 - Nb2 - Ag1  | 118.11(11) |                 |           |
| C12 - Nb2 - Ag1 | 61.22(8)   |                 |           |
| C9 - Nb2 - Ag1  | 128.32(8)  |                 |           |
| C10 - Nb2 - Ag1 | 130.63(9)  |                 |           |
| O2 - C2 - Nb1   | 177.4(3)   |                 |           |
| O4 - C4 - Nb1   | 179.4(3)   |                 |           |
| O3 - C3 - Nb1   | 178.0(3)   |                 |           |
| O5 - C5 - Nb1   | 170.7(3)   |                 |           |
| O5 - C5 - Ag1   | 116.3(2)   |                 |           |

Table 3. Torsion angles for p21c\_all\_a-finalcif.cif.

| Atom - Atom - Atom - Atom | Torsion Angle [°] |
|---------------------------|-------------------|
| C19 - N1 - C13 - C14      | 53.5(3)           |
| C15 - N1 - C13 - C14      | -64.6(3)          |
| C17 - N1 - C13 - C14      | 174.3(3)          |
| C19 - N1 - C15 - C16      | 174.5(3)          |
| C13 - N1 - C15 - C16      | -64.6(3)          |
| C17 - N1 - C15 - C16      | 53.5(3)           |
| C19 - N1 - C17 - C18      | -62.1(4)          |
| C15 - N1 - C17 - C18      | 55.9(4)           |
| C13 - N1 - C17 - C18      | 177.2(3)          |
| C15 - N1 - C19 - C20      | 177.5(3)          |
| C13 - N1 - C19 - C20      | 56.3(3)           |
| C17 - N1 - C19 - C20      | -61.6(3)          |

### Structure of **1b**

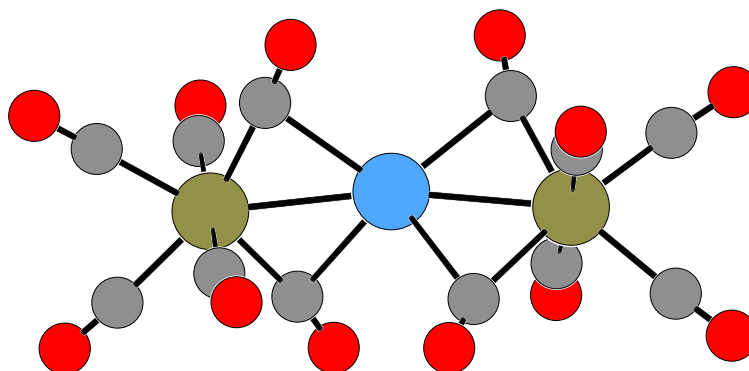

Fig. S16. Enlarged molecule from molecular structure of **1b**.

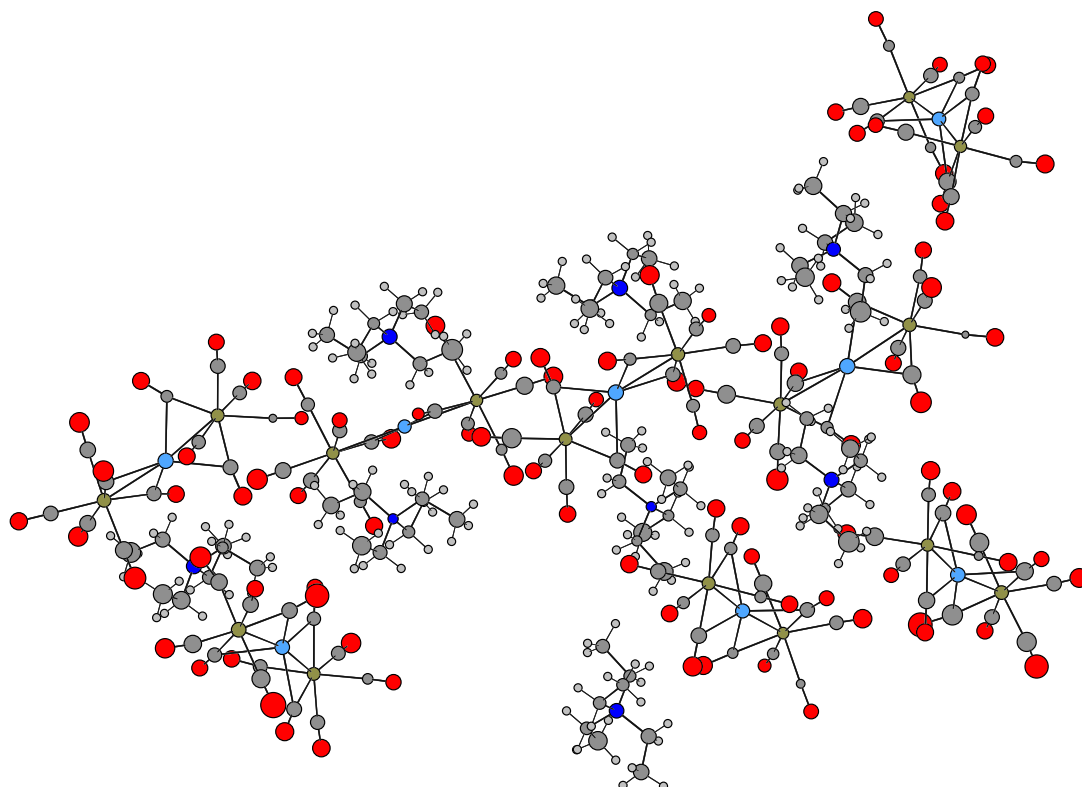

**Fig. S17.** Molecular structure of **1b**. The molecules are shown isotropically due to poor crystallographic data.

### Structure of **2a**

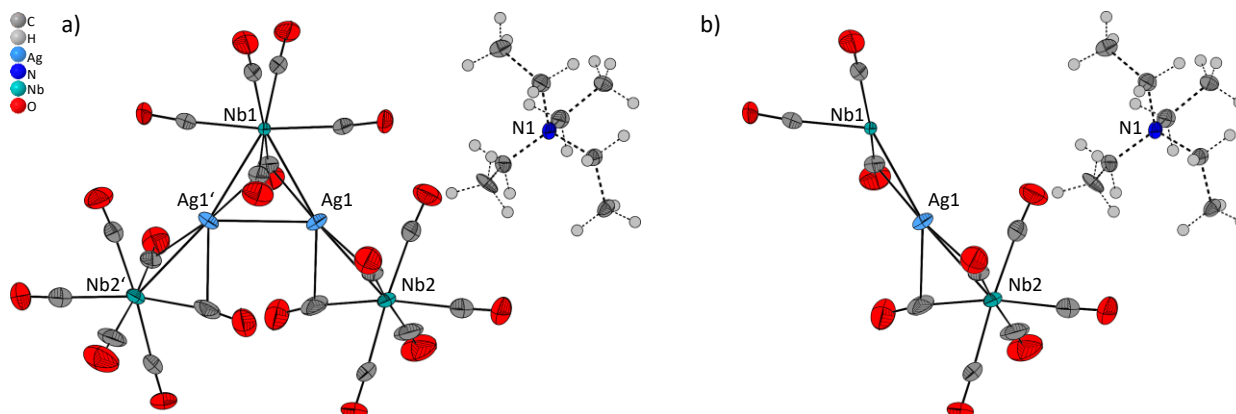

**Fig. S18.** Molecular structure (a) and asymmetric unit (b) of **2a**. [NET<sub>4</sub>]<sup>+</sup> is disordered around its special position. Thermal ellipsoids are shown at the 50 % probability level.

## Structure Tables

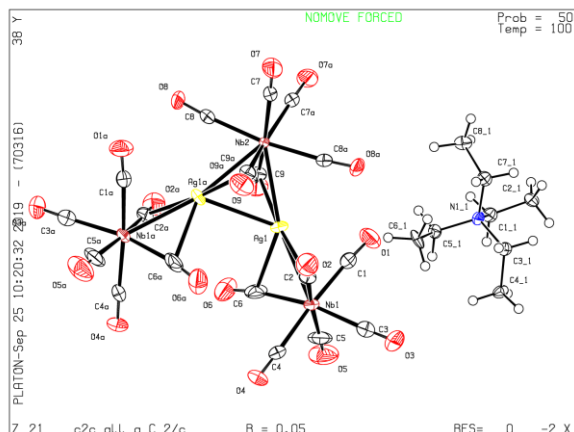

Table 1. Crystal data and structure refinement for c2c\_all\_a - final-finalcif.cif

|                                                              |                                                                                  |
|--------------------------------------------------------------|----------------------------------------------------------------------------------|
| CCDC number                                                  | 1998851                                                                          |
| Empirical formula                                            | C <sub>26</sub> H <sub>20</sub> Ag <sub>2</sub> NNb <sub>3</sub> O <sub>18</sub> |
| Formula weight                                               | 1128.90                                                                          |
| Temperature [K]                                              | 100(2)                                                                           |
| Crystal system                                               | monoclinic                                                                       |
| Space group (number)                                         | C2/c (15)                                                                        |
| <i>a</i> [Å]                                                 | 19.244(3)                                                                        |
| <i>b</i> [Å]                                                 | 10.5949(16)                                                                      |
| <i>c</i> [Å]                                                 | 18.888(2)                                                                        |
| $\alpha$ [Å]                                                 | 90                                                                               |
| $\beta$ [Å]                                                  | 105.273(3)                                                                       |
| $\gamma$ [Å]                                                 | 90                                                                               |
| Volume [Å <sup>3</sup> ]                                     | 3715.0(9)                                                                        |
| <i>Z</i>                                                     | 4                                                                                |
| $\rho_{\text{calc}}$ [g/cm <sup>3</sup> ]                    | 2.018                                                                            |
| $\mu$ [mm <sup>-1</sup> ]                                    | 2.005                                                                            |
| <i>F</i> (000)                                               | 2176                                                                             |
| Crystal size [mm <sup>3</sup> ]                              | 0.100×0.100×0.030                                                                |
| Crystal colour                                               | red                                                                              |
| Crystal shape                                                | block                                                                            |
| Radiation                                                    | MoK $\alpha$ ( $\lambda$ =0.71073)                                               |
| 2 $\theta$ range [°]                                         | 4.39 to 50.26                                                                    |
| Index ranges                                                 | -17 ≤ <i>h</i> ≤ 22, -12 ≤ <i>k</i> ≤ 12,<br>-22 ≤ <i>l</i> ≤ 21                 |
| Reflections collected                                        | 16972                                                                            |
| Independent reflections                                      | 3314, <i>R</i> <sub>int</sub> = 0.0960,<br><i>R</i> <sub>sigma</sub> = 0.0853    |
| Completeness to $\theta$ =<br>25.128°                        | 99.70                                                                            |
| Data / Restraints /<br>Parameters                            | 3314/144/274                                                                     |
| Goodness-of-fit on <i>F</i> <sup>2</sup>                     | 1.069                                                                            |
| Final <i>R</i> indexes [ <i>I</i> ≥ 2 $\sigma$ ( <i>I</i> )] | <i>R</i> <sub>1</sub> = 0.0475, <i>wR</i> <sub>2</sub> = 0.0833                  |
| Final <i>R</i> indexes [all data]                            | <i>R</i> <sub>1</sub> = 0.0906, <i>wR</i> <sub>2</sub> = 0.0939                  |
| Largest peak/hole [eÅ <sup>-3</sup> ]                        | 0.73/-1.03                                                                       |

Table 2. Bond lengths and angles for c2c\_all\_a - final-finalcif.cif.

| Atom - Atom                  | Length [Å] |
|------------------------------|------------|
| Ag1 - C6                     | 2.505(7)   |
| Ag1 - C9                     | 2.551(7)   |
| Ag1 - C2                     | 2.629(8)   |
| Ag1 - Nb1                    | 2.8081(8)  |
| Ag1 - Nb2                    | 2.8672(8)  |
| Ag1 - Ag1 <sup>#1</sup>      | 2.8891(11) |
| O1 - C1                      | 1.164(8)   |
| C1 - Nb1                     | 2.109(8)   |
| Nb1 - C6                     | 2.107(9)   |
| Nb1 - C4                     | 2.119(8)   |
| Nb1 - C2                     | 2.122(9)   |
| Nb1 - C5                     | 2.141(10)  |
| Nb1 - C3                     | 2.149(9)   |
| Nb2 - C9                     | 2.124(8)   |
| Nb2 - C9 <sup>#1</sup>       | 2.124(8)   |
| Nb2 - C8 <sup>#1</sup>       | 2.126(7)   |
| Nb2 - C8                     | 2.126(7)   |
| Nb2 - C7 <sup>#1</sup>       | 2.164(7)   |
| Nb2 - C7                     | 2.164(7)   |
| O2 - C2                      | 1.157(9)   |
| O5 - C5                      | 1.146(9)   |
| C4 - O4                      | 1.150(8)   |
| C3 - O3                      | 1.133(9)   |
| C6 - O6                      | 1.160(9)   |
| C7 - O7                      | 1.126(8)   |
| C8 - O8                      | 1.149(7)   |
| C9 - O9                      | 1.152(8)   |
| N1_1 - C7_1                  | 1.515(13)  |
| N1_1 - C5_1                  | 1.516(13)  |
| N1_1 - C1_1                  | 1.517(13)  |
| N1_1 - C3_1                  | 1.519(13)  |
| C1_1 - C2_1                  | 1.514(13)  |
| C3_1 - C4_1                  | 1.502(13)  |
| C5_1 - C6_1                  | 1.507(13)  |
| C7_1 - C8_1                  | 1.508(13)  |
| Atom - Atom - Atom           | Angle [°]  |
| C6 - Ag1 - C9                | 103.8(3)   |
| C6 - Ag1 - C2                | 80.8(3)    |
| C9 - Ag1 - C2                | 174.2(2)   |
| C6 - Ag1 - Nb1               | 46.3(2)    |
| C9 - Ag1 - Nb1               | 135.70(18) |
| C2 - Ag1 - Nb1               | 45.80(19)  |
| C6 - Ag1 - Nb2               | 144.1(2)   |
| C9 - Ag1 - Nb2               | 45.70(17)  |
| C2 - Ag1 - Nb2               | 131.21(19) |
| Nb1 - Ag1 - Nb2              | 167.49(3)  |
| C6 - Ag1 - Ag1 <sup>#1</sup> | 91.5(2)    |
| C9 - Ag1 - Ag1 <sup>#1</sup> | 62.69(16)  |
| C2 - Ag1 - Ag1 <sup>#1</sup> | 121.24(17) |

|                                            |             |                    |           |
|--------------------------------------------|-------------|--------------------|-----------|
| Nb1 - Ag1 - Ag1 <sup>#1</sup>              | 132.743(18) | O5 - C5 - Nb1      | 177.3(8)  |
| Nb2 - Ag1 - Ag1 <sup>#1</sup>              | 59.747(14)  | O4 - C4 - Nb1      | 178.0(6)  |
| O1 - C1 - Nb1                              | 175.7(6)    | O3 - C3 - Nb1      | 177.6(7)  |
| C6 - Nb1 - C1                              | 101.0(3)    | O6 - C6 - Nb1      | 170.7(6)  |
| C6 - Nb1 - C4                              | 80.9(3)     | O6 - C6 - Ag1      | 114.8(5)  |
| C1 - Nb1 - C4                              | 175.2(3)    | Nb1 - C6 - Ag1     | 74.5(2)   |
| C6 - Nb1 - C2                              | 103.8(3)    | O7 - C7 - Nb2      | 178.0(6)  |
| C1 - Nb1 - C2                              | 96.5(3)     | O8 - C8 - Nb2      | 175.2(5)  |
| C4 - Nb1 - C2                              | 87.3(3)     | O9 - C9 - Nb2      | 170.6(6)  |
| C6 - Nb1 - C5                              | 82.3(3)     | O9 - C9 - Ag1      | 113.9(5)  |
| C1 - Nb1 - C5                              | 86.0(3)     | Nb2 - C9 - Ag1     | 75.0(2)   |
| C4 - Nb1 - C5                              | 90.0(3)     | C7_1 - N1_1 - C5_1 | 111.9(10) |
| C2 - Nb1 - C5                              | 172.8(3)    | C7_1 - N1_1 - C1_1 | 110.5(9)  |
| C6 - Nb1 - C3                              | 169.5(3)    | C5_1 - N1_1 - C1_1 | 106.9(11) |
| C1 - Nb1 - C3                              | 86.2(3)     | C7_1 - N1_1 - C3_1 | 106.9(10) |
| C4 - Nb1 - C3                              | 91.3(3)     | C5_1 - N1_1 - C3_1 | 110.5(9)  |
| C2 - Nb1 - C3                              | 82.8(3)     | C1_1 - N1_1 - C3_1 | 110.3(10) |
| C5 - Nb1 - C3                              | 90.6(3)     | C2_1 - C1_1 - N1_1 | 116.3(10) |
| C6 - Nb1 - Ag1                             | 59.26(18)   | C4_1 - C3_1 - N1_1 | 116.4(10) |
| C1 - Nb1 - Ag1                             | 66.29(19)   | C6_1 - C5_1 - N1_1 | 116.4(10) |
| C4 - Nb1 - Ag1                             | 118.26(19)  | C8_1 - C7_1 - N1_1 | 116.2(10) |
| C2 - Nb1 - Ag1                             | 62.63(19)   |                    |           |
| C5 - Nb1 - Ag1                             | 124.4(2)    |                    |           |
| C3 - Nb1 - Ag1                             | 131.2(2)    |                    |           |
| C9 - Nb2 - C9 <sup>#1</sup>                | 117.8(4)    |                    |           |
| C9 - Nb2 - C8 <sup>#1</sup>                | 96.5(3)     |                    |           |
| C9 <sup>#1</sup> - Nb2 - C8 <sup>#1</sup>  | 87.3(3)     |                    |           |
| C9 - Nb2 - C8                              | 87.3(3)     |                    |           |
| C9 <sup>#1</sup> - Nb2 - C8                | 96.5(3)     |                    |           |
| C8 <sup>#1</sup> - Nb2 - C8                | 172.6(3)    |                    |           |
| C9 - Nb2 - C7 <sup>#1</sup>                | 79.8(3)     |                    |           |
| C9 <sup>#1</sup> - Nb2 - C7 <sup>#1</sup>  | 161.3(3)    |                    |           |
| C8 <sup>#1</sup> - Nb2 - C7 <sup>#1</sup>  | 84.4(3)     |                    |           |
| C8 - Nb2 - C7 <sup>#1</sup>                | 90.1(2)     |                    |           |
| C9 - Nb2 - C7                              | 161.3(3)    |                    |           |
| C9 <sup>#1</sup> - Nb2 - C7                | 79.8(3)     |                    |           |
| C8 <sup>#1</sup> - Nb2 - C7                | 90.1(2)     |                    |           |
| C8 - Nb2 - C7                              | 84.4(3)     |                    |           |
| C7 <sup>#1</sup> - Nb2 - C7                | 83.5(4)     |                    |           |
| C9 - Nb2 - Ag1                             | 59.26(18)   |                    |           |
| C9 <sup>#1</sup> - Nb2 - Ag1               | 67.60(18)   |                    |           |
| C8 <sup>#1</sup> - Nb2 - Ag1               | 64.41(16)   |                    |           |
| C8 - Nb2 - Ag1                             | 122.92(17)  |                    |           |
| C7 <sup>#1</sup> - Nb2 - Ag1               | 122.62(18)  |                    |           |
| C7 - Nb2 - Ag1                             | 138.58(19)  |                    |           |
| C9 - Nb2 - Ag1 <sup>#1</sup>               | 67.60(18)   |                    |           |
| C9 <sup>#1</sup> - Nb2 - Ag1 <sup>#1</sup> | 59.26(18)   |                    |           |
| C8 <sup>#1</sup> - Nb2 - Ag1 <sup>#1</sup> | 122.92(16)  |                    |           |
| C8 - Nb2 - Ag1 <sup>#1</sup>               | 64.41(16)   |                    |           |
| C7 <sup>#1</sup> - Nb2 - Ag1 <sup>#1</sup> | 138.58(19)  |                    |           |
| C7 - Nb2 - Ag1 <sup>#1</sup>               | 122.61(18)  |                    |           |
| Ag1 - Nb2 - Ag1 <sup>#1</sup>              | 60.51(3)    |                    |           |
| O2 - C2 - Nb1                              | 174.9(7)    |                    |           |
| O2 - C2 - Ag1                              | 113.4(5)    |                    |           |
| Nb1 - C2 - Ag1                             | 71.6(3)     |                    |           |

Symmetry transformations used to generate equivalent atoms: #1: 1-X, +Y, 1.5-Z;

## Structure of **2b**

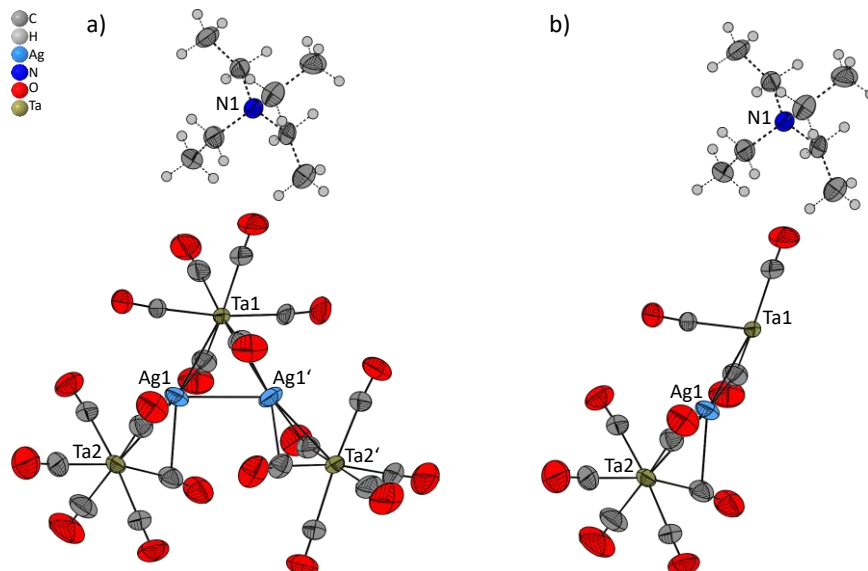

**Fig. S19.** Molecular structure (a) and asymmetric unit (b) of **2b**. Thermal ellipsoids are shown at the 50 % probability level.

Nb3, Ta3 and the cations  $[\text{NEt}_4]^+$  are located on a special position in both structures of **2a** and **2b**. **2b** was measured at 200 K, since at 100 K the superlattice was obtained.

## Structure Tables

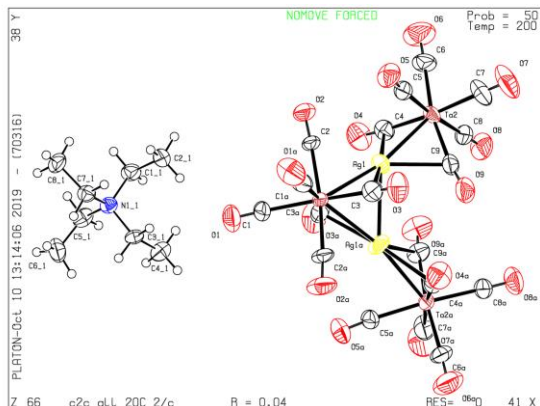

Table 1. Crystal data and structure refinement for c2c\_all\_200\_a-finalcif.cif

|                                                             |                                                                                  |
|-------------------------------------------------------------|----------------------------------------------------------------------------------|
| CCDC number                                                 | 1998852                                                                          |
| Empirical formula                                           | C <sub>26</sub> H <sub>20</sub> Ag <sub>2</sub> NO <sub>18</sub> Ta <sub>3</sub> |
| Formula weight                                              | 1393.02                                                                          |
| Temperature [K]                                             | 200(2)                                                                           |
| Crystal system                                              | monoclinic                                                                       |
| Space group (number)                                        | C2/c (15)                                                                        |
| <i>a</i> [Å]                                                | 19.412(5)                                                                        |
| <i>b</i> [Å]                                                | 10.642(2)                                                                        |
| <i>c</i> [Å]                                                | 18.956(3)                                                                        |
| $\alpha$ [Å]                                                | 90                                                                               |
| $\beta$ [Å]                                                 | 105.126(12)                                                                      |
| $\gamma$ [Å]                                                | 90                                                                               |
| Volume [Å <sup>3</sup> ]                                    | 3780.1(14)                                                                       |
| <i>Z</i>                                                    | 4                                                                                |
| $\rho_{\text{calc}}$ [g/cm <sup>3</sup> ]                   | 2.448                                                                            |
| $\mu$ [mm <sup>-1</sup> ]                                   | 9.739                                                                            |
| <i>F</i> (000)                                              | 2560                                                                             |
| Crystal size [mm <sup>3</sup> ]                             | 0.200×0.200×0.050                                                                |
| Crystal colour                                              | red                                                                              |
| Crystal shape                                               | plate                                                                            |
| Radiation                                                   | MoK $\alpha$ ( $\lambda$ =0.71073)                                               |
| 2 $\theta$ range [°]                                        | 4.35 to 56.78                                                                    |
| Index ranges                                                | -25 ≤ <i>h</i> ≤ 25, -14 ≤ <i>k</i> ≤ 14,<br>-25 ≤ <i>l</i> ≤ 24                 |
| Reflections collected                                       | 39095                                                                            |
| Independent reflections                                     | 4713, <i>R</i> <sub>int</sub> = 0.0362,<br><i>R</i> <sub>sigma</sub> = 0.0244    |
| Completeness to $\theta = 25.242^\circ$                     | 99.90                                                                            |
| Data / Restraints / Parameters                              | 4713/129/271                                                                     |
| Goodness-of-fit on <i>F</i> <sup>2</sup>                    | 1.156                                                                            |
| Final <i>R</i> indexes [ <i>I</i> ≥2 $\sigma$ ( <i>I</i> )] | <i>R</i> <sub>1</sub> = 0.0352, <i>wR</i> <sub>2</sub> = 0.1181                  |
| Final <i>R</i> indexes [all data]                           | <i>R</i> <sub>1</sub> = 0.0372, <i>wR</i> <sub>2</sub> = 0.1203                  |
| Largest peak/hole [eÅ <sup>-3</sup> ]                       | 1.60/-1.87                                                                       |

Table 2. Bond lengths and angles for c2c\_all\_200\_a-finalcif.cif.

| Atom - Atom             | Length [Å] |
|-------------------------|------------|
| Ag1 - C9                | 2.524(7)   |
| Ag1 - C3                | 2.568(7)   |
| Ag1 - C4                | 2.597(7)   |
| Ag1 - Ta2               | 2.8166(6)  |
| Ag1 - Ta1               | 2.8710(7)  |
| Ag1 - Ag1 <sup>#1</sup> | 2.8818(12) |
| Ta1 - C3                | 2.110(8)   |
| Ta1 - C3 <sup>#1</sup>  | 2.110(8)   |
| Ta1 - C2 <sup>#1</sup>  | 2.111(6)   |
| Ta1 - C2                | 2.111(6)   |
| Ta1 - C1 <sup>#1</sup>  | 2.141(7)   |
| Ta1 - C1                | 2.141(7)   |
| O1 - C1                 | 1.124(10)  |
| C5 - O5                 | 1.134(9)   |
| C5 - Ta2                | 2.114(7)   |
| C4 - O4                 | 1.157(9)   |
| C4 - Ta2                | 2.091(7)   |
| C3 - O3                 | 1.152(10)  |
| Ta2 - C9                | 2.105(8)   |
| Ta2 - C6                | 2.108(9)   |
| Ta2 - C8                | 2.110(7)   |
| Ta2 - C7                | 2.128(8)   |
| O2 - C2                 | 1.150(9)   |
| O6 - C6                 | 1.151(12)  |
| C7 - O7                 | 1.131(11)  |
| C8 - O8                 | 1.139(9)   |
| C9 - O9                 | 1.139(10)  |
| N1_1 - C3_1             | 1.514(12)  |
| N1_1 - C7_1             | 1.520(13)  |
| N1_1 - C5_1             | 1.522(12)  |
| N1_1 - C1_1             | 1.524(13)  |
| C1_1 - C2_1             | 1.522(17)  |
| C3_1 - C4_1             | 1.518(15)  |
| C5_1 - C6_1             | 1.530(17)  |
| C7_1 - C8_1             | 1.535(14)  |
| Atom - Atom - Atom      | Angle [°]  |
| C9 - Ag1 - C3           | 102.8(3)   |
| C9 - Ag1 - C4           | 80.9(2)    |
| C3 - Ag1 - C4           | 173.5(2)   |
| C9 - Ag1 - Ta2          | 46.02(17)  |
| C3 - Ag1 - Ta2          | 134.61(19) |
| C4 - Ag1 - Ta2          | 45.21(16)  |
| C9 - Ag1 - Ta1          | 143.21(17) |
| C3 - Ag1 - Ta1          | 45.23(18)  |
| C4 - Ag1 - Ta1          | 132.97(17) |

|                                            |             |                    |           |
|--------------------------------------------|-------------|--------------------|-----------|
| Ta2 - Ag1 - Ta1                            | 167.40(3)   | C6 - Ta2 - C5      | 86.9(3)   |
| C9 - Ag1 - Ag1 <sup>#1</sup>               | 91.53(18)   | C8 - Ta2 - C5      | 175.0(3)  |
| C3 - Ag1 - Ag1 <sup>#1</sup>               | 62.51(18)   | C4 - Ta2 - C7      | 171.8(4)  |
| C4 - Ag1 - Ag1 <sup>#1</sup>               | 123.13(17)  | C9 - Ta2 - C7      | 82.3(4)   |
| Ta2 - Ag1 - Ag1 <sup>#1</sup>              | 132.679(15) | C6 - Ta2 - C7      | 88.9(4)   |
| Ta1 - Ag1 - Ag1 <sup>#1</sup>              | 59.874(14)  | C8 - Ta2 - C7      | 90.0(3)   |
| C3 - Ta1 - C3 <sup>#1</sup>                | 118.4(4)    | C5 - Ta2 - C7      | 85.7(3)   |
| C3 - Ta1 - C2 <sup>#1</sup>                | 87.4(3)     | C4 - Ta2 - Ag1     | 61.8(2)   |
| C3 <sup>#1</sup> - Ta1 - C2 <sup>#1</sup>  | 96.6(3)     | C9 - Ta2 - Ag1     | 59.6(2)   |
| C3 - Ta1 - C2                              | 96.6(3)     | C6 - Ta2 - Ag1     | 131.8(3)  |
| C3 <sup>#1</sup> - Ta1 - C2                | 87.4(3)     | C8 - Ta2 - Ag1     | 117.8(2)  |
| C2 <sup>#1</sup> - Ta1 - C2                | 172.2(4)    | C5 - Ta2 - Ag1     | 66.92(19) |
| C3 - Ta1 - C1 <sup>#1</sup>                | 80.3(3)     | C7 - Ta2 - Ag1     | 126.1(3)  |
| C3 <sup>#1</sup> - Ta1 - C1 <sup>#1</sup>  | 160.4(3)    | O2 - C2 - Ta1      | 175.7(7)  |
| C2 <sup>#1</sup> - Ta1 - C1 <sup>#1</sup>  | 89.8(3)     | O6 - C6 - Ta2      | 177.6(9)  |
| C2 - Ta1 - C1 <sup>#1</sup>                | 84.3(3)     | O7 - C7 - Ta2      | 178.3(11) |
| C3 - Ta1 - C1                              | 160.4(3)    | O8 - C8 - Ta2      | 178.4(7)  |
| C3 <sup>#1</sup> - Ta1 - C1                | 80.3(3)     | O9 - C9 - Ta2      | 171.3(7)  |
| C2 <sup>#1</sup> - Ta1 - C1                | 84.3(3)     | O9 - C9 - Ag1      | 114.4(6)  |
| C2 - Ta1 - C1                              | 89.8(3)     | Ta2 - C9 - Ag1     | 74.3(2)   |
| C1 <sup>#1</sup> - Ta1 - C1                | 81.9(5)     | C3_1 - N1_1 - C7_1 | 106.9(10) |
| C3 - Ta1 - Ag1 <sup>#1</sup>               | 67.5(2)     | C3_1 - N1_1 - C5_1 | 110.8(10) |
| C3 <sup>#1</sup> - Ta1 - Ag1 <sup>#1</sup> | 59.77(19)   | C7_1 - N1_1 - C5_1 | 111.3(10) |
| C2 <sup>#1</sup> - Ta1 - Ag1 <sup>#1</sup> | 64.63(18)   | C3_1 - N1_1 - C1_1 | 111.1(9)  |
| C2 - Ta1 - Ag1 <sup>#1</sup>               | 123.05(19)  | C7_1 - N1_1 - C1_1 | 111.2(10) |
| C1 <sup>#1</sup> - Ta1 - Ag1 <sup>#1</sup> | 138.9(3)    | C5_1 - N1_1 - C1_1 | 105.7(11) |
| C1 - Ta1 - Ag1 <sup>#1</sup>               | 123.6(2)    | C2_1 - C1_1 - N1_1 | 114.5(11) |
| C3 - Ta1 - Ag1                             | 59.77(19)   | N1_1 - C3_1 - C4_1 | 115.6(10) |
| C3 <sup>#1</sup> - Ta1 - Ag1               | 67.5(2)     | N1_1 - C5_1 - C6_1 | 113.5(13) |
| C2 <sup>#1</sup> - Ta1 - Ag1               | 123.05(19)  | N1_1 - C7_1 - C8_1 | 114.4(10) |
| C2 - Ta1 - Ag1                             | 64.63(18)   |                    |           |
| C1 <sup>#1</sup> - Ta1 - Ag1               | 123.6(2)    |                    |           |
| C1 - Ta1 - Ag1                             | 138.9(3)    |                    |           |
| Ag1 <sup>#1</sup> - Ta1 - Ag1              | 60.25(3)    |                    |           |
| O1 - C1 - Ta1                              | 177.4(9)    |                    |           |
| O5 - C5 - Ta2                              | 175.7(7)    |                    |           |
| O4 - C4 - Ta2                              | 173.7(7)    |                    |           |
| O4 - C4 - Ag1                              | 113.3(6)    |                    |           |
| Ta2 - C4 - Ag1                             | 73.0(2)     |                    |           |
| O3 - C3 - Ta1                              | 169.6(7)    |                    |           |
| O3 - C3 - Ag1                              | 114.8(6)    |                    |           |
| Ta1 - C3 - Ag1                             | 75.0(2)     |                    |           |
| C4 - Ta2 - C9                              | 104.8(3)    |                    |           |
| C4 - Ta2 - C6                              | 83.5(4)     |                    |           |
| C9 - Ta2 - C6                              | 168.6(3)    |                    |           |
| C4 - Ta2 - C8                              | 87.1(3)     |                    |           |
| C9 - Ta2 - C8                              | 82.2(3)     |                    |           |
| C6 - Ta2 - C8                              | 90.6(3)     |                    |           |
| C4 - Ta2 - C5                              | 96.8(3)     |                    |           |
| C9 - Ta2 - C5                              | 99.7(3)     |                    |           |

Symmetry transformations used to generate equivalent atoms: #1: 1-X, +Y, 0.5-Z;

Table 3. Torsion angles for c2c\_all\_200\_a-finalcif.cif.

| Atom - Atom - Atom - Atom | Torsion Angle [°] |
|---------------------------|-------------------|
| C3_1 - N1_1 - C1_1 - C2_1 | -53.8(17)         |
| C7_1 - N1_1 - C1_1 - C2_1 | 65.1(17)          |
| C5_1 - N1_1 - C1_1 - C2_1 | -174.0(14)        |
| C7_1 - N1_1 - C3_1 - C4_1 | -177.0(12)        |
| C5_1 - N1_1 - C3_1 - C4_1 | 61.6(15)          |
| C1_1 - N1_1 - C3_1 - C4_1 | -55.6(15)         |
| C3_1 - N1_1 - C5_1 - C6_1 | 61.0(18)          |
| C7_1 - N1_1 - C5_1 - C6_1 | -57.8(18)         |
| C1_1 - N1_1 - C5_1 - C6_1 | -178.6(15)        |
| C3_1 - N1_1 - C7_1 - C8_1 | -176.7(12)        |
| C5_1 - N1_1 - C7_1 - C8_1 | -55.7(15)         |
| C1_1 - N1_1 - C7_1 - C8_1 | 61.9(15)          |

## Structure of **3a**

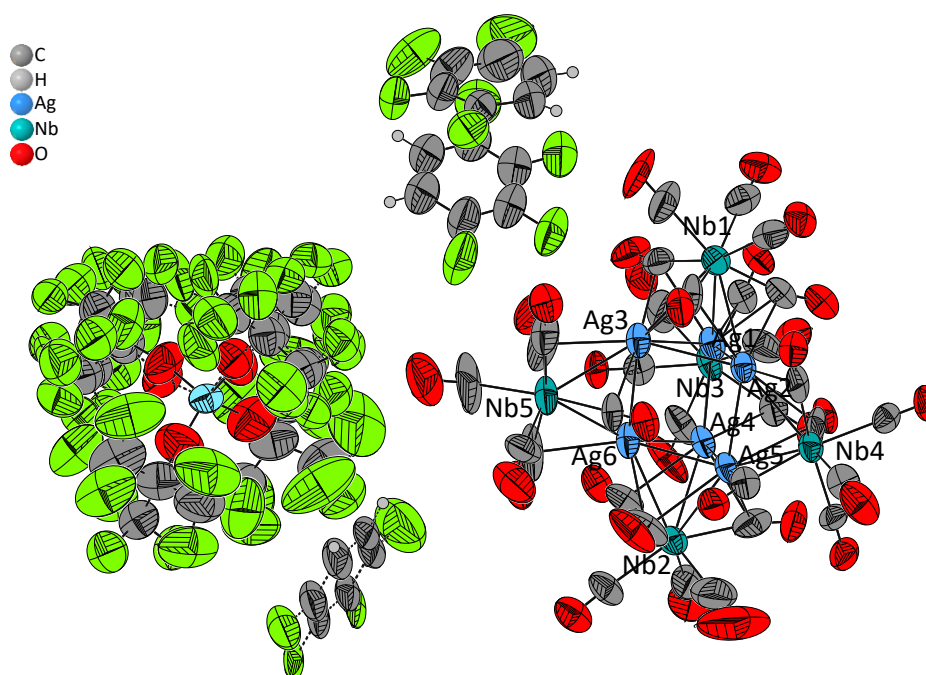

**Fig. S20.** Molecular structure of **3a**. Thermal ellipsoids are shown at the 50 % probability level.

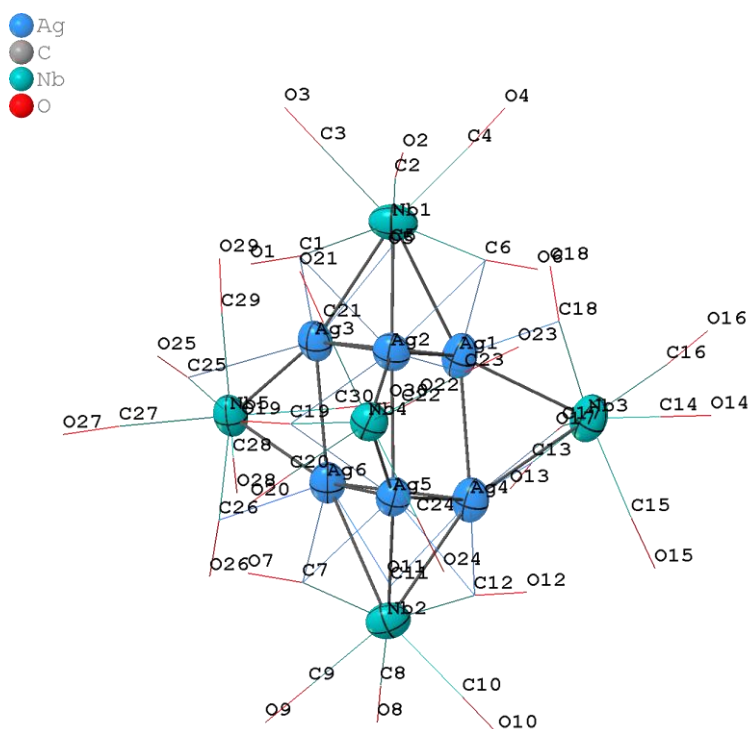

**Fig. S21.** Enlarged and labeled molecular structure of **3a<sup>+</sup>**. Thermal ellipsoids are shown at the 50 % probability level.



## Structure Tables

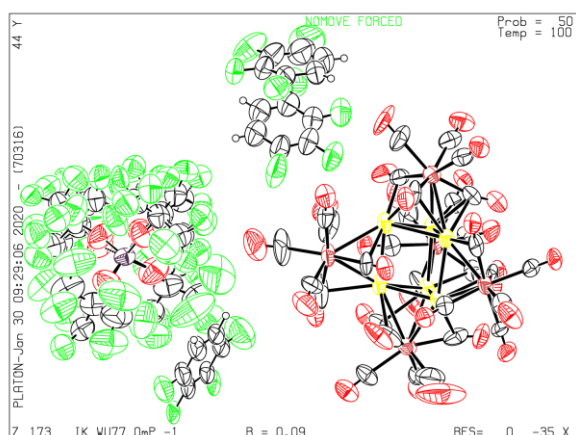

Table 1. Crystal data and structure refinement for IK\_WU77\_0m-finalcif.cif

|                                                |                                                                                                  |
|------------------------------------------------|--------------------------------------------------------------------------------------------------|
| CCDC number                                    | 1998853                                                                                          |
| Empirical formula                              | C <sub>61</sub> H <sub>5</sub> Ag <sub>6</sub> AlF <sub>46</sub> Nb <sub>5</sub> O <sub>34</sub> |
| Formula weight                                 | 3294.40                                                                                          |
| Temperature [K]                                | 100.0                                                                                            |
| Crystal system                                 | triclinic                                                                                        |
| Space group (number)                           | $P\bar{1}$ (2)                                                                                   |
| <i>a</i> [Å]                                   | 17.242(6)                                                                                        |
| <i>b</i> [Å]                                   | 18.251(4)                                                                                        |
| <i>c</i> [Å]                                   | 18.301(4)                                                                                        |
| $\alpha$ [Å]                                   | 77.593(10)                                                                                       |
| $\beta$ [Å]                                    | 63.291(16)                                                                                       |
| $\gamma$ [Å]                                   | 62.504(10)                                                                                       |
| Volume [Å <sup>3</sup> ]                       | 4563(2)                                                                                          |
| <i>Z</i>                                       | 2                                                                                                |
| $\rho_{\text{calc}}$ [g/cm <sup>3</sup> ]      | 2.398                                                                                            |
| $\mu$ [mm <sup>-1</sup> ]                      | 16.727                                                                                           |
| <i>F</i> (000)                                 | 3114                                                                                             |
| Crystal size [mm <sup>3</sup> ]                | 0.08×0.07×0.02                                                                                   |
| Crystal colour                                 | red                                                                                              |
| Crystal shape                                  | plate                                                                                            |
| Radiation                                      | CuK $\alpha$ ( $\lambda$ =1.54178)                                                               |
| 2 $\theta$ range [°]                           | 5.41 to 109.91                                                                                   |
| Index ranges                                   | -17 ≤ <i>h</i> ≤ 17, -18 ≤ <i>k</i> ≤ 19, -19 ≤ <i>l</i> ≤ 19                                    |
| Reflections collected                          | 58871                                                                                            |
| Independent reflections                        | 11089, $R_{\text{int}} = 0.1317$ ,<br>$R_{\text{sigma}} = 0.1087$                                |
| Completeness to $\theta = 54.953^\circ$        | 96.70                                                                                            |
| Data / Restraints / Parameters                 | 11089/7758/1677                                                                                  |
| Goodness-of-fit on $F^2$                       | 1.043                                                                                            |
| Final <i>R</i> indexes [ $I \geq 2\sigma(I)$ ] | $R_1 = 0.0945$ , $wR_2 = 0.2487$                                                                 |
| Final <i>R</i> indexes [all data]              | $R_1 = 0.1421$ , $wR_2 = 0.2899$                                                                 |
| Largest peak/hole [eÅ <sup>-3</sup> ]          | 2.21/-1.44                                                                                       |

Table 2. Bond lengths and angles for IK\_WU77\_0m-finalcif.cif.

| Atom - Atom | Length [Å] |
|-------------|------------|
| Ag1 - C6    | 2.57(3)    |
| Ag1 - C18   | 2.57(3)    |
| Ag1 - Ag4   | 2.825(2)   |
| Ag1 - Ag2   | 2.828(2)   |
| Ag1 - Ag3   | 2.834(2)   |
| Ag1 - Nb3   | 2.910(3)   |
| Ag1 - Nb1   | 3.067(3)   |
| O1 - C1     | 1.13(3)    |
| Nb1 - C2    | 2.07(5)    |
| Nb1 - C6    | 2.07(3)    |
| Nb1 - C5    | 2.11(3)    |
| Nb1 - C3    | 2.16(3)    |
| Nb1 - C4    | 2.17(3)    |
| Nb1 - C1    | 2.19(4)    |
| Nb1 - Ag3   | 2.941(3)   |
| Nb1 - Ag2   | 2.963(2)   |
| Al1 - O1_4  | 1.637(15)  |
| Al1 - O1_2  | 1.639(15)  |
| Al1 - O1_8  | 1.649(18)  |
| Al1 - O1_1  | 1.671(16)  |
| Al1 - O1_3  | 1.671(15)  |
| Al1 - O1_7  | 1.680(17)  |
| C1 - Ag3    | 2.61(3)    |
| C1 - Ag2    | 2.64(3)    |
| Ag2 - C23   | 2.63(2)    |
| Ag2 - C19   | 2.65(2)    |
| Ag2 - C6    | 2.69(3)    |
| Ag2 - Ag5   | 2.833(2)   |
| Ag2 - Nb4   | 2.901(2)   |
| Ag2 - Ag3   | 2.928(2)   |
| O2 - C2     | 1.17(5)    |
| Nb2 - C12   | 2.02(3)    |
| Nb2 - C7    | 2.06(3)    |
| Nb2 - C8    | 2.14(3)    |
| Nb2 - C11   | 2.17(3)    |
| Nb2 - C9    | 2.20(4)    |
| Nb2 - C10   | 2.23(3)    |
| Nb2 - Ag4   | 2.961(3)   |
| Nb2 - Ag5   | 2.995(3)   |
| Nb2 - Ag6   | 3.056(2)   |
| Nb3 - C13   | 2.07(4)    |
| Nb3 - C16   | 2.07(4)    |
| Nb3 - C14   | 2.09(4)    |
| Nb3 - C17   | 2.10(3)    |
| Nb3 - C18   | 2.13(4)    |
| Nb3 - C15   | 2.15(3)    |
| Nb3 - Ag4   | 2.913(3)   |
| O3 - C3     | 1.13(3)    |
| Ag3 - C25   | 2.59(2)    |
| Ag3 - C5    | 2.59(3)    |
| Ag3 - Ag6   | 2.776(2)   |
| Ag3 - Nb5   | 2.891(3)   |
| Nb4 - C24   | 2.09(3)    |
| Nb4 - C19   | 2.11(3)    |
| Nb4 - C23   | 2.13(3)    |
| Nb4 - C20   | 2.14(3)    |
| Nb4 - C21   | 2.15(2)    |

|             |           |             |           |
|-------------|-----------|-------------|-----------|
| Nb4 - C22   | 2.15(3)   | C4_1 - F8_1 | 1.338(15) |
| Nb4 - Ag5   | 2.935(3)  | C4_1 - F7_1 | 1.339(15) |
| O4 - C4     | 1.12(3)   | C4_1 - F9_1 | 1.340(15) |
| Ag4 - C12   | 2.58(2)   | O1_2 - C1_2 | 1.36(2)   |
| Ag4 - C11   | 2.63(3)   | C1_2 - C3_2 | 1.487(17) |
| Ag4 - C17   | 2.63(2)   | C1_2 - C4_2 | 1.493(17) |
| Ag4 - C13   | 2.70(3)   | C1_2 - C2_2 | 1.497(17) |
| Ag4 - Ag6   | 2.813(2)  | C2_2 - F2_2 | 1.330(14) |
| Ag4 - Ag5   | 2.948(2)  | C2_2 - F3_2 | 1.335(15) |
| Nb5 - C30   | 2.12(3)   | C2_2 - F1_2 | 1.346(15) |
| Nb5 - C25   | 2.13(3)   | C3_2 - F6_2 | 1.331(15) |
| Nb5 - C26   | 2.14(3)   | C3_2 - F5_2 | 1.335(14) |
| Nb5 - C28   | 2.14(4)   | C3_2 - F4_2 | 1.336(15) |
| Nb5 - C29   | 2.17(3)   | C4_2 - F7_2 | 1.321(15) |
| Nb5 - C27   | 2.21(3)   | C4_2 - F8_2 | 1.329(15) |
| Nb5 - Ag6   | 2.952(2)  | C4_2 - F9_2 | 1.342(15) |
| O5 - C5     | 1.15(3)   | O1_3 - C1_3 | 1.363(19) |
| Ag5 - C7    | 2.57(2)   | C1_3 - C2_3 | 1.488(17) |
| Ag5 - C12   | 2.61(2)   | C1_3 - C3_3 | 1.490(17) |
| Ag5 - C24   | 2.61(2)   | C1_3 - C4_3 | 1.505(17) |
| Ag5 - C19   | 2.68(2)   | C2_3 - F3_3 | 1.329(14) |
| Ag5 - Ag6   | 2.878(2)  | C2_3 - F2_3 | 1.341(14) |
| O6 - C6     | 1.16(3)   | C2_3 - F1_3 | 1.347(14) |
| Ag6 - C26   | 2.57(2)   | C3_3 - F4_3 | 1.326(14) |
| Ag6 - C7    | 2.67(2)   | C3_3 - F6_3 | 1.330(14) |
| Ag6 - C11   | 2.68(2)   | C3_3 - F5_3 | 1.345(14) |
| O7 - C7     | 1.19(3)   | C4_3 - F9_3 | 1.332(14) |
| C8 - O8     | 1.17(3)   | C4_3 - F8_3 | 1.333(14) |
| O9 - C9     | 1.16(3)   | C4_3 - F7_3 | 1.343(14) |
| O11 - C11   | 1.15(3)   | O1_4 - C1_4 | 1.351(19) |
| O10 - C10   | 1.10(3)   | C1_4 - C2_4 | 1.487(17) |
| C12 - O12   | 1.21(3)   | C1_4 - C3_4 | 1.490(17) |
| C13 - O13   | 1.15(4)   | C1_4 - C4_4 | 1.501(17) |
| C14 - O14   | 1.20(4)   | C2_4 - F1_4 | 1.327(14) |
| C15 - O15   | 1.13(3)   | C2_4 - F3_4 | 1.330(14) |
| C16 - O16   | 1.24(3)   | C2_4 - F2_4 | 1.332(14) |
| C18 - O18   | 1.17(4)   | C3_4 - F5_4 | 1.333(14) |
| O17 - C17   | 1.15(3)   | C3_4 - F6_4 | 1.334(14) |
| C19 - O19   | 1.16(3)   | C3_4 - F4_4 | 1.338(14) |
| C20 - O20   | 1.11(2)   | C4_4 - F8_4 | 1.326(14) |
| C21 - O21   | 1.13(2)   | C4_4 - F7_4 | 1.327(14) |
| C22 - O22   | 1.15(3)   | C4_4 - F9_4 | 1.333(14) |
| C24 - O24   | 1.20(3)   | F1_5 - C1_5 | 1.359(16) |
| C23 - O23   | 1.17(3)   | F2_5 - C2_5 | 1.345(15) |
| C25 - O25   | 1.15(3)   | F3_5 - C3_5 | 1.343(16) |
| C30 - O30   | 1.18(3)   | F4_5 - C4_5 | 1.353(16) |
| C29 - O29   | 1.13(3)   | C1_5 - C2_5 | 1.356(15) |
| C28 - O28   | 1.15(3)   | C1_5 - C6_5 | 1.360(15) |
| C27 - O27   | 1.10(3)   | C2_5 - C3_5 | 1.358(14) |
| C26 - O26   | 1.14(3)   | C3_5 - C4_5 | 1.356(15) |
| O1_1 - C1_1 | 1.37(2)   | C4_5 - C5_5 | 1.356(15) |
| C1_1 - C2_1 | 1.490(17) | C5_5 - C6_5 | 1.360(15) |
| C1_1 - C4_1 | 1.496(17) | F1_6 - C1_6 | 1.350(15) |
| C1_1 - C3_1 | 1.498(17) | F2_6 - C2_6 | 1.341(15) |
| C2_1 - F3_1 | 1.332(14) | F3_6 - C3_6 | 1.342(16) |
| C2_1 - F2_1 | 1.334(14) | F4_6 - C4_6 | 1.340(16) |
| C2_1 - F1_1 | 1.334(14) | C1_6 - C2_6 | 1.346(14) |
| C3_1 - F4_1 | 1.331(15) | C1_6 - C6_6 | 1.366(15) |
| C3_1 - F5_1 | 1.340(15) | C2_6 - C3_6 | 1.348(14) |
| C3_1 - F6_1 | 1.342(15) | C3_6 - C4_6 | 1.359(15) |

|                           |                  |                   |           |
|---------------------------|------------------|-------------------|-----------|
| C4_6 - C5_6               | 1.355(15)        | Nb3 - Ag1 - Nb1   | 143.89(9) |
| C5_6 - C6_6               | 1.364(15)        | C2 - Nb1 - C6     | 79.4(18)  |
| O1_7 - C1_7               | 1.37(2)          | C2 - Nb1 - C5     | 168.6(12) |
| C1_7 - C3_7               | 1.489(18)        | C6 - Nb1 - C5     | 105.9(12) |
| C1_7 - C2_7               | 1.494(18)        | C2 - Nb1 - C3     | 89.5(16)  |
| C1_7 - C4_7               | 1.503(18)        | C6 - Nb1 - C3     | 156.8(11) |
| C2_7 - F3_7               | 1.328(15)        | C5 - Nb1 - C3     | 81.9(11)  |
| C2_7 - F2_7               | 1.332(15)        | C2 - Nb1 - C4     | 90.4(13)  |
| C2_7 - F1_7               | 1.347(15)        | C6 - Nb1 - C4     | 76.9(10)  |
| C3_7 - F5_7               | 1.336(15)        | C5 - Nb1 - C4     | 81.2(9)   |
| C3_7 - F4_7               | 1.336(15)        | C3 - Nb1 - C4     | 82.9(10)  |
| C3_7 - F6_7               | 1.340(15)        | C2 - Nb1 - C1     | 73.6(16)  |
| C4_7 - F7_7               | 1.334(15)        | C6 - Nb1 - C1     | 116.7(10) |
| C4_7 - F9_7               | 1.336(15)        | C5 - Nb1 - C1     | 111.6(10) |
| C4_7 - F8_7               | 1.342(15)        | C3 - Nb1 - C1     | 78.7(9)   |
| O1_8 - C1_8               | 1.36(2)          | C4 - Nb1 - C1     | 155.5(10) |
| C1_8 - C4_8               | 1.488(18)        | C2 - Nb1 - Ag3    | 129.9(12) |
| C1_8 - C2_8               | 1.496(18)        | C6 - Nb1 - Ag3    | 106.5(7)  |
| C1_8 - C3_8               | 1.498(18)        | C5 - Nb1 - Ag3    | 58.9(7)   |
| C2_8 - F3_8               | 1.335(15)        | C3 - Nb1 - Ag3    | 96.2(9)   |
| C2_8 - F2_8               | 1.336(15)        | C4 - Nb1 - Ag3    | 139.7(7)  |
| C2_8 - F1_8               | 1.339(15)        | C1 - Nb1 - Ag3    | 59.1(7)   |
| C3_8 - F6_8               | 1.330(15)        | C2 - Nb1 - Ag2    | 83.6(10)  |
| C3_8 - F4_8               | 1.333(15)        | C6 - Nb1 - Ag2    | 61.6(7)   |
| C3_8 - F5_8               | 1.336(15)        | C5 - Nb1 - Ag2    | 107.7(7)  |
| C4_8 - F7_8               | 1.331(15)        | C3 - Nb1 - Ag2    | 137.8(7)  |
| C4_8 - F9_8               | 1.338(15)        | C4 - Nb1 - Ag2    | 138.5(7)  |
| C4_8 - F8_8               | 1.340(15)        | C1 - Nb1 - Ag2    | 59.4(6)   |
| F1_9 - C1_9               | 1.368(17)        | Ag3 - Nb1 - Ag2   | 59.47(6)  |
| F2_9 - C2_9               | 1.345(17)        | C2 - Nb1 - Ag1    | 129.3(14) |
| F3_9 - C3_9               | 1.356(17)        | C6 - Nb1 - Ag1    | 55.9(8)   |
| F4_9 - C4_9               | 1.357(17)        | C5 - Nb1 - Ag1    | 60.4(7)   |
| C1_9 - C6_9               | 1.357(16)        | C3 - Nb1 - Ag1    | 140.7(9)  |
| C1_9 - C2_9               | 1.364(15)        | C4 - Nb1 - Ag1    | 100.5(8)  |
| C2_9 - C3_9               | 1.352(15)        | C1 - Nb1 - Ag1    | 104.0(6)  |
| C3_9 - C4_9               | 1.364(15)        | Ag3 - Nb1 - Ag1   | 56.24(6)  |
| C4_9 - C5_9               | 1.355(15)        | Ag2 - Nb1 - Ag1   | 55.91(5)  |
| C5_9 - C6_9               | 1.356(16)        | O1_4 - Al1 - O1_2 | 108.2(16) |
| <b>Atom - Atom - Atom</b> | <b>Angle [°]</b> | O1_4 - Al1 - O1_8 | 105(2)    |
| C6 - Ag1 - C18            | 93.3(13)         | O1_4 - Al1 - O1_1 | 112.2(16) |
| C6 - Ag1 - Ag4            | 135.8(5)         | O1_2 - Al1 - O1_1 | 109.7(17) |
| C18 - Ag1 - Ag4           | 101.7(10)        | O1_4 - Al1 - O1_3 | 112.3(13) |
| C6 - Ag1 - Ag2            | 59.5(7)          | O1_2 - Al1 - O1_3 | 101.2(16) |
| C18 - Ag1 - Ag2           | 151.5(11)        | O1_8 - Al1 - O1_3 | 104.0(19) |
| Ag4 - Ag1 - Ag2           | 93.79(6)         | O1_1 - Al1 - O1_3 | 112.6(15) |
| C6 - Ag1 - Ag3            | 97.0(8)          | O1_4 - Al1 - O1_7 | 110(2)    |
| C18 - Ag1 - Ag3           | 135.9(8)         | O1_8 - Al1 - O1_7 | 120(3)    |
| Ag4 - Ag1 - Ag3           | 100.14(7)        | O1_3 - Al1 - O1_7 | 105.9(19) |
| Ag2 - Ag1 - Ag3           | 62.28(6)         | O1 - C1 - Nb1     | 170(2)    |
| C6 - Ag1 - Nb3            | 108.4(8)         | O1 - C1 - Ag3     | 113(2)    |
| C18 - Ag1 - Nb3           | 45.1(8)          | Nb1 - C1 - Ag3    | 74.9(9)   |
| Ag4 - Ag1 - Nb3           | 61.03(6)         | O1 - C1 - Ag2     | 112.4(18) |
| Ag2 - Ag1 - Nb3           | 131.13(7)        | Nb1 - C1 - Ag2    | 75.1(10)  |
| Ag3 - Ag1 - Nb3           | 154.56(10)       | Ag3 - C1 - Ag2    | 67.7(6)   |
| C6 - Ag1 - Nb1            | 41.9(7)          | C23 - Ag2 - C1    | 129.6(8)  |
| C18 - Ag1 - Nb1           | 106.4(10)        | C23 - Ag2 - C19   | 89.4(8)   |
| Ag4 - Ag1 - Nb1           | 151.79(7)        | C1 - Ag2 - C19    | 87.2(9)   |
| Ag2 - Ag1 - Nb1           | 60.17(6)         | C23 - Ag2 - C6    | 89.1(8)   |
| Ag3 - Ag1 - Nb1           | 59.63(6)         | C1 - Ag2 - C6     | 85.8(10)  |
|                           |                  | C19 - Ag2 - C6    | 169.5(9)  |

|                 |           |                 |           |
|-----------------|-----------|-----------------|-----------|
| C23 - Ag2 - Ag1 | 118.0(5)  | C7 - Nb2 - Ag6  | 59.1(6)   |
| C1 - Ag2 - Ag1  | 99.5(7)   | C8 - Nb2 - Ag6  | 135.2(6)  |
| C19 - Ag2 - Ag1 | 133.8(6)  | C11 - Nb2 - Ag6 | 58.7(6)   |
| C6 - Ag2 - Ag1  | 55.4(7)   | C9 - Nb2 - Ag6  | 97.8(6)   |
| C23 - Ag2 - Ag5 | 80.3(5)   | C10 - Nb2 - Ag6 | 138.3(7)  |
| C1 - Ag2 - Ag5  | 136.0(7)  | Ag4 - Nb2 - Ag6 | 55.72(5)  |
| C19 - Ag2 - Ag5 | 58.3(5)   | Ag5 - Nb2 - Ag6 | 56.80(5)  |
| C6 - Ag2 - Ag5  | 131.5(7)  | C13 - Nb3 - C16 | 160.1(12) |
| Ag1 - Ag2 - Ag5 | 88.57(7)  | C13 - Nb3 - C14 | 78.7(18)  |
| C23 - Ag2 - Nb4 | 44.9(5)   | C16 - Nb3 - C14 | 82.1(18)  |
| C1 - Ag2 - Nb4  | 113.6(7)  | C13 - Nb3 - C17 | 123.6(10) |
| C19 - Ag2 - Nb4 | 44.5(6)   | C16 - Nb3 - C17 | 76.3(11)  |
| C6 - Ag2 - Nb4  | 132.9(6)  | C14 - Nb3 - C17 | 152.6(15) |
| Ag1 - Ag2 - Nb4 | 145.63(7) | C13 - Nb3 - C18 | 87.8(15)  |
| Ag5 - Ag2 - Nb4 | 61.57(6)  | C16 - Nb3 - C18 | 85.3(14)  |
| C23 - Ag2 - Ag3 | 174.6(5)  | C14 - Nb3 - C18 | 84.3(13)  |
| C1 - Ag2 - Ag3  | 55.7(6)   | C17 - Nb3 - C18 | 110.0(12) |
| C19 - Ag2 - Ag3 | 90.3(6)   | C13 - Nb3 - C15 | 87.7(12)  |
| C6 - Ag2 - Ag3  | 92.1(6)   | C16 - Nb3 - C15 | 95.3(10)  |
| Ag1 - Ag2 - Ag3 | 58.96(6)  | C14 - Nb3 - C15 | 83.9(12)  |
| Ag5 - Ag2 - Ag3 | 94.93(7)  | C17 - Nb3 - C15 | 81.7(9)   |
| Nb4 - Ag2 - Ag3 | 134.67(7) | C18 - Nb3 - C15 | 168.0(11) |
| C23 - Ag2 - Nb1 | 123.7(5)  | C13 - Nb3 - Ag1 | 85.0(8)   |
| C1 - Ag2 - Nb1  | 45.5(8)   | C16 - Nb3 - Ag1 | 107.0(8)  |
| C19 - Ag2 - Nb1 | 132.2(5)  | C14 - Nb3 - Ag1 | 140.4(10) |
| C6 - Ag2 - Nb1  | 42.6(6)   | C17 - Nb3 - Ag1 | 63.6(6)   |
| Ag1 - Ag2 - Nb1 | 63.92(6)  | C18 - Nb3 - Ag1 | 59.0(7)   |
| Ag5 - Ag2 - Nb1 | 149.22(8) | C15 - Nb3 - Ag1 | 131.6(6)  |
| Nb4 - Ag2 - Nb1 | 148.73(8) | C13 - Nb3 - Ag4 | 63.0(8)   |
| Ag3 - Ag2 - Nb1 | 59.90(6)  | C16 - Nb3 - Ag4 | 136.8(9)  |
| O2 - C2 - Nb1   | 174(6)    | C14 - Nb3 - Ag4 | 137.0(16) |
| C12 - Nb2 - C7  | 111.1(9)  | C17 - Nb3 - Ag4 | 60.7(6)   |
| C12 - Nb2 - C8  | 78.7(9)   | C18 - Nb3 - Ag4 | 111.5(8)  |
| C7 - Nb2 - C8   | 78.1(9)   | C15 - Nb3 - Ag4 | 76.1(7)   |
| C12 - Nb2 - C11 | 111.8(9)  | Ag1 - Nb3 - Ag4 | 58.04(6)  |
| C7 - Nb2 - C11  | 109.9(9)  | O3 - C3 - Nb1   | 174(3)    |
| C8 - Nb2 - C11  | 161.8(9)  | C25 - Ag3 - C5  | 137.3(8)  |
| C12 - Nb2 - C9  | 158.6(9)  | C25 - Ag3 - C1  | 94.8(11)  |
| C7 - Nb2 - C9   | 80.4(9)   | C5 - Ag3 - C1   | 86.2(10)  |
| C8 - Nb2 - C9   | 86.5(9)   | C25 - Ag3 - Ag6 | 78.9(5)   |
| C11 - Nb2 - C9  | 79.0(9)   | C5 - Ag3 - Ag6  | 130.7(7)  |
| C12 - Nb2 - C10 | 78.6(12)  | C1 - Ag3 - Ag6  | 130.5(5)  |
| C7 - Nb2 - C10  | 159.4(11) | C25 - Ag3 - Ag1 | 158.2(5)  |
| C8 - Nb2 - C10  | 86.5(9)   | C5 - Ag3 - Ag1  | 60.3(6)   |
| C11 - Nb2 - C10 | 81.4(9)   | C1 - Ag3 - Ag1  | 100.0(8)  |
| C9 - Nb2 - C10  | 85.2(12)  | Ag6 - Ag3 - Ag1 | 79.23(6)  |
| C12 - Nb2 - Ag4 | 58.7(6)   | C25 - Ag3 - Nb5 | 45.3(7)   |
| C7 - Nb2 - Ag4  | 105.7(6)  | C5 - Ag3 - Nb5  | 114.5(7)  |
| C8 - Nb2 - Ag4  | 135.9(6)  | C1 - Ag3 - Nb5  | 138.6(8)  |
| C11 - Nb2 - Ag4 | 59.2(7)   | Ag6 - Ag3 - Nb5 | 62.75(6)  |
| C9 - Nb2 - Ag4  | 137.6(6)  | Ag1 - Ag3 - Nb5 | 121.45(8) |
| C10 - Nb2 - Ag4 | 94.9(9)   | C25 - Ag3 - Ag2 | 119.3(6)  |
| C12 - Nb2 - Ag5 | 58.9(7)   | C5 - Ag3 - Ag2  | 96.7(7)   |
| C7 - Nb2 - Ag5  | 57.6(6)   | C1 - Ag3 - Ag2  | 56.5(6)   |
| C8 - Nb2 - Ag5  | 90.6(6)   | Ag6 - Ag3 - Ag2 | 83.77(6)  |
| C11 - Nb2 - Ag5 | 107.5(6)  | Ag1 - Ag3 - Ag2 | 58.76(5)  |
| C9 - Nb2 - Ag5  | 137.4(7)  | Nb5 - Ag3 - Ag2 | 144.11(7) |
| C10 - Nb2 - Ag5 | 137.1(10) | C25 - Ag3 - Nb1 | 136.2(6)  |
| Ag4 - Nb2 - Ag5 | 59.32(6)  | C5 - Ag3 - Nb1  | 44.3(7)   |
| C12 - Nb2 - Ag6 | 103.6(7)  | C1 - Ag3 - Nb1  | 45.9(8)   |

|                 |           |                 |           |
|-----------------|-----------|-----------------|-----------|
| Ag6 - Ag3 - Nb1 | 138.11(8) | Nb3 - Ag4 - Ag5 | 128.54(9) |
| Ag1 - Ag3 - Nb1 | 64.13(7)  | C12 - Ag4 - Nb2 | 42.1(6)   |
| Nb5 - Ag3 - Nb1 | 155.20(7) | C11 - Ag4 - Nb2 | 45.3(6)   |
| Ag2 - Ag3 - Nb1 | 60.63(6)  | C17 - Ag4 - Nb2 | 133.5(6)  |
| C24 - Nb4 - C19 | 108.6(9)  | C13 - Ag4 - Nb2 | 133.1(10) |
| C24 - Nb4 - C23 | 90.9(8)   | Ag6 - Ag4 - Nb2 | 63.85(6)  |
| C19 - Nb4 - C23 | 122.3(8)  | Ag1 - Ag4 - Nb2 | 138.87(7) |
| C24 - Nb4 - C20 | 83.0(8)   | Nb3 - Ag4 - Nb2 | 159.70(8) |
| C19 - Nb4 - C20 | 79.2(8)   | Ag5 - Ag4 - Nb2 | 60.91(6)  |
| C23 - Nb4 - C20 | 158.3(8)  | C30 - Nb5 - C25 | 124.9(9)  |
| C24 - Nb4 - C21 | 168.8(8)  | C30 - Nb5 - C26 | 103.5(9)  |
| C19 - Nb4 - C21 | 80.6(9)   | C25 - Nb5 - C26 | 93.4(9)   |
| C23 - Nb4 - C21 | 89.3(8)   | C30 - Nb5 - C28 | 76.2(9)   |
| C20 - Nb4 - C21 | 92.7(8)   | C25 - Nb5 - C28 | 158.6(10) |
| C24 - Nb4 - C22 | 87.9(9)   | C26 - Nb5 - C28 | 83.8(13)  |
| C19 - Nb4 - C22 | 150.1(9)  | C30 - Nb5 - C29 | 85.4(10)  |
| C23 - Nb4 - C22 | 80.7(9)   | C25 - Nb5 - C29 | 88.1(10)  |
| C20 - Nb4 - C22 | 78.3(9)   | C26 - Nb5 - C29 | 167.8(9)  |
| C21 - Nb4 - C22 | 81.0(9)   | C28 - Nb5 - C29 | 90.4(14)  |
| C24 - Nb4 - Ag2 | 111.8(5)  | C30 - Nb5 - C27 | 157.7(10) |
| C19 - Nb4 - Ag2 | 61.5(5)   | C25 - Nb5 - C27 | 75.9(11)  |
| C23 - Nb4 - Ag2 | 60.9(6)   | C26 - Nb5 - C27 | 81.0(9)   |
| C20 - Nb4 - Ag2 | 140.5(6)  | C28 - Nb5 - C27 | 82.7(11)  |
| C21 - Nb4 - Ag2 | 78.0(6)   | C29 - Nb5 - C27 | 87.6(10)  |
| C22 - Nb4 - Ag2 | 136.0(7)  | C30 - Nb5 - Ag3 | 65.3(6)   |
| C24 - Nb4 - Ag5 | 59.9(5)   | C25 - Nb5 - Ag3 | 59.7(7)   |
| C19 - Nb4 - Ag5 | 61.5(5)   | C26 - Nb5 - Ag3 | 111.3(6)  |
| C23 - Nb4 - Ag5 | 86.8(6)   | C28 - Nb5 - Ag3 | 140.8(7)  |
| C20 - Nb4 - Ag5 | 107.6(6)  | C29 - Nb5 - Ag3 | 79.8(7)   |
| C21 - Nb4 - Ag5 | 131.3(6)  | C27 - Nb5 - Ag3 | 134.0(9)  |
| C22 - Nb4 - Ag5 | 145.3(7)  | C30 - Nb5 - Ag6 | 64.6(6)   |
| Ag2 - Nb4 - Ag5 | 58.07(5)  | C25 - Nb5 - Ag6 | 82.7(6)   |
| O4 - C4 - Nb1   | 177(3)    | C26 - Nb5 - Ag6 | 58.1(6)   |
| C12 - Ag4 - C11 | 83.8(9)   | C28 - Nb5 - Ag6 | 113.1(11) |
| C12 - Ag4 - C17 | 93.0(8)   | C29 - Nb5 - Ag6 | 134.1(7)  |
| C11 - Ag4 - C17 | 172.8(7)  | C27 - Nb5 - Ag6 | 132.3(7)  |
| C12 - Ag4 - C13 | 140.4(8)  | Ag3 - Nb5 - Ag6 | 56.71(6)  |
| C11 - Ag4 - C13 | 91.3(11)  | O5 - C5 - Nb1   | 169(2)    |
| C17 - Ag4 - C13 | 87.1(11)  | O5 - C5 - Ag3   | 110.7(17) |
| C12 - Ag4 - Ag6 | 97.1(5)   | Nb1 - C5 - Ag3  | 76.8(10)  |
| C11 - Ag4 - Ag6 | 58.8(5)   | C7 - Ag5 - C12  | 81.1(9)   |
| C17 - Ag4 - Ag6 | 128.1(5)  | C7 - Ag5 - C24  | 109.1(7)  |
| C13 - Ag4 - Ag6 | 113.8(6)  | C12 - Ag5 - C24 | 93.6(8)   |
| C12 - Ag4 - Ag1 | 136.2(6)  | C7 - Ag5 - C19  | 87.3(9)   |
| C11 - Ag4 - Ag1 | 126.4(6)  | C12 - Ag5 - C19 | 164.4(7)  |
| C17 - Ag4 - Ag1 | 59.9(5)   | C24 - Ag5 - C19 | 80.4(8)   |
| C13 - Ag4 - Ag1 | 76.5(9)   | C7 - Ag5 - Ag2  | 129.9(6)  |
| Ag6 - Ag4 - Ag1 | 78.76(6)  | C12 - Ag5 - Ag2 | 138.0(5)  |
| C12 - Ag4 - Nb3 | 123.8(6)  | C24 - Ag5 - Ag2 | 99.5(6)   |
| C11 - Ag4 - Nb3 | 133.7(6)  | C19 - Ag5 - Ag2 | 57.5(5)   |
| C17 - Ag4 - Nb3 | 44.1(6)   | C7 - Ag5 - Ag6  | 58.3(5)   |
| C13 - Ag4 - Nb3 | 43.0(9)   | C12 - Ag5 - Ag6 | 94.8(5)   |
| Ag6 - Ag4 - Nb3 | 135.89(8) | C24 - Ag5 - Ag6 | 163.4(5)  |
| Ag1 - Ag4 - Nb3 | 60.93(6)  | C19 - Ag5 - Ag6 | 87.8(6)   |
| C12 - Ag4 - Ag5 | 55.8(5)   | Ag2 - Ag5 - Ag6 | 83.68(6)  |
| C11 - Ag4 - Ag5 | 97.5(6)   | C7 - Ag5 - Nb4  | 119.0(6)  |
| C17 - Ag4 - Ag5 | 86.0(5)   | C12 - Ag5 - Nb4 | 135.6(5)  |
| C13 - Ag4 - Ag5 | 162.8(8)  | C24 - Ag5 - Nb4 | 43.8(7)   |
| Ag6 - Ag4 - Ag5 | 59.89(5)  | C19 - Ag5 - Nb4 | 44.0(6)   |
| Ag1 - Ag4 - Ag5 | 86.40(6)  | Ag2 - Ag5 - Nb4 | 60.36(6)  |

|                 |           |                    |           |
|-----------------|-----------|--------------------|-----------|
| Ag6 - Ag5 - Nb4 | 129.53(7) | Nb2 - C11 - Ag4    | 75.5(9)   |
| C7 - Ag5 - Ag4  | 93.8(6)   | O11 - C11 - Ag6    | 110.9(17) |
| C12 - Ag5 - Ag4 | 54.8(4)   | Nb2 - C11 - Ag6    | 77.4(8)   |
| C24 - Ag5 - Ag4 | 138.0(6)  | Ag4 - C11 - Ag6    | 64.1(6)   |
| C19 - Ag5 - Ag4 | 137.0(4)  | O10 - C10 - Nb2    | 179(3)    |
| Ag2 - Ag5 - Ag4 | 91.11(6)  | O12 - C12 - Nb2    | 169(2)    |
| Ag6 - Ag5 - Ag4 | 57.74(5)  | O12 - C12 - Ag4    | 110.9(17) |
| Nb4 - Ag5 - Ag4 | 145.45(7) | Nb2 - C12 - Ag4    | 79.2(7)   |
| C7 - Ag5 - Nb2  | 42.5(6)   | O12 - C12 - Ag5    | 108.7(18) |
| C12 - Ag5 - Nb2 | 41.6(6)   | Nb2 - C12 - Ag5    | 79.5(8)   |
| C24 - Ag5 - Nb2 | 116.9(6)  | Ag4 - C12 - Ag5    | 69.3(6)   |
| C19 - Ag5 - Nb2 | 129.4(6)  | O13 - C13 - Nb3    | 170(3)    |
| Ag2 - Ag5 - Nb2 | 143.44(7) | O13 - C13 - Ag4    | 113(3)    |
| Ag6 - Ag5 - Nb2 | 62.68(6)  | Nb3 - C13 - Ag4    | 74.0(8)   |
| Nb4 - Ag5 - Nb2 | 153.95(7) | O14 - C14 - Nb3    | 164(5)    |
| Ag4 - Ag5 - Nb2 | 59.77(6)  | O15 - C15 - Nb3    | 174(2)    |
| O6 - C6 - Nb1   | 167(3)    | O16 - C16 - Nb3    | 174(3)    |
| O6 - C6 - Ag1   | 110(2)    | O18 - C18 - Nb3    | 172(3)    |
| Nb1 - C6 - Ag1  | 82.1(9)   | O18 - C18 - Ag1    | 111(2)    |
| O6 - C6 - Ag2   | 111.1(17) | Nb3 - C18 - Ag1    | 75.8(10)  |
| Nb1 - C6 - Ag2  | 75.8(9)   | O17 - C17 - Nb3    | 172.0(17) |
| Ag1 - C6 - Ag2  | 65.1(6)   | O17 - C17 - Ag4    | 110.7(16) |
| C26 - Ag6 - C7  | 87.9(8)   | Nb3 - C17 - Ag4    | 75.2(8)   |
| C26 - Ag6 - C11 | 86.2(9)   | O19 - C19 - Nb4    | 170.5(18) |
| C7 - Ag6 - C11  | 80.8(8)   | O19 - C19 - Ag2    | 110.7(14) |
| C26 - Ag6 - Ag3 | 102.5(6)  | Nb4 - C19 - Ag2    | 74.0(8)   |
| C7 - Ag6 - Ag3  | 135.1(6)  | O19 - C19 - Ag5    | 114.9(17) |
| C11 - Ag6 - Ag3 | 142.5(5)  | Nb4 - C19 - Ag5    | 74.5(7)   |
| C26 - Ag6 - Ag4 | 142.0(6)  | Ag2 - C19 - Ag5    | 64.2(5)   |
| C7 - Ag6 - Ag4  | 94.9(6)   | O20 - C20 - Nb4    | 177.2(19) |
| C11 - Ag6 - Ag4 | 57.1(6)   | O21 - C21 - Nb4    | 178.5(19) |
| Ag3 - Ag6 - Ag4 | 101.87(7) | O22 - C22 - Nb4    | 177(2)    |
| C26 - Ag6 - Ag5 | 141.0(5)  | O24 - C24 - Nb4    | 173.8(17) |
| C7 - Ag6 - Ag5  | 55.0(5)   | O24 - C24 - Ag5    | 109.8(17) |
| C11 - Ag6 - Ag5 | 98.0(6)   | Nb4 - C24 - Ag5    | 76.4(7)   |
| Ag3 - Ag6 - Ag5 | 97.32(7)  | O23 - C23 - Nb4    | 170.8(19) |
| Ag4 - Ag6 - Ag5 | 62.37(5)  | O23 - C23 - Ag2    | 114.7(16) |
| C26 - Ag6 - Nb5 | 44.8(6)   | Nb4 - C23 - Ag2    | 74.2(7)   |
| C7 - Ag6 - Nb5  | 128.3(6)  | O25 - C25 - Nb5    | 172(2)    |
| C11 - Ag6 - Nb5 | 109.6(6)  | O25 - C25 - Ag3    | 112(2)    |
| Ag3 - Ag6 - Nb5 | 60.54(6)  | Nb5 - C25 - Ag3    | 75.0(7)   |
| Ag4 - Ag6 - Nb5 | 134.13(7) | O30 - C30 - Nb5    | 169.3(18) |
| Ag5 - Ag6 - Nb5 | 152.41(8) | O29 - C29 - Nb5    | 176(2)    |
| C26 - Ag6 - Nb2 | 101.3(6)  | O28 - C28 - Nb5    | 165(4)    |
| C7 - Ag6 - Nb2  | 41.4(6)   | O27 - C27 - Nb5    | 173(3)    |
| C11 - Ag6 - Nb2 | 43.9(6)   | O26 - C26 - Nb5    | 172.9(19) |
| Ag3 - Ag6 - Nb2 | 155.74(8) | O26 - C26 - Ag6    | 109.2(17) |
| Ag4 - Ag6 - Nb2 | 60.43(6)  | Nb5 - C26 - Ag6    | 77.0(8)   |
| Ag5 - Ag6 - Nb2 | 60.53(6)  | C1_1 - O1_1 - Al1  | 166(3)    |
| Nb5 - Ag6 - Nb2 | 143.58(8) | O1_1 - C1_1 - C2_1 | 109.2(16) |
| O7 - C7 - Nb2   | 166.6(19) | O1_1 - C1_1 - C4_1 | 108.2(16) |
| O7 - C7 - Ag5   | 112.8(17) | C2_1 - C1_1 - C4_1 | 111.0(14) |
| Nb2 - C7 - Ag5  | 79.9(8)   | O1_1 - C1_1 - C3_1 | 110.9(16) |
| O7 - C7 - Ag6   | 108.8(16) | C2_1 - C1_1 - C3_1 | 108.3(13) |
| Nb2 - C7 - Ag6  | 79.5(8)   | C4_1 - C1_1 - C3_1 | 109.3(14) |
| Ag5 - C7 - Ag6  | 66.7(5)   | F3_1 - C2_1 - F2_1 | 104.4(18) |
| O8 - C8 - Nb2   | 179(2)    | F3_1 - C2_1 - F1_1 | 107.9(19) |
| O9 - C9 - Nb2   | 175(2)    | F2_1 - C2_1 - F1_1 | 108.3(19) |
| O11 - C11 - Nb2 | 167(2)    | F3_1 - C2_1 - C1_1 | 110.2(17) |
| O11 - C11 - Ag4 | 116.9(19) | F2_1 - C2_1 - C1_1 | 114.1(17) |

|                    |           |                    |           |
|--------------------|-----------|--------------------|-----------|
| F1_1 - C2_1 - C1_1 | 111.5(17) | F9_3 - C4_3 - C1_3 | 109.2(17) |
| F4_1 - C3_1 - F5_1 | 105.7(19) | F8_3 - C4_3 - C1_3 | 111.2(16) |
| F4_1 - C3_1 - F6_1 | 108.5(18) | F7_3 - C4_3 - C1_3 | 109.3(17) |
| F5_1 - C3_1 - F6_1 | 105.7(18) | C1_4 - O1_4 - A11  | 176(2)    |
| F4_1 - C3_1 - C1_1 | 111.7(17) | O1_4 - C1_4 - C2_4 | 107.2(14) |
| F5_1 - C3_1 - C1_1 | 112.3(18) | O1_4 - C1_4 - C3_4 | 109.2(15) |
| F6_1 - C3_1 - C1_1 | 112.6(17) | C2_4 - C1_4 - C3_4 | 111.2(13) |
| F8_1 - C4_1 - F7_1 | 108.2(19) | O1_4 - C1_4 - C4_4 | 109.5(15) |
| F8_1 - C4_1 - F9_1 | 106.0(19) | C2_4 - C1_4 - C4_4 | 109.9(13) |
| F7_1 - C4_1 - F9_1 | 107(2)    | C3_4 - C1_4 - C4_4 | 109.9(13) |
| F8_1 - C4_1 - C1_1 | 110.9(18) | F1_4 - C2_4 - F3_4 | 106.5(16) |
| F7_1 - C4_1 - C1_1 | 112.8(19) | F1_4 - C2_4 - F2_4 | 105.5(15) |
| F9_1 - C4_1 - C1_1 | 111.6(18) | F3_4 - C2_4 - F2_4 | 106.2(15) |
| C1_2 - O1_2 - A11  | 177(3)    | F1_4 - C2_4 - C1_4 | 111.4(15) |
| O1_2 - C1_2 - C3_2 | 107.6(16) | F3_4 - C2_4 - C1_4 | 113.0(15) |
| O1_2 - C1_2 - C4_2 | 107.1(16) | F2_4 - C2_4 - C1_4 | 113.6(15) |
| C3_2 - C1_2 - C4_2 | 112.1(14) | F5_4 - C3_4 - F6_4 | 105.8(18) |
| O1_2 - C1_2 - C2_2 | 109.7(16) | F5_4 - C3_4 - F4_4 | 109.3(19) |
| C3_2 - C1_2 - C2_2 | 112.3(15) | F6_4 - C3_4 - F4_4 | 106.2(17) |
| C4_2 - C1_2 - C2_2 | 107.9(14) | F5_4 - C3_4 - C1_4 | 110.8(17) |
| F2_2 - C2_2 - F3_2 | 109.5(19) | F6_4 - C3_4 - C1_4 | 113.7(16) |
| F2_2 - C2_2 - F1_2 | 107.7(19) | F4_4 - C3_4 - C1_4 | 110.7(16) |
| F3_2 - C2_2 - F1_2 | 104.8(18) | F8_4 - C4_4 - F7_4 | 108.4(17) |
| F2_2 - C2_2 - C1_2 | 115.3(19) | F8_4 - C4_4 - F9_4 | 108.0(18) |
| F3_2 - C2_2 - C1_2 | 109.1(17) | F7_4 - C4_4 - F9_4 | 105.8(18) |
| F1_2 - C2_2 - C1_2 | 110.0(18) | F8_4 - C4_4 - C1_4 | 109.9(16) |
| F6_2 - C3_2 - F5_2 | 109.4(19) | F7_4 - C4_4 - C1_4 | 112.4(17) |
| F6_2 - C3_2 - F4_2 | 104.7(19) | F9_4 - C4_4 - C1_4 | 112.2(16) |
| F5_2 - C3_2 - F4_2 | 106.4(19) | C2_5 - C1_5 - F1_5 | 119.1(14) |
| F6_2 - C3_2 - C1_2 | 111.9(18) | C2_5 - C1_5 - C6_5 | 120.2(14) |
| F5_2 - C3_2 - C1_2 | 111.8(18) | F1_5 - C1_5 - C6_5 | 120.8(14) |
| F4_2 - C3_2 - C1_2 | 112.3(18) | F2_5 - C2_5 - C1_5 | 120.3(14) |
| F7_2 - C4_2 - F8_2 | 106.1(19) | F2_5 - C2_5 - C3_5 | 119.6(14) |
| F7_2 - C4_2 - F9_2 | 104.3(18) | C1_5 - C2_5 - C3_5 | 120.1(13) |
| F8_2 - C4_2 - F9_2 | 107.7(19) | F3_5 - C3_5 - C4_5 | 119.7(14) |
| F7_2 - C4_2 - C1_2 | 115.3(18) | F3_5 - C3_5 - C2_5 | 120.5(14) |
| F8_2 - C4_2 - C1_2 | 110.2(17) | C4_5 - C3_5 - C2_5 | 119.8(13) |
| F9_2 - C4_2 - C1_2 | 112.6(18) | F4_5 - C4_5 - C3_5 | 119.1(15) |
| C1_3 - O1_3 - A11  | 158.5(18) | F4_5 - C4_5 - C5_5 | 120.9(16) |
| O1_3 - C1_3 - C2_3 | 113.4(15) | C3_5 - C4_5 - C5_5 | 120.1(14) |
| O1_3 - C1_3 - C3_3 | 109.0(15) | C4_5 - C5_5 - C6_5 | 120.3(16) |
| C2_3 - C1_3 - C3_3 | 109.5(13) | C1_5 - C6_5 - C5_5 | 119.5(16) |
| O1_3 - C1_3 - C4_3 | 107.5(14) | C2_6 - C1_6 - F1_6 | 117.9(13) |
| C2_3 - C1_3 - C4_3 | 107.8(13) | C2_6 - C1_6 - C6_6 | 119.6(14) |
| C3_3 - C1_3 - C4_3 | 109.4(14) | F1_6 - C1_6 - C6_6 | 122.5(14) |
| F3_3 - C2_3 - F2_3 | 105.9(16) | F2_6 - C2_6 - C1_6 | 120.2(13) |
| F3_3 - C2_3 - F1_3 | 108.3(18) | F2_6 - C2_6 - C3_6 | 118.6(13) |
| F2_3 - C2_3 - F1_3 | 108.2(17) | C1_6 - C2_6 - C3_6 | 121.2(13) |
| F3_3 - C2_3 - C1_3 | 112.0(16) | F3_6 - C3_6 - C2_6 | 120.2(14) |
| F2_3 - C2_3 - C1_3 | 113.2(15) | F3_6 - C3_6 - C4_6 | 120.0(15) |
| F1_3 - C2_3 - C1_3 | 109.0(16) | C2_6 - C3_6 - C4_6 | 119.7(13) |
| F4_3 - C3_3 - F6_3 | 107.2(18) | F4_6 - C4_6 - C5_6 | 123.7(17) |
| F4_3 - C3_3 - F5_3 | 108.2(18) | F4_6 - C4_6 - C3_6 | 116.5(16) |
| F6_3 - C3_3 - F5_3 | 109.1(18) | C5_6 - C4_6 - C3_6 | 119.7(15) |
| F4_3 - C3_3 - C1_3 | 112.4(17) | C4_6 - C5_6 - C6_6 | 120.4(16) |
| F6_3 - C3_3 - C1_3 | 111.4(16) | C5_6 - C6_6 - C1_6 | 119.3(16) |
| F5_3 - C3_3 - C1_3 | 108.5(16) | C1_7 - O1_7 - A11  | 160(3)    |
| F9_3 - C4_3 - F8_3 | 107.3(17) | O1_7 - C1_7 - C3_7 | 111.2(18) |
| F9_3 - C4_3 - F7_3 | 107.5(19) | O1_7 - C1_7 - C2_7 | 108.6(19) |
| F8_3 - C4_3 - F7_3 | 112.2(19) | C3_7 - C1_7 - C2_7 | 111.5(16) |

|                    |           |
|--------------------|-----------|
| O1_7 - C1_7 - C4_7 | 110.8(19) |
| C3_7 - C1_7 - C4_7 | 109.0(17) |
| C2_7 - C1_7 - C4_7 | 105.6(17) |
| F3_7 - C2_7 - F2_7 | 109(2)    |
| F3_7 - C2_7 - F1_7 | 106(2)    |
| F2_7 - C2_7 - F1_7 | 104(2)    |
| F3_7 - C2_7 - C1_7 | 113(2)    |
| F2_7 - C2_7 - C1_7 | 117(2)    |
| F1_7 - C2_7 - C1_7 | 107(2)    |
| F5_7 - C3_7 - F4_7 | 105(2)    |
| F5_7 - C3_7 - F6_7 | 105(2)    |
| F4_7 - C3_7 - F6_7 | 108(2)    |
| F5_7 - C3_7 - C1_7 | 113(2)    |
| F4_7 - C3_7 - C1_7 | 113(2)    |
| F6_7 - C3_7 - C1_7 | 112.1(19) |
| F7_7 - C4_7 - F9_7 | 109(2)    |
| F7_7 - C4_7 - F8_7 | 107(2)    |
| F9_7 - C4_7 - F8_7 | 106(2)    |
| F7_7 - C4_7 - C1_7 | 114(2)    |
| F9_7 - C4_7 - C1_7 | 111(2)    |
| F8_7 - C4_7 - C1_7 | 110(2)    |
| C1_8 - O1_8 - Al1  | 150(3)    |
| O1_8 - C1_8 - C4_8 | 111(2)    |
| O1_8 - C1_8 - C2_8 | 109(2)    |
| C4_8 - C1_8 - C2_8 | 109.1(17) |
| O1_8 - C1_8 - C3_8 | 106.5(17) |
| C4_8 - C1_8 - C3_8 | 110.8(16) |
| C2_8 - C1_8 - C3_8 | 109.5(16) |
| F3_8 - C2_8 - F2_8 | 107(2)    |
| F3_8 - C2_8 - F1_8 | 108(2)    |
| F2_8 - C2_8 - F1_8 | 107(2)    |
| F3_8 - C2_8 - C1_8 | 109(2)    |
| F2_8 - C2_8 - C1_8 | 113(2)    |
| F1_8 - C2_8 - C1_8 | 112(2)    |
| F6_8 - C3_8 - F4_8 | 107(2)    |
| F6_8 - C3_8 - F5_8 | 110(2)    |
| F4_8 - C3_8 - F5_8 | 108(2)    |
| F6_8 - C3_8 - C1_8 | 110(2)    |
| F4_8 - C3_8 - C1_8 | 113(2)    |
| F5_8 - C3_8 - C1_8 | 108.4(19) |
| F7_8 - C4_8 - F9_8 | 107(2)    |
| F7_8 - C4_8 - F8_8 | 109(2)    |
| F9_8 - C4_8 - F8_8 | 106(2)    |
| F7_8 - C4_8 - C1_8 | 112(2)    |
| F9_8 - C4_8 - C1_8 | 112(2)    |
| F8_8 - C4_8 - C1_8 | 110(2)    |
| C6_9 - C1_9 - C2_9 | 120.7(15) |
| C6_9 - C1_9 - F1_9 | 120.8(17) |
| C2_9 - C1_9 - F1_9 | 118.5(16) |
| F2_9 - C2_9 - C3_9 | 122.5(16) |
| F2_9 - C2_9 - C1_9 | 117.0(15) |
| C3_9 - C2_9 - C1_9 | 120.5(14) |
| C2_9 - C3_9 - F3_9 | 125.7(16) |
| C2_9 - C3_9 - C4_9 | 118.4(14) |
| F3_9 - C3_9 - C4_9 | 115.9(15) |
| C5_9 - C4_9 - F4_9 | 121.3(19) |
| C5_9 - C4_9 - C3_9 | 121.2(15) |
| F4_9 - C4_9 - C3_9 | 117.5(18) |
| C4_9 - C5_9 - C6_9 | 120.1(17) |
| C5_9 - C6_9 - C1_9 | 119.0(18) |

Table 3. Torsion angles for IK\_WU77\_0m-finalcif.cif.

| Atom - Atom - Atom - Atom | Torsion Angle [°] |
|---------------------------|-------------------|
| O1_4 - Al1 - O1_1 - C1_1  | 25(9)             |
| O1_2 - Al1 - O1_1 - C1_1  | -96(9)            |
| O1_3 - Al1 - O1_1 - C1_1  | 153(9)            |
| Al1 - O1_1 - C1_1 - C2_1  | -69(9)            |
| Al1 - O1_1 - C1_1 - C4_1  | 171(8)            |
| Al1 - O1_1 - C1_1 - C3_1  | 51(9)             |
| O1_1 - C1_1 - C2_1 - F3_1 | 80(2)             |
| C4_1 - C1_1 - C2_1 - F3_1 | -160.9(19)        |
| C3_1 - C1_1 - C2_1 - F3_1 | -41(2)            |
| O1_1 - C1_1 - C2_1 - F2_1 | -163(2)           |
| C4_1 - C1_1 - C2_1 - F2_1 | -44(2)            |
| C3_1 - C1_1 - C2_1 - F2_1 | 76(2)             |
| O1_1 - C1_1 - C2_1 - F1_1 | -40(2)            |
| C4_1 - C1_1 - C2_1 - F1_1 | 79(2)             |
| C3_1 - C1_1 - C2_1 - F1_1 | -161(2)           |
| O1_1 - C1_1 - C3_1 - F4_1 | 74(2)             |
| C2_1 - C1_1 - C3_1 - F4_1 | -166.3(19)        |
| C4_1 - C1_1 - C3_1 - F4_1 | -45(2)            |
| O1_1 - C1_1 - C3_1 - F5_1 | -45(2)            |
| C2_1 - C1_1 - C3_1 - F5_1 | 75(2)             |
| C4_1 - C1_1 - C3_1 - F5_1 | -163.8(19)        |
| O1_1 - C1_1 - C3_1 - F6_1 | -164(2)           |
| C2_1 - C1_1 - C3_1 - F6_1 | -44(2)            |
| C4_1 - C1_1 - C3_1 - F6_1 | 77(2)             |
| O1_1 - C1_1 - C4_1 - F8_1 | -166(2)           |
| C2_1 - C1_1 - C4_1 - F8_1 | 74(2)             |
| C3_1 - C1_1 - C4_1 - F8_1 | -45(2)            |
| O1_1 - C1_1 - C4_1 - F7_1 | -45(2)            |
| C2_1 - C1_1 - C4_1 - F7_1 | -164(2)           |
| C3_1 - C1_1 - C4_1 - F7_1 | 76(2)             |
| O1_1 - C1_1 - C4_1 - F9_1 | 76(2)             |
| C2_1 - C1_1 - C4_1 - F9_1 | -44(2)            |
| C3_1 - C1_1 - C4_1 - F9_1 | -163.2(18)        |
| O1_2 - C1_2 - C2_2 - F2_2 | 149(3)            |
| C3_2 - C1_2 - C2_2 - F2_2 | 29(3)             |
| C4_2 - C1_2 - C2_2 - F2_2 | -95(2)            |
| O1_2 - C1_2 - C2_2 - F3_2 | 25(3)             |
| C3_2 - C1_2 - C2_2 - F3_2 | -94(3)            |
| C4_2 - C1_2 - C2_2 - F3_2 | 141(2)            |
| O1_2 - C1_2 - C2_2 - F1_2 | -89(3)            |
| C3_2 - C1_2 - C2_2 - F1_2 | 151(2)            |
| C4_2 - C1_2 - C2_2 - F1_2 | 27(2)             |
| O1_2 - C1_2 - C3_2 - F6_2 | 163(2)            |
| C4_2 - C1_2 - C3_2 - F6_2 | 45(2)             |
| C2_2 - C1_2 - C3_2 - F6_2 | -76(2)            |
| O1_2 - C1_2 - C3_2 - F5_2 | -74(2)            |
| C4_2 - C1_2 - C3_2 - F5_2 | 168(2)            |
| C2_2 - C1_2 - C3_2 - F5_2 | 47(2)             |
| O1_2 - C1_2 - C3_2 - F4_2 | 45(2)             |
| C4_2 - C1_2 - C3_2 - F4_2 | -72(2)            |
| C2_2 - C1_2 - C3_2 - F4_2 | 166(2)            |
| O1_2 - C1_2 - C4_2 - F7_2 | -74(2)            |
| C3_2 - C1_2 - C4_2 - F7_2 | 44(2)             |
| C2_2 - C1_2 - C4_2 - F7_2 | 168.1(19)         |
| O1_2 - C1_2 - C4_2 - F8_2 | 166(2)            |
| C3_2 - C1_2 - C4_2 - F8_2 | -76(2)            |
| C2_2 - C1_2 - C4_2 - F8_2 | 48(2)             |
| O1_2 - C1_2 - C4_2 - F9_2 | 46(2)             |
| C3_2 - C1_2 - C4_2 - F9_2 | 163(2)            |
| C2_2 - C1_2 - C4_2 - F9_2 | -72(2)            |



|                           |            |                           |            |
|---------------------------|------------|---------------------------|------------|
| O1_4 - A11 - O1_3 - C1_3  | 75(5)      | C2_4 - C1_4 - C4_4 - F9_4 | -43(2)     |
| O1_2 - A11 - O1_3 - C1_3  | -170(5)    | C3_4 - C1_4 - C4_4 - F9_4 | -165.8(18) |
| O1_8 - A11 - O1_3 - C1_3  | -38(5)     | F1_5 - C1_5 - C2_5 - F2_5 | 0(2)       |
| O1_1 - A11 - O1_3 - C1_3  | -53(5)     | C6_5 - C1_5 - C2_5 - F2_5 | -179.4(13) |
| O1_7 - A11 - O1_3 - C1_3  | -165(5)    | F1_5 - C1_5 - C2_5 - C3_5 | 179.6(13)  |
| A11 - O1_3 - C1_3 - C2_3  | -31(6)     | C6_5 - C1_5 - C2_5 - C3_5 | 0(2)       |
| A11 - O1_3 - C1_3 - C3_3  | 91(5)      | F2_5 - C2_5 - C3_5 - F3_5 | 0(2)       |
| A11 - O1_3 - C1_3 - C4_3  | -151(5)    | C1_5 - C2_5 - C3_5 - F3_5 | -179.4(13) |
| O1_3 - C1_3 - C2_3 - F3_3 | 41(2)      | F2_5 - C2_5 - C3_5 - C4_5 | 179.1(13)  |
| C3_3 - C1_3 - C2_3 - F3_3 | -81(2)     | C1_5 - C2_5 - C3_5 - C4_5 | 0(2)       |
| C4_3 - C1_3 - C2_3 - F3_3 | 159.9(18)  | F3_5 - C3_5 - C4_5 - F4_5 | -1(2)      |
| O1_3 - C1_3 - C2_3 - F2_3 | 160.6(18)  | C2_5 - C3_5 - C4_5 - F4_5 | -179.9(15) |
| C3_3 - C1_3 - C2_3 - F2_3 | 39(2)      | F3_5 - C3_5 - C4_5 - C5_5 | 179.8(14)  |
| C4_3 - C1_3 - C2_3 - F2_3 | -80.4(19)  | C2_5 - C3_5 - C4_5 - C5_5 | 0(2)       |
| O1_3 - C1_3 - C2_3 - F1_3 | -79(2)     | F4_5 - C4_5 - C5_5 - C6_5 | 179.8(16)  |
| C3_3 - C1_3 - C2_3 - F1_3 | 159.1(17)  | C3_5 - C4_5 - C5_5 - C6_5 | -1(2)      |
| C4_3 - C1_3 - C2_3 - F1_3 | 40(2)      | C2_5 - C1_5 - C6_5 - C5_5 | 0(2)       |
| O1_3 - C1_3 - C3_3 - F4_3 | 36(2)      | F1_5 - C1_5 - C6_5 - C5_5 | -179.7(14) |
| C2_3 - C1_3 - C3_3 - F4_3 | 160.8(19)  | C4_5 - C5_5 - C6_5 - C1_5 | 0(2)       |
| C4_3 - C1_3 - C3_3 - F4_3 | -81(2)     | F1_6 - C1_6 - C2_6 - F2_6 | 0(2)       |
| O1_3 - C1_3 - C3_3 - F6_3 | 156.5(18)  | C6_6 - C1_6 - C2_6 - F2_6 | -179.7(13) |
| C2_3 - C1_3 - C3_3 - F6_3 | -78.9(19)  | F1_6 - C1_6 - C2_6 - C3_6 | 179.7(14)  |
| C4_3 - C1_3 - C3_3 - F6_3 | 39(2)      | C6_6 - C1_6 - C2_6 - C3_6 | 0(2)       |
| O1_3 - C1_3 - C3_3 - F5_3 | -83.4(19)  | F2_6 - C2_6 - C3_6 - F3_6 | 0(2)       |
| C2_3 - C1_3 - C3_3 - F5_3 | 41(2)      | C1_6 - C2_6 - C3_6 - F3_6 | -180.0(14) |
| C4_3 - C1_3 - C3_3 - F5_3 | 159.2(17)  | F2_6 - C2_6 - C3_6 - C4_6 | 178.9(14)  |
| O1_3 - C1_3 - C4_3 - F9_3 | 45(2)      | C1_6 - C2_6 - C3_6 - C4_6 | -1(3)      |
| C2_3 - C1_3 - C4_3 - F9_3 | -78(2)     | F3_6 - C3_6 - C4_6 - F4_6 | -3(2)      |
| C3_3 - C1_3 - C4_3 - F9_3 | 162.8(18)  | C2_6 - C3_6 - C4_6 - F4_6 | 178.3(16)  |
| O1_3 - C1_3 - C4_3 - F8_3 | 162.8(19)  | F3_6 - C3_6 - C4_6 - C5_6 | -179.2(14) |
| C2_3 - C1_3 - C4_3 - F8_3 | 40(2)      | C2_6 - C3_6 - C4_6 - C5_6 | 2(3)       |
| C3_3 - C1_3 - C4_3 - F8_3 | -79(2)     | F4_6 - C4_6 - C5_6 - C6_6 | -178.1(16) |
| O1_3 - C1_3 - C4_3 - F7_3 | -73(2)     | C3_6 - C4_6 - C5_6 - C6_6 | -2(3)      |
| C2_3 - C1_3 - C4_3 - F7_3 | 164.5(18)  | C4_6 - C5_6 - C6_6 - C1_6 | 1(3)       |
| C3_3 - C1_3 - C4_3 - F7_3 | 45(2)      | C2_6 - C1_6 - C6_6 - C5_6 | 0(2)       |
| O1_4 - C1_4 - C2_4 - F1_4 | -46(2)     | F1_6 - C1_6 - C6_6 - C5_6 | -179.7(14) |
| C3_4 - C1_4 - C2_4 - F1_4 | -164.9(17) | O1_4 - A11 - O1_7 - C1_7  | 114(11)    |
| C4_4 - C1_4 - C2_4 - F1_4 | 73.2(19)   | O1_8 - A11 - O1_7 - C1_7  | -124(10)   |
| O1_4 - C1_4 - C2_4 - F3_4 | 74.3(19)   | O1_3 - A11 - O1_7 - C1_7  | -7(11)     |
| C3_4 - C1_4 - C2_4 - F3_4 | -45(2)     | A11 - O1_7 - C1_7 - C3_7  | 178(10)    |
| C4_4 - C1_4 - C2_4 - F3_4 | -166.9(15) | A11 - O1_7 - C1_7 - C2_7  | 55(11)     |
| O1_4 - C1_4 - C2_4 - F2_4 | -164.6(17) | A11 - O1_7 - C1_7 - C4_7  | -60(11)    |
| C3_4 - C1_4 - C2_4 - F2_4 | 76.1(19)   | O1_7 - C1_7 - C2_7 - F3_7 | 37(3)      |
| C4_4 - C1_4 - C2_4 - F2_4 | -45.8(19)  | C3_7 - C1_7 - C2_7 - F3_7 | -85(3)     |
| O1_4 - C1_4 - C3_4 - F5_4 | -42(2)     | C4_7 - C1_7 - C2_7 - F3_7 | 156(3)     |
| C2_4 - C1_4 - C3_4 - F5_4 | 76(2)      | O1_7 - C1_7 - C2_7 - F2_7 | 164(3)     |
| C4_4 - C1_4 - C3_4 - F5_4 | -162.2(19) | C3_7 - C1_7 - C2_7 - F2_7 | 41(3)      |
| O1_4 - C1_4 - C3_4 - F6_4 | -161(2)    | C4_7 - C1_7 - C2_7 - F2_7 | -77(3)     |
| C2_4 - C1_4 - C3_4 - F6_4 | -43(2)     | O1_7 - C1_7 - C2_7 - F1_7 | -79(3)     |
| C4_4 - C1_4 - C3_4 - F6_4 | 79(2)      | C3_7 - C1_7 - C2_7 - F1_7 | 158(3)     |
| O1_4 - C1_4 - C3_4 - F4_4 | 79(2)      | C4_7 - C1_7 - C2_7 - F1_7 | 40(3)      |
| C2_4 - C1_4 - C3_4 - F4_4 | -162.6(19) | O1_7 - C1_7 - C3_7 - F5_7 | -70(3)     |
| C4_4 - C1_4 - C3_4 - F4_4 | -41(2)     | C2_7 - C1_7 - C3_7 - F5_7 | 51(3)      |
| O1_4 - C1_4 - C4_4 - F8_4 | -165.6(19) | C4_7 - C1_7 - C3_7 - F5_7 | 168(3)     |
| C2_4 - C1_4 - C4_4 - F8_4 | 77(2)      | O1_7 - C1_7 - C3_7 - F4_7 | 49(3)      |
| C3_4 - C1_4 - C4_4 - F8_4 | -46(2)     | C2_7 - C1_7 - C3_7 - F4_7 | 170(3)     |
| O1_4 - C1_4 - C4_4 - F7_4 | -45(2)     | C4_7 - C1_7 - C3_7 - F4_7 | -73(3)     |
| C2_4 - C1_4 - C4_4 - F7_4 | -162.3(17) | O1_7 - C1_7 - C3_7 - F6_7 | 171(3)     |
| C3_4 - C1_4 - C4_4 - F7_4 | 75(2)      | C2_7 - C1_7 - C3_7 - F6_7 | -68(3)     |
| O1_4 - C1_4 - C4_4 - F9_4 | 74(2)      | C4_7 - C1_7 - C3_7 - F6_7 | 49(3)      |

|                           |            |
|---------------------------|------------|
| O1_7 - C1_7 - C4_7 - F7_7 | -56(4)     |
| C3_7 - C1_7 - C4_7 - F7_7 | 67(4)      |
| C2_7 - C1_7 - C4_7 - F7_7 | -173(3)    |
| O1_7 - C1_7 - C4_7 - F9_7 | 67(4)      |
| C3_7 - C1_7 - C4_7 - F9_7 | -170(3)    |
| C2_7 - C1_7 - C4_7 - F9_7 | -50(3)     |
| O1_7 - C1_7 - C4_7 - F8_7 | -176(3)    |
| C3_7 - C1_7 - C4_7 - F8_7 | -53(3)     |
| C2_7 - C1_7 - C4_7 - F8_7 | 67(3)      |
| O1_4 - A11 - O1_8 - C1_8  | 100(7)     |
| O1_3 - A11 - O1_8 - C1_8  | -141(7)    |
| O1_7 - A11 - O1_8 - C1_8  | -24(8)     |
| A11 - O1_8 - C1_8 - C4_8  | -40(7)     |
| A11 - O1_8 - C1_8 - C2_8  | 81(7)      |
| A11 - O1_8 - C1_8 - C3_8  | -161(7)    |
| O1_8 - C1_8 - C2_8 - F3_8 | 28(3)      |
| C4_8 - C1_8 - C2_8 - F3_8 | 151(3)     |
| C3_8 - C1_8 - C2_8 - F3_8 | -88(3)     |
| O1_8 - C1_8 - C2_8 - F2_8 | 148(3)     |
| C4_8 - C1_8 - C2_8 - F2_8 | -90(3)     |
| C3_8 - C1_8 - C2_8 - F2_8 | 31(3)      |
| O1_8 - C1_8 - C2_8 - F1_8 | -91(3)     |
| C4_8 - C1_8 - C2_8 - F1_8 | 31(3)      |
| C3_8 - C1_8 - C2_8 - F1_8 | 153(3)     |
| O1_8 - C1_8 - C3_8 - F6_8 | 165(3)     |
| C4_8 - C1_8 - C3_8 - F6_8 | 44(3)      |
| C2_8 - C1_8 - C3_8 - F6_8 | -76(3)     |
| O1_8 - C1_8 - C3_8 - F4_8 | 46(3)      |
| C4_8 - C1_8 - C3_8 - F4_8 | -75(3)     |
| C2_8 - C1_8 - C3_8 - F4_8 | 164(3)     |
| O1_8 - C1_8 - C3_8 - F5_8 | -74(3)     |
| C4_8 - C1_8 - C3_8 - F5_8 | 165(3)     |
| C2_8 - C1_8 - C3_8 - F5_8 | 44(3)      |
| O1_8 - C1_8 - C4_8 - F7_8 | -81(3)     |
| C2_8 - C1_8 - C4_8 - F7_8 | 158(3)     |
| C3_8 - C1_8 - C4_8 - F7_8 | 37(3)      |
| O1_8 - C1_8 - C4_8 - F9_8 | 39(3)      |
| C2_8 - C1_8 - C4_8 - F9_8 | -82(3)     |
| C3_8 - C1_8 - C4_8 - F9_8 | 158(3)     |
| O1_8 - C1_8 - C4_8 - F8_8 | 158(3)     |
| C2_8 - C1_8 - C4_8 - F8_8 | 37(3)      |
| C3_8 - C1_8 - C4_8 - F8_8 | -84(3)     |
| C6_9 - C1_9 - C2_9 - F2_9 | 179.7(14)  |
| F1_9 - C1_9 - C2_9 - F2_9 | 0(2)       |
| C6_9 - C1_9 - C2_9 - C3_9 | 0(3)       |
| F1_9 - C1_9 - C2_9 - C3_9 | -179.9(14) |
| F2_9 - C2_9 - C3_9 - F3_9 | 0(2)       |
| C1_9 - C2_9 - C3_9 - F3_9 | 180.0(14)  |
| F2_9 - C2_9 - C3_9 - C4_9 | -179.6(14) |
| C1_9 - C2_9 - C3_9 - C4_9 | 1(2)       |
| C2_9 - C3_9 - C4_9 - C5_9 | -1(2)      |
| F3_9 - C3_9 - C4_9 - C5_9 | 179.6(14)  |
| C2_9 - C3_9 - C4_9 - F4_9 | -180.0(15) |
| F3_9 - C3_9 - C4_9 - F4_9 | 1(2)       |
| F4_9 - C4_9 - C5_9 - C6_9 | -179.8(16) |
| C3_9 - C4_9 - C5_9 - C6_9 | 1(3)       |
| C4_9 - C5_9 - C6_9 - C1_9 | -1(2)      |
| C2_9 - C1_9 - C6_9 - C5_9 | 1(2)       |
| F1_9 - C1_9 - C6_9 - C5_9 | -179.8(14) |

## Structure of **4b**

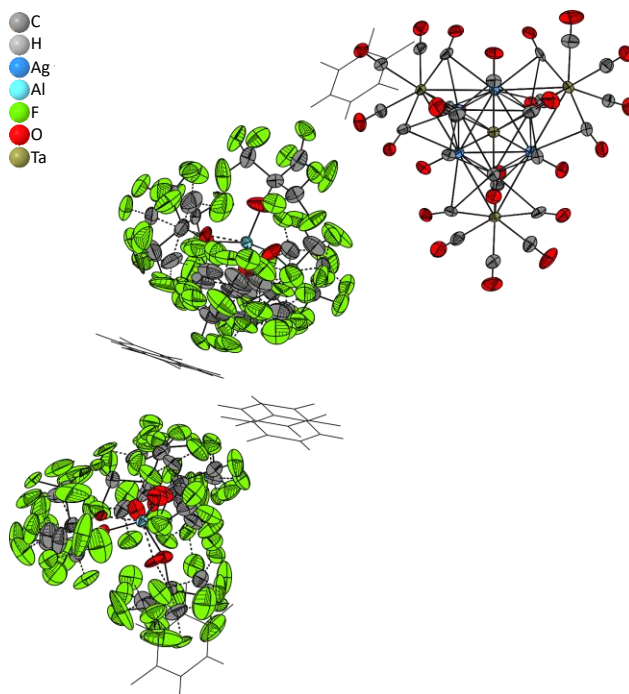

**Fig. S22.** Molecular structure of **4b**. Thermal ellipsoids are shown at the 50 % probability level. Solvent molecules (4FB) are displayed as wire frame and were partly disordered twice. Disorders of the anions are included with dashed bonds.

Four 4FB molecules were detected in the orthorhombic (*Pbca*) structure of **4b**. Fragments of the anions were disordered twice or three times.

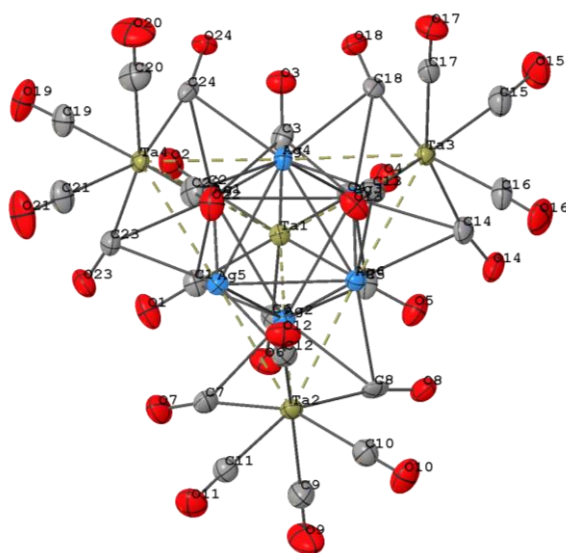

**Fig. S23.** Enlarged and labeled molecular structure of **4b<sup>2+</sup>**. Thermal ellipsoids are shown at the 50 % probability level.

## Structure Tables

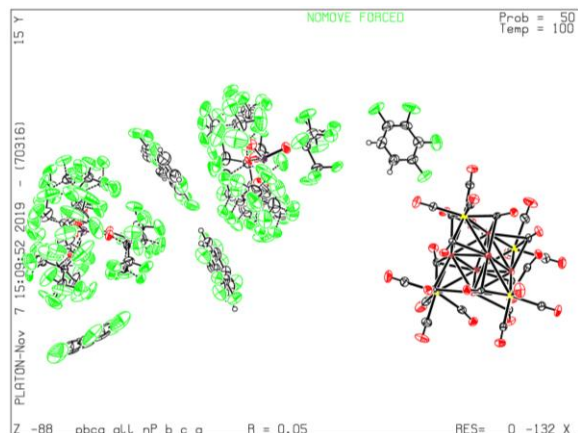

Table 1. Crystal data and structure refinement for pbca\_all\_new\_d-finalcif.cif

|                                                |                                                                                                                |
|------------------------------------------------|----------------------------------------------------------------------------------------------------------------|
| CCDC number                                    | 1998922                                                                                                        |
| Empirical formula                              | C <sub>80</sub> H <sub>8</sub> Ag <sub>6</sub> Al <sub>2</sub> F <sub>88</sub> O <sub>32</sub> Ta <sub>4</sub> |
| Formula weight                                 | 4577.85                                                                                                        |
| Temperature [K]                                | 100(2)                                                                                                         |
| Crystal system                                 | orthorhombic                                                                                                   |
| Space group (number)                           | <i>Pbca</i> (61)                                                                                               |
| <i>a</i> [Å]                                   | 30.459(12)                                                                                                     |
| <i>b</i> [Å]                                   | 21.418(12)                                                                                                     |
| <i>c</i> [Å]                                   | 36.508(17)                                                                                                     |
| $\alpha$ [Å]                                   | 90                                                                                                             |
| $\beta$ [Å]                                    | 90                                                                                                             |
| $\gamma$ [Å]                                   | 90                                                                                                             |
| Volume [Å <sup>3</sup> ]                       | 23817(19)                                                                                                      |
| <i>Z</i>                                       | 8                                                                                                              |
| $\rho_{\text{calc}}$ [g/cm <sup>3</sup> ]      | 2.553                                                                                                          |
| $\mu$ [mm <sup>-1</sup> ]                      | 4.848                                                                                                          |
| <i>F</i> (000)                                 | 17088                                                                                                          |
| Crystal size [mm <sup>3</sup> ]                | 0.300×0.100×0.060                                                                                              |
| Crystal colour                                 | red                                                                                                            |
| Crystal shape                                  | needle                                                                                                         |
| Radiation                                      | MoK $\alpha$ ( $\lambda$ =0.71073)                                                                             |
| 2 $\theta$ range [°]                           | 2.23 to 52.86                                                                                                  |
| Index ranges                                   | -38 ≤ <i>h</i> ≤ 38, -26 ≤ <i>k</i> ≤ 26, -45 ≤ <i>l</i> ≤ 45                                                  |
| Reflections collected                          | 542712                                                                                                         |
| Independent reflections                        | 24489<br>$R_{\text{int}} = 0.0879$ , $R_{\text{sigma}} = 0.0307$                                               |
| Completeness to $\theta = 25.242^\circ$        | 100.00                                                                                                         |
| Data / Restraints / Parameters                 | 24489/43315/3072                                                                                               |
| Goodness-of-fit on $F^2$                       | 1.215                                                                                                          |
| Final <i>R</i> indexes [ $I \geq 2\sigma(I)$ ] | $R_1 = 0.0485$ , $wR_2 = 0.0917$                                                                               |
| Final <i>R</i> indexes [all data]              | $R_1 = 0.0636$ , $wR_2 = 0.0978$                                                                               |
| Largest peak/hole [eÅ <sup>-3</sup> ]          | 1.70/-1.25                                                                                                     |

Table 2. Bond lengths and angles for pbca\_all\_new\_d-finalcif.cif.

| Atom - Atom   | Length [Å] |
|---------------|------------|
| O1_1 - C1_1   | 1.331(9)   |
| O1_1 - Al1    | 1.685(7)   |
| C1_1 - C4_1   | 1.539(10)  |
| C1_1 - C3_1   | 1.540(10)  |
| C1_1 - C2_1   | 1.546(9)   |
| C2_1 - F3_1   | 1.323(9)   |
| C2_1 - F2_1   | 1.323(9)   |
| C2_1 - F1_1   | 1.328(9)   |
| C3_1 - F4_1   | 1.323(9)   |
| C3_1 - F6_1   | 1.336(10)  |
| C3_1 - F5_1   | 1.337(9)   |
| C4_1 - F8_1   | 1.319(10)  |
| C4_1 - F9_1   | 1.324(10)  |
| C4_1 - F7_1   | 1.332(9)   |
| F1_5 - C1_5   | 1.354(9)   |
| F2_5 - C2_5   | 1.337(9)   |
| F3_5 - C3_5   | 1.330(9)   |
| F4_5 - C4_5   | 1.343(9)   |
| C1_5 - C6_5   | 1.341(10)  |
| C1_5 - C2_5   | 1.367(10)  |
| C2_5 - C3_5   | 1.363(10)  |
| C3_5 - C4_5   | 1.359(10)  |
| C4_5 - C5_5   | 1.369(10)  |
| C5_5 - C6_5   | 1.382(10)  |
| O1_15 - C1_15 | 1.345(13)  |
| O1_15 - Al2   | 1.698(11)  |
| C1_15 - C2_15 | 1.529(12)  |
| C1_15 - C4_15 | 1.538(12)  |
| C1_15 - C3_15 | 1.539(13)  |
| C2_15 - F3_15 | 1.305(13)  |
| C2_15 - F2_15 | 1.308(13)  |
| C2_15 - F1_15 | 1.336(13)  |
| C3_15 - F6_15 | 1.300(13)  |
| C3_15 - F5_15 | 1.320(13)  |
| C3_15 - F4_15 | 1.328(13)  |
| C4_15 - F9_15 | 1.304(13)  |
| C4_15 - F8_15 | 1.317(12)  |
| C4_15 - F7_15 | 1.332(13)  |
| F1_14 - C1_14 | 1.351(12)  |
| F2_14 - C2_14 | 1.342(13)  |
| F3_14 - C3_14 | 1.345(13)  |
| F4_14 - C4_14 | 1.334(12)  |
| C1_14 - C2_14 | 1.364(12)  |
| C1_14 - C6_14 | 1.364(13)  |
| C2_14 - C3_14 | 1.364(12)  |
| C3_14 - C4_14 | 1.359(13)  |
| C4_14 - C5_14 | 1.358(13)  |
| C5_14 - C6_14 | 1.370(13)  |
| F1_13 - C1_13 | 1.353(13)  |
| F2_13 - C2_13 | 1.349(12)  |

|               |           |             |           |
|---------------|-----------|-------------|-----------|
| F3_13 - C3_13 | 1.336(11) | C2_9 - F2_9 | 1.322(13) |
| F4_13 - C4_13 | 1.348(13) | C2_9 - F1_9 | 1.341(13) |
| C1_13 - C2_13 | 1.354(12) | C3_9 - F4_9 | 1.312(13) |
| C1_13 - C6_13 | 1.363(12) | C3_9 - F5_9 | 1.315(13) |
| C2_13 - C3_13 | 1.365(12) | C3_9 - F6_9 | 1.328(13) |
| C3_13 - C4_13 | 1.366(12) | C4_9 - F8_9 | 1.319(13) |
| C4_13 - C5_13 | 1.360(12) | C4_9 - F7_9 | 1.327(13) |
| C5_13 - C6_13 | 1.369(13) | C4_9 - F9_9 | 1.331(13) |
| O1_12 - C1_12 | 1.328(12) | O1_8 - C1_8 | 1.343(12) |
| O1_12 - Al2   | 1.664(10) | O1_8 - Al1  | 1.684(10) |
| C1_12 - C3_12 | 1.532(12) | C1_8 - C2_8 | 1.533(12) |
| C1_12 - C2_12 | 1.535(12) | C1_8 - C4_8 | 1.543(12) |
| C1_12 - C4_12 | 1.542(12) | C1_8 - C3_8 | 1.544(12) |
| C2_12 - F1_12 | 1.305(13) | C2_8 - F1_8 | 1.318(13) |
| C2_12 - F3_12 | 1.317(13) | C2_8 - F3_8 | 1.326(13) |
| C2_12 - F2_12 | 1.332(13) | C2_8 - F2_8 | 1.332(13) |
| C3_12 - F6_12 | 1.310(13) | C3_8 - F4_8 | 1.320(12) |
| C3_12 - F5_12 | 1.312(13) | C3_8 - F6_8 | 1.321(12) |
| C3_12 - F4_12 | 1.324(13) | C3_8 - F5_8 | 1.323(13) |
| C4_12 - F7_12 | 1.309(12) | C4_8 - F7_8 | 1.318(12) |
| C4_12 - F8_12 | 1.321(12) | C4_8 - F8_8 | 1.318(12) |
| C4_12 - F9_12 | 1.323(13) | C4_8 - F9_8 | 1.319(13) |
| O1_11 - C1_11 | 1.339(12) | O1_7 - C1_7 | 1.345(13) |
| O1_11 - Al2   | 1.687(9)  | O1_7 - Al1  | 1.677(12) |
| C1_11 - C4_11 | 1.529(12) | C1_7 - C3_7 | 1.534(13) |
| C1_11 - C3_11 | 1.530(12) | C1_7 - C2_7 | 1.538(13) |
| C1_11 - C2_11 | 1.531(12) | C1_7 - C4_7 | 1.538(13) |
| C2_11 - F2_11 | 1.300(13) | C2_7 - F3_7 | 1.315(13) |
| C2_11 - F3_11 | 1.312(12) | C2_7 - F2_7 | 1.322(13) |
| C2_11 - F1_11 | 1.318(13) | C2_7 - F1_7 | 1.328(13) |
| C3_11 - F6_11 | 1.318(13) | C3_7 - F4_7 | 1.313(13) |
| C3_11 - F5_11 | 1.325(13) | C3_7 - F6_7 | 1.327(13) |
| C3_11 - F4_11 | 1.332(13) | C3_7 - F5_7 | 1.328(14) |
| C4_11 - F7_11 | 1.284(12) | C4_7 - F8_7 | 1.313(13) |
| C4_11 - F9_11 | 1.313(12) | C4_7 - F9_7 | 1.321(13) |
| C4_11 - F8_11 | 1.341(12) | C4_7 - F7_7 | 1.323(13) |
| O1_10 - C1_10 | 1.348(12) | F1_6 - C1_6 | 1.350(11) |
| O1_10 - Al2   | 1.756(10) | F2_6 - C2_6 | 1.338(11) |
| C1_10 - C3_10 | 1.532(12) | F3_6 - C3_6 | 1.338(11) |
| C1_10 - C2_10 | 1.545(12) | F4_6 - C4_6 | 1.344(11) |
| C1_10 - C4_10 | 1.553(12) | C1_6 - C2_6 | 1.361(11) |
| C2_10 - F2_10 | 1.318(13) | C1_6 - C6_6 | 1.362(12) |
| C2_10 - F3_10 | 1.321(12) | C2_6 - C3_6 | 1.371(11) |
| C2_10 - F1_10 | 1.331(13) | C3_6 - C4_6 | 1.358(11) |
| C3_10 - F4_10 | 1.308(13) | C4_6 - C5_6 | 1.368(11) |
| C3_10 - F5_10 | 1.319(12) | C5_6 - C6_6 | 1.357(12) |
| C3_10 - F6_10 | 1.321(12) | O1_4 - C1_4 | 1.350(13) |
| C4_10 - F8_10 | 1.318(12) | O1_4 - Al2  | 1.734(11) |
| C4_10 - F9_10 | 1.333(12) | C1_4 - C4_4 | 1.531(13) |
| C4_10 - F7_10 | 1.339(12) | C1_4 - C3_4 | 1.541(13) |
| O1_9 - C1_9   | 1.353(12) | C1_4 - C2_4 | 1.548(13) |
| O1_9 - Al1    | 1.744(11) | C2_4 - F3_4 | 1.307(13) |
| C1_9 - C3_9   | 1.538(12) | C2_4 - F1_4 | 1.338(13) |
| C1_9 - C2_9   | 1.540(12) | C2_4 - F2_4 | 1.343(14) |
| C1_9 - C4_9   | 1.542(12) | C3_4 - F4_4 | 1.312(13) |
| C2_9 - F3_9   | 1.296(12) | C3_4 - F6_4 | 1.318(13) |

|             |            |             |            |
|-------------|------------|-------------|------------|
| C3_4 - F5_4 | 1.337(14)  | Ta2 - C8    | 2.115(10)  |
| C4_4 - F8_4 | 1.301(13)  | Ta2 - C12   | 2.121(9)   |
| C4_4 - F7_4 | 1.325(13)  | Ta2 - C7    | 2.133(9)   |
| C4_4 - F9_4 | 1.330(14)  | Ta2 - C10   | 2.150(10)  |
| O1_3 - C1_3 | 1.347(12)  | Ta2 - C9    | 2.159(11)  |
| O1_3 - Al2  | 1.704(11)  | Ta2 - C11   | 2.162(9)   |
| C1_3 - C4_3 | 1.535(12)  | Ta2 - Ag2   | 2.9787(13) |
| C1_3 - C3_3 | 1.538(12)  | Ta2 - Ag6   | 2.9854(12) |
| C1_3 - C2_3 | 1.540(12)  | Ta2 - Ag5   | 3.0073(13) |
| C2_3 - F3_3 | 1.317(12)  | O2 - C2     | 1.136(10)  |
| C2_3 - F2_3 | 1.320(12)  | Ag2 - C7    | 2.626(9)   |
| C2_3 - F1_3 | 1.335(12)  | Ag2 - C8    | 2.648(8)   |
| C3_3 - F5_3 | 1.297(13)  | Ag2 - C5    | 2.650(9)   |
| C3_3 - F4_3 | 1.311(12)  | Ag2 - Ag5   | 2.8876(13) |
| C3_3 - F6_3 | 1.330(13)  | Ag2 - Ag3   | 2.8919(13) |
| C4_3 - F8_3 | 1.304(13)  | Ag2 - Ag6   | 2.9083(12) |
| C4_3 - F7_3 | 1.311(13)  | Al2 - O1_20 | 1.75(2)    |
| C4_3 - F9_3 | 1.315(13)  | Ta3 - C18   | 2.123(9)   |
| O1_2 - C1_2 | 1.325(11)  | Ta3 - C14   | 2.125(9)   |
| O1_2 - Al2  | 1.680(10)  | Ta3 - C13   | 2.132(9)   |
| C1_2 - C4_2 | 1.539(11)  | Ta3 - C16   | 2.159(10)  |
| C1_2 - C2_2 | 1.542(12)  | Ta3 - C15   | 2.161(10)  |
| C1_2 - C3_2 | 1.543(12)  | Ta3 - C17   | 2.162(9)   |
| C2_2 - F3_2 | 1.317(12)  | Ta3 - Ag4   | 2.9658(17) |
| C2_2 - F2_2 | 1.318(12)  | Ta3 - Ag6   | 2.9868(12) |
| C2_2 - F1_2 | 1.323(12)  | Ta3 - Ag3   | 2.9903(12) |
| C3_2 - F5_2 | 1.306(12)  | O3 - C3     | 1.154(11)  |
| C3_2 - F4_2 | 1.317(12)  | C3 - Ag3    | 2.627(9)   |
| C3_2 - F6_2 | 1.327(12)  | Ag3 - C18   | 2.628(8)   |
| C4_2 - F8_2 | 1.313(12)  | Ag3 - C5    | 2.649(9)   |
| C4_2 - F9_2 | 1.324(12)  | Ag3 - C14   | 2.672(9)   |
| C4_2 - F7_2 | 1.329(12)  | Ag3 - Ag6   | 2.8819(13) |
| Ta1 - C1    | 2.123(9)   | Ag3 - Ag4   | 2.9222(13) |
| Ta1 - C3    | 2.124(9)   | Ta4 - C24   | 2.102(9)   |
| Ta1 - C5    | 2.124(9)   | Ta4 - C22   | 2.119(10)  |
| Ta1 - C2    | 2.160(9)   | Ta4 - C23   | 2.129(9)   |
| Ta1 - C4    | 2.167(9)   | Ta4 - C20   | 2.156(11)  |
| Ta1 - C6    | 2.173(9)   | Ta4 - C19   | 2.166(10)  |
| Ta1 - Ag1   | 2.9685(13) | Ta4 - C21   | 2.170(10)  |
| Ta1 - Ag2   | 2.9732(12) | Ta4 - Ag4   | 2.9671(16) |
| Ta1 - Ag3   | 2.9879(11) | Ta4 - Ag5   | 3.0155(13) |
| O1 - C1     | 1.142(10)  | Ag4 - C13   | 2.597(9)   |
| C1 - Ag1    | 2.591(8)   | Ag4 - C24   | 2.626(8)   |
| C1 - Ag2    | 2.652(9)   | Ag4 - C18   | 2.668(9)   |
| Ag1 - C24   | 2.620(8)   | Ag4 - C22   | 2.706(9)   |
| Ag1 - C3    | 2.652(9)   | Ag4 - Ag5   | 2.9193(13) |
| Ag1 - C23   | 2.663(9)   | Ag4 - Ag6   | 2.9259(14) |
| Ag1 - Ag4   | 2.8590(12) | O4 - C4     | 1.115(10)  |
| Ag1 - Ag3   | 2.9053(17) | Ag5 - C23   | 2.582(9)   |
| Ag1 - Ag2   | 2.9093(14) | Ag5 - C12   | 2.615(9)   |
| Ag1 - Ag5   | 2.9203(13) | Ag5 - Ag6   | 2.8627(17) |
| Ag1 - Ta4   | 2.9755(12) | O5 - C5     | 1.142(10)  |
| Al1 - O1_18 | 1.684(10)  | Ag6 - C8    | 2.585(9)   |
| Al1 - O1_19 | 1.700(11)  | Ag6 - C13   | 2.588(9)   |
| Al1 - O1_21 | 1.731(13)  | Ag6 - C14   | 2.691(9)   |
| Al1 - O1_22 | 1.81(3)    | O6 - C6     | 1.122(10)  |

|               |           |                           |                  |
|---------------|-----------|---------------------------|------------------|
| C9 - O9       | 1.128(12) | C2_19 - F3_19             | 1.323(14)        |
| O8 - C8       | 1.154(11) | C2_19 - F1_19             | 1.327(13)        |
| C7 - O7       | 1.143(11) | C3_19 - F4_19             | 1.318(13)        |
| O13 - C13     | 1.137(10) | C3_19 - F6_19             | 1.319(13)        |
| C12 - O12     | 1.153(11) | C3_19 - F5_19             | 1.323(13)        |
| C11 - O11     | 1.119(11) | C4_19 - F8_19             | 1.315(13)        |
| C10 - O10     | 1.135(11) | C4_19 - F7_19             | 1.324(13)        |
| C16 - O16     | 1.118(11) | C4_19 - F9_19             | 1.324(13)        |
| O15 - C15     | 1.123(12) | O1_20 - C1_20             | 1.346(14)        |
| C14 - O14     | 1.135(11) | C1_20 - C4_20             | 1.537(13)        |
| C20 - O20     | 1.113(12) | C1_20 - C2_20             | 1.542(13)        |
| C21 - O21     | 1.122(11) | C1_20 - C3_20             | 1.544(13)        |
| C22 - O22     | 1.153(11) | C2_20 - F3_20             | 1.325(13)        |
| C23 - O23     | 1.150(10) | C2_20 - F2_20             | 1.327(13)        |
| C24 - O24     | 1.161(10) | C2_20 - F1_20             | 1.329(13)        |
| C19 - O19     | 1.120(11) | C3_20 - F6_20             | 1.318(13)        |
| C18 - O18     | 1.144(10) | C3_20 - F5_20             | 1.326(13)        |
| C17 - O17     | 1.125(10) | C3_20 - F4_20             | 1.327(13)        |
| F1_16 - C1_16 | 1.343(13) | C4_20 - F9_20             | 1.315(13)        |
| F2_16 - C2_16 | 1.340(14) | C4_20 - F7_20             | 1.318(13)        |
| F3_16 - C3_16 | 1.348(13) | C4_20 - F8_20             | 1.324(13)        |
| F4_16 - C4_16 | 1.345(13) | O1_21 - C1_21             | 1.363(13)        |
| C1_16 - C6_16 | 1.362(13) | C1_21 - C3_21             | 1.537(13)        |
| C1_16 - C2_16 | 1.364(13) | C1_21 - C4_21             | 1.541(13)        |
| C2_16 - C3_16 | 1.365(13) | C1_21 - C2_21             | 1.542(13)        |
| C3_16 - C4_16 | 1.365(13) | C2_21 - F1_21             | 1.321(13)        |
| C4_16 - C5_16 | 1.359(14) | C2_21 - F2_21             | 1.323(13)        |
| C5_16 - C6_16 | 1.365(14) | C2_21 - F3_21             | 1.327(13)        |
| F1_17 - C1_17 | 1.341(14) | C3_21 - F6_21             | 1.325(13)        |
| F2_17 - C2_17 | 1.339(14) | C3_21 - F5_21             | 1.325(13)        |
| F3_17 - C3_17 | 1.341(14) | C3_21 - F4_21             | 1.326(13)        |
| F4_17 - C4_17 | 1.343(14) | C4_21 - F7_21             | 1.318(13)        |
| C1_17 - C2_17 | 1.362(13) | C4_21 - F8_21             | 1.322(13)        |
| C1_17 - C6_17 | 1.365(14) | C4_21 - F9_21             | 1.330(13)        |
| C2_17 - C3_17 | 1.365(13) | O1_22 - C1_22             | 1.347(15)        |
| C3_17 - C4_17 | 1.358(13) | C1_22 - C4_22             | 1.535(13)        |
| C4_17 - C5_17 | 1.363(14) | C1_22 - C3_22             | 1.540(13)        |
| C5_17 - C6_17 | 1.362(14) | C1_22 - C2_22             | 1.541(13)        |
| O1_18 - C1_18 | 1.337(12) | C2_22 - F2_22             | 1.320(14)        |
| C1_18 - C3_18 | 1.537(13) | C2_22 - F3_22             | 1.322(14)        |
| C1_18 - C4_18 | 1.538(12) | C2_22 - F1_22             | 1.322(14)        |
| C1_18 - C2_18 | 1.547(12) | C3_22 - F6_22             | 1.318(14)        |
| C2_18 - F2_18 | 1.298(13) | C3_22 - F5_22             | 1.321(14)        |
| C2_18 - F1_18 | 1.304(13) | C3_22 - F4_22             | 1.326(14)        |
| C2_18 - F3_18 | 1.315(13) | C4_22 - F7_22             | 1.318(14)        |
| C3_18 - F4_18 | 1.315(13) | C4_22 - F9_22             | 1.324(14)        |
| C3_18 - F6_18 | 1.322(13) | C4_22 - F8_22             | 1.324(14)        |
| C3_18 - F5_18 | 1.322(13) |                           |                  |
| C4_18 - F9_18 | 1.306(13) | <b>Atom - Atom - Atom</b> | <b>Angle [°]</b> |
| C4_18 - F8_18 | 1.317(13) | C1_1 - O1_1 - Al1         | 156.4(7)         |
| C4_18 - F7_18 | 1.324(13) | O1_1 - C1_1 - C4_1        | 110.8(8)         |
| O1_19 - C1_19 | 1.353(13) | O1_1 - C1_1 - C3_1        | 107.6(7)         |
| C1_19 - C4_19 | 1.539(13) | C4_1 - C1_1 - C3_1        | 107.7(7)         |
| C1_19 - C3_19 | 1.542(12) | O1_1 - C1_1 - C2_1        | 112.8(7)         |
| C1_19 - C2_19 | 1.547(13) | C4_1 - C1_1 - C2_1        | 109.0(6)         |
| C2_19 - F2_19 | 1.318(13) | C3_1 - C1_1 - C2_1        | 108.7(7)         |

|                       |           |                       |           |
|-----------------------|-----------|-----------------------|-----------|
| F3_1 - C2_1 - F2_1    | 107.0(8)  | F7_15 - C4_15 - C1_15 | 112.3(12) |
| F3_1 - C2_1 - F1_1    | 107.3(8)  | F1_14 - C1_14 - C2_14 | 119.2(14) |
| F2_1 - C2_1 - F1_1    | 107.3(8)  | F1_14 - C1_14 - C6_14 | 119.6(15) |
| F3_1 - C2_1 - C1_1    | 111.3(7)  | C2_14 - C1_14 - C6_14 | 121.2(13) |
| F2_1 - C2_1 - C1_1    | 112.6(7)  | F2_14 - C2_14 - C1_14 | 120.6(13) |
| F1_1 - C2_1 - C1_1    | 111.1(7)  | F2_14 - C2_14 - C3_14 | 118.8(13) |
| F4_1 - C3_1 - F6_1    | 107.6(8)  | C1_14 - C2_14 - C3_14 | 120.6(13) |
| F4_1 - C3_1 - F5_1    | 106.9(8)  | F3_14 - C3_14 - C4_14 | 120.0(13) |
| F6_1 - C3_1 - F5_1    | 107.7(9)  | F3_14 - C3_14 - C2_14 | 122.1(13) |
| F4_1 - C3_1 - C1_1    | 111.7(8)  | C4_14 - C3_14 - C2_14 | 117.9(13) |
| F6_1 - C3_1 - C1_1    | 112.0(7)  | F4_14 - C4_14 - C5_14 | 120.0(15) |
| F5_1 - C3_1 - C1_1    | 110.7(8)  | F4_14 - C4_14 - C3_14 | 118.1(14) |
| F8_1 - C4_1 - F9_1    | 107.4(8)  | C5_14 - C4_14 - C3_14 | 121.9(13) |
| F8_1 - C4_1 - F7_1    | 106.9(8)  | C4_14 - C5_14 - C6_14 | 120.1(15) |
| F9_1 - C4_1 - F7_1    | 108.9(8)  | C1_14 - C6_14 - C5_14 | 118.2(15) |
| F8_1 - C4_1 - C1_1    | 113.5(7)  | F1_13 - C1_13 - C2_13 | 118.4(12) |
| F9_1 - C4_1 - C1_1    | 109.3(8)  | F1_13 - C1_13 - C6_13 | 120.8(12) |
| F7_1 - C4_1 - C1_1    | 110.8(7)  | C2_13 - C1_13 - C6_13 | 120.7(12) |
| C6_5 - C1_5 - F1_5    | 122.3(9)  | F2_13 - C2_13 - C1_13 | 119.2(11) |
| C6_5 - C1_5 - C2_5    | 121.9(8)  | F2_13 - C2_13 - C3_13 | 121.1(11) |
| F1_5 - C1_5 - C2_5    | 115.8(9)  | C1_13 - C2_13 - C3_13 | 119.8(12) |
| F2_5 - C2_5 - C3_5    | 122.2(9)  | F3_13 - C3_13 - C2_13 | 119.4(11) |
| F2_5 - C2_5 - C1_5    | 118.6(8)  | F3_13 - C3_13 - C4_13 | 119.9(11) |
| C3_5 - C2_5 - C1_5    | 119.2(8)  | C2_13 - C3_13 - C4_13 | 120.7(11) |
| F3_5 - C3_5 - C4_5    | 119.9(8)  | F4_13 - C4_13 - C5_13 | 123.5(13) |
| F3_5 - C3_5 - C2_5    | 120.2(8)  | F4_13 - C4_13 - C3_13 | 117.8(12) |
| C4_5 - C3_5 - C2_5    | 119.9(8)  | C5_13 - C4_13 - C3_13 | 118.7(13) |
| F4_5 - C4_5 - C3_5    | 119.2(8)  | C4_13 - C5_13 - C6_13 | 121.3(14) |
| F4_5 - C4_5 - C5_5    | 120.3(8)  | C1_13 - C6_13 - C5_13 | 118.8(13) |
| C3_5 - C4_5 - C5_5    | 120.5(8)  | C1_12 - O1_12 - A12   | 155.1(12) |
| C4_5 - C5_5 - C6_5    | 119.5(9)  | O1_12 - C1_12 - C3_12 | 109.2(11) |
| C1_5 - C6_5 - C5_5    | 119.0(9)  | O1_12 - C1_12 - C2_12 | 112.0(12) |
| C1_15 - O1_15 - A12   | 146.2(18) | C3_12 - C1_12 - C2_12 | 108.8(10) |
| O1_15 - C1_15 - C2_15 | 106.1(12) | O1_12 - C1_12 - C4_12 | 107.3(10) |
| O1_15 - C1_15 - C4_15 | 113.5(13) | C3_12 - C1_12 - C4_12 | 110.1(10) |
| C2_15 - C1_15 - C4_15 | 110.5(11) | C2_12 - C1_12 - C4_12 | 109.4(10) |
| O1_15 - C1_15 - C3_15 | 107.4(14) | F1_12 - C2_12 - F3_12 | 107.9(15) |
| C2_15 - C1_15 - C3_15 | 112.1(11) | F1_12 - C2_12 - F2_12 | 107.4(16) |
| C4_15 - C1_15 - C3_15 | 107.3(10) | F3_12 - C2_12 - F2_12 | 104.0(15) |
| F3_15 - C2_15 - F2_15 | 107.4(14) | F1_12 - C2_12 - C1_12 | 114.1(12) |
| F3_15 - C2_15 - F1_15 | 106.5(16) | F3_12 - C2_12 - C1_12 | 110.9(13) |
| F2_15 - C2_15 - F1_15 | 104.5(16) | F2_12 - C2_12 - C1_12 | 111.9(12) |
| F3_15 - C2_15 - C1_15 | 113.9(13) | F6_12 - C3_12 - F5_12 | 108.6(14) |
| F2_15 - C2_15 - C1_15 | 113.6(13) | F6_12 - C3_12 - F4_12 | 104.5(16) |
| F1_15 - C2_15 - C1_15 | 110.3(14) | F5_12 - C3_12 - F4_12 | 106.1(14) |
| F6_15 - C3_15 - F5_15 | 109.2(15) | F6_12 - C3_12 - C1_12 | 114.6(12) |
| F6_15 - C3_15 - F4_15 | 108.8(15) | F5_12 - C3_12 - C1_12 | 113.2(11) |
| F5_15 - C3_15 - F4_15 | 105.3(15) | F4_12 - C3_12 - C1_12 | 109.2(12) |
| F6_15 - C3_15 - C1_15 | 112.6(13) | F7_12 - C4_12 - F8_12 | 107.5(13) |
| F5_15 - C3_15 - C1_15 | 109.7(12) | F7_12 - C4_12 - F9_12 | 108.1(13) |
| F4_15 - C3_15 - C1_15 | 111.1(13) | F8_12 - C4_12 - F9_12 | 107.6(13) |
| F9_15 - C4_15 - F8_15 | 112.7(15) | F7_12 - C4_12 - C1_12 | 111.3(11) |
| F9_15 - C4_15 - F7_15 | 100.6(13) | F8_12 - C4_12 - C1_12 | 111.3(11) |
| F8_15 - C4_15 - F7_15 | 108.2(15) | F9_12 - C4_12 - C1_12 | 111.0(11) |
| F9_15 - C4_15 - C1_15 | 110.3(12) | C1_11 - O1_11 - A12   | 149.6(11) |
| F8_15 - C4_15 - C1_15 | 112.1(11) | O1_11 - C1_11 - C4_11 | 114.2(10) |



|                       |           |                    |           |
|-----------------------|-----------|--------------------|-----------|
| O1_11 - C1_11 - C3_11 | 104.7(11) | F3_9 - C2_9 - F1_9 | 110.0(15) |
| C4_11 - C1_11 - C3_11 | 109.0(10) | F2_9 - C2_9 - F1_9 | 105.3(15) |
| O1_11 - C1_11 - C2_11 | 109.6(11) | F3_9 - C2_9 - C1_9 | 111.8(12) |
| C4_11 - C1_11 - C2_11 | 106.8(9)  | F2_9 - C2_9 - C1_9 | 113.6(13) |
| C3_11 - C1_11 - C2_11 | 112.8(11) | F1_9 - C2_9 - C1_9 | 106.1(13) |
| F2_11 - C2_11 - F3_11 | 102.6(13) | F4_9 - C3_9 - F5_9 | 104.6(15) |
| F2_11 - C2_11 - F1_11 | 101.0(14) | F4_9 - C3_9 - F6_9 | 110.5(15) |
| F3_11 - C2_11 - F1_11 | 117.7(17) | F5_9 - C3_9 - F6_9 | 107.9(15) |
| F2_11 - C2_11 - C1_11 | 111.9(12) | F4_9 - C3_9 - C1_9 | 109.6(12) |
| F3_11 - C2_11 - C1_11 | 110.9(12) | F5_9 - C3_9 - C1_9 | 111.4(12) |
| F1_11 - C2_11 - C1_11 | 111.9(12) | F6_9 - C3_9 - C1_9 | 112.4(13) |
| F6_11 - C3_11 - F5_11 | 111.0(16) | F8_9 - C4_9 - F7_9 | 108.4(15) |
| F6_11 - C3_11 - F4_11 | 108.3(16) | F8_9 - C4_9 - F9_9 | 106.0(15) |
| F5_11 - C3_11 - F4_11 | 109.6(16) | F7_9 - C4_9 - F9_9 | 110.1(16) |
| F6_11 - C3_11 - C1_11 | 112.6(14) | F8_9 - C4_9 - C1_9 | 112.5(12) |
| F5_11 - C3_11 - C1_11 | 107.8(13) | F7_9 - C4_9 - C1_9 | 109.0(13) |
| F4_11 - C3_11 - C1_11 | 107.5(12) | F9_9 - C4_9 - C1_9 | 110.7(12) |
| F7_11 - C4_11 - F9_11 | 107.1(14) | C1_8 - O1_8 - Al1  | 159.4(13) |
| F7_11 - C4_11 - F8_11 | 106.7(12) | O1_8 - C1_8 - C2_8 | 107.4(11) |
| F9_11 - C4_11 - F8_11 | 110.4(14) | O1_8 - C1_8 - C4_8 | 110.1(11) |
| F7_11 - C4_11 - C1_11 | 112.0(10) | C2_8 - C1_8 - C4_8 | 109.3(10) |
| F9_11 - C4_11 - C1_11 | 109.6(12) | O1_8 - C1_8 - C3_8 | 110.6(11) |
| F8_11 - C4_11 - C1_11 | 110.9(11) | C2_8 - C1_8 - C3_8 | 110.0(10) |
| C1_10 - O1_10 - Al2   | 155.0(11) | C4_8 - C1_8 - C3_8 | 109.4(10) |
| O1_10 - C1_10 - C3_10 | 112.3(10) | F1_8 - C2_8 - F3_8 | 107.3(14) |
| O1_10 - C1_10 - C2_10 | 109.0(11) | F1_8 - C2_8 - F2_8 | 106.0(14) |
| C3_10 - C1_10 - C2_10 | 108.2(10) | F3_8 - C2_8 - F2_8 | 108.0(15) |
| O1_10 - C1_10 - C4_10 | 109.6(10) | F1_8 - C2_8 - C1_8 | 114.0(12) |
| C3_10 - C1_10 - C4_10 | 109.9(9)  | F3_8 - C2_8 - C1_8 | 110.7(11) |
| C2_10 - C1_10 - C4_10 | 107.7(9)  | F2_8 - C2_8 - C1_8 | 110.6(13) |
| F2_10 - C2_10 - F3_10 | 108.3(14) | F4_8 - C3_8 - F6_8 | 107.9(13) |
| F2_10 - C2_10 - F1_10 | 103.9(14) | F4_8 - C3_8 - F5_8 | 107.4(14) |
| F3_10 - C2_10 - F1_10 | 105.3(13) | F6_8 - C3_8 - F5_8 | 105.9(15) |
| F2_10 - C2_10 - C1_10 | 114.5(12) | F4_8 - C3_8 - C1_8 | 112.1(11) |
| F3_10 - C2_10 - C1_10 | 113.1(12) | F6_8 - C3_8 - C1_8 | 113.4(12) |
| F1_10 - C2_10 - C1_10 | 110.9(12) | F5_8 - C3_8 - C1_8 | 109.8(12) |
| F4_10 - C3_10 - F5_10 | 106.9(14) | F7_8 - C4_8 - F8_8 | 109.7(14) |
| F4_10 - C3_10 - F6_10 | 108.1(14) | F7_8 - C4_8 - F9_8 | 106.5(14) |
| F5_10 - C3_10 - F6_10 | 105.9(13) | F8_8 - C4_8 - F9_8 | 107.4(15) |
| F4_10 - C3_10 - C1_10 | 111.8(11) | F7_8 - C4_8 - C1_8 | 108.7(11) |
| F5_10 - C3_10 - C1_10 | 110.9(12) | F8_8 - C4_8 - C1_8 | 112.7(12) |
| F6_10 - C3_10 - C1_10 | 112.8(11) | F9_8 - C4_8 - C1_8 | 111.7(12) |
| F8_10 - C4_10 - F9_10 | 110.1(12) | C1_7 - O1_7 - Al1  | 149.4(19) |
| F8_10 - C4_10 - F7_10 | 110.0(13) | O1_7 - C1_7 - C3_7 | 112.7(15) |
| F9_10 - C4_10 - F7_10 | 107.4(13) | O1_7 - C1_7 - C2_7 | 105.5(12) |
| F8_10 - C4_10 - C1_10 | 112.3(11) | C3_7 - C1_7 - C2_7 | 108.6(12) |
| F9_10 - C4_10 - C1_10 | 107.6(10) | O1_7 - C1_7 - C4_7 | 109.2(14) |
| F7_10 - C4_10 - C1_10 | 109.2(11) | C3_7 - C1_7 - C4_7 | 109.8(12) |
| C1_9 - O1_9 - Al1     | 153.6(13) | C2_7 - C1_7 - C4_7 | 110.9(11) |
| O1_9 - C1_9 - C3_9    | 111.1(11) | F3_7 - C2_7 - F2_7 | 109.4(14) |
| O1_9 - C1_9 - C2_9    | 110.6(12) | F3_7 - C2_7 - F1_7 | 105.2(16) |
| C3_9 - C1_9 - C2_9    | 107.1(10) | F2_7 - C2_7 - F1_7 | 108.2(17) |
| O1_9 - C1_9 - C4_9    | 111.6(12) | F3_7 - C2_7 - C1_7 | 112.0(13) |
| C3_9 - C1_9 - C4_9    | 109.1(11) | F2_7 - C2_7 - C1_7 | 110.3(13) |
| C2_9 - C1_9 - C4_9    | 107.2(10) | F1_7 - C2_7 - C1_7 | 111.4(15) |
| F3_9 - C2_9 - F2_9    | 109.8(15) | F4_7 - C3_7 - F6_7 | 107.7(16) |

|                    |           |                    |           |
|--------------------|-----------|--------------------|-----------|
| F4_7 - C3_7 - F5_7 | 107.1(17) | C3_3 - C1_3 - C2_3 | 109.4(9)  |
| F6_7 - C3_7 - F5_7 | 105.1(18) | F3_3 - C2_3 - F2_3 | 106.6(14) |
| F4_7 - C3_7 - C1_7 | 112.2(15) | F3_3 - C2_3 - F1_3 | 108.2(13) |
| F6_7 - C3_7 - C1_7 | 113.5(15) | F2_3 - C2_3 - F1_3 | 106.5(13) |
| F5_7 - C3_7 - C1_7 | 110.8(15) | F3_3 - C2_3 - C1_3 | 110.8(11) |
| F8_7 - C4_7 - F9_7 | 108.6(16) | F2_3 - C2_3 - C1_3 | 113.1(11) |
| F8_7 - C4_7 - F7_7 | 106.7(15) | F1_3 - C2_3 - C1_3 | 111.3(11) |
| F9_7 - C4_7 - F7_7 | 108.2(16) | F5_3 - C3_3 - F4_3 | 102.8(13) |
| F8_7 - C4_7 - C1_7 | 113.2(14) | F5_3 - C3_3 - F6_3 | 108.4(15) |
| F9_7 - C4_7 - C1_7 | 110.4(14) | F4_3 - C3_3 - F6_3 | 110.9(14) |
| F7_7 - C4_7 - C1_7 | 109.6(13) | F5_3 - C3_3 - C1_3 | 113.6(12) |
| F1_6 - C1_6 - C2_6 | 118.4(10) | F4_3 - C3_3 - C1_3 | 111.7(11) |
| F1_6 - C1_6 - C6_6 | 121.5(11) | F6_3 - C3_3 - C1_3 | 109.3(12) |
| C2_6 - C1_6 - C6_6 | 120.1(10) | F8_3 - C4_3 - F7_3 | 106.3(14) |
| F2_6 - C2_6 - C1_6 | 119.4(10) | F8_3 - C4_3 - F9_3 | 102.9(16) |
| F2_6 - C2_6 - C3_6 | 120.8(10) | F7_3 - C4_3 - F9_3 | 111.3(15) |
| C1_6 - C2_6 - C3_6 | 119.8(9)  | F8_3 - C4_3 - C1_3 | 114.5(13) |
| F3_6 - C3_6 - C4_6 | 119.7(9)  | F7_3 - C4_3 - C1_3 | 112.0(11) |
| F3_6 - C3_6 - C2_6 | 120.5(9)  | F9_3 - C4_3 - C1_3 | 109.5(11) |
| C4_6 - C3_6 - C2_6 | 119.8(9)  | C1_2 - O1_2 - Al2  | 161.3(13) |
| F4_6 - C4_6 - C3_6 | 119.1(9)  | O1_2 - C1_2 - C4_2 | 111.4(10) |
| F4_6 - C4_6 - C5_6 | 120.6(9)  | O1_2 - C1_2 - C2_2 | 110.4(10) |
| C3_6 - C4_6 - C5_6 | 120.3(9)  | C4_2 - C1_2 - C2_2 | 108.7(9)  |
| C6_6 - C5_6 - C4_6 | 119.8(11) | O1_2 - C1_2 - C3_2 | 107.6(11) |
| C5_6 - C6_6 - C1_6 | 120.2(12) | C4_2 - C1_2 - C3_2 | 108.8(9)  |
| C1_4 - O1_4 - Al2  | 151.8(15) | C2_2 - C1_2 - C3_2 | 110.0(9)  |
| O1_4 - C1_4 - C4_4 | 109.7(12) | F3_2 - C2_2 - F2_2 | 106.0(14) |
| O1_4 - C1_4 - C3_4 | 109.0(12) | F3_2 - C2_2 - F1_2 | 106.1(13) |
| C4_4 - C1_4 - C3_4 | 111.3(12) | F2_2 - C2_2 - F1_2 | 107.3(13) |
| O1_4 - C1_4 - C2_4 | 113.2(13) | F3_2 - C2_2 - C1_2 | 112.1(11) |
| C4_4 - C1_4 - C2_4 | 107.8(11) | F2_2 - C2_2 - C1_2 | 112.2(12) |
| C3_4 - C1_4 - C2_4 | 105.8(11) | F1_2 - C2_2 - C1_2 | 112.7(12) |
| F3_4 - C2_4 - F1_4 | 116.5(17) | F5_2 - C3_2 - F4_2 | 107.8(12) |
| F3_4 - C2_4 - F2_4 | 109.4(17) | F5_2 - C3_2 - F6_2 | 107.1(12) |
| F1_4 - C2_4 - F2_4 | 101.7(16) | F4_2 - C3_2 - F6_2 | 107.8(12) |
| F3_4 - C2_4 - C1_4 | 108.0(13) | F5_2 - C3_2 - C1_2 | 110.9(10) |
| F1_4 - C2_4 - C1_4 | 113.3(14) | F4_2 - C3_2 - C1_2 | 110.5(11) |
| F2_4 - C2_4 - C1_4 | 107.4(15) | F6_2 - C3_2 - C1_2 | 112.6(10) |
| F4_4 - C3_4 - F6_4 | 107.0(16) | F8_2 - C4_2 - F9_2 | 107.8(11) |
| F4_4 - C3_4 - F5_4 | 110.9(19) | F8_2 - C4_2 - F7_2 | 106.7(13) |
| F6_4 - C3_4 - F5_4 | 105.7(17) | F9_2 - C4_2 - F7_2 | 106.3(13) |
| F4_4 - C3_4 - C1_4 | 109.7(15) | F8_2 - C4_2 - C1_2 | 112.5(10) |
| F6_4 - C3_4 - C1_4 | 115.3(14) | F9_2 - C4_2 - C1_2 | 112.2(10) |
| F5_4 - C3_4 - C1_4 | 108.2(15) | F7_2 - C4_2 - C1_2 | 110.9(11) |
| F8_4 - C4_4 - F7_4 | 115.5(16) | C1 - Ta1 - C3      | 111.8(3)  |
| F8_4 - C4_4 - F9_4 | 100.6(17) | C1 - Ta1 - C5      | 113.5(3)  |
| F7_4 - C4_4 - F9_4 | 104.9(17) | C3 - Ta1 - C5      | 110.9(3)  |
| F8_4 - C4_4 - C1_4 | 114.2(13) | C1 - Ta1 - C2      | 79.7(3)   |
| F7_4 - C4_4 - C1_4 | 111.6(12) | C3 - Ta1 - C2      | 77.7(3)   |
| F9_4 - C4_4 - C1_4 | 108.8(14) | C5 - Ta1 - C2      | 157.9(3)  |
| C1_3 - O1_3 - Al2  | 156.9(16) | C1 - Ta1 - C4      | 156.5(3)  |
| O1_3 - C1_3 - C4_3 | 109.7(12) | C3 - Ta1 - C4      | 80.9(3)   |
| O1_3 - C1_3 - C3_3 | 109.4(12) | C5 - Ta1 - C4      | 77.5(3)   |
| C4_3 - C1_3 - C3_3 | 107.7(10) | C2 - Ta1 - C4      | 84.2(3)   |
| O1_3 - C1_3 - C2_3 | 110.4(12) | C1 - Ta1 - C6      | 75.9(3)   |
| C4_3 - C1_3 - C2_3 | 110.2(10) | C3 - Ta1 - C6      | 160.7(3)  |

|                 |            |                     |            |
|-----------------|------------|---------------------|------------|
| C5 - Ta1 - C6   | 79.9(3)    | Ag3 - Ag1 - Ag5     | 89.36(3)   |
| C2 - Ta1 - C6   | 86.8(3)    | Ag2 - Ag1 - Ag5     | 59.38(3)   |
| C4 - Ta1 - C6   | 86.3(3)    | C1 - Ag1 - Ta1      | 44.25(19)  |
| C1 - Ta1 - Ag1  | 58.4(2)    | C24 - Ag1 - Ta1     | 136.7(2)   |
| C3 - Ta1 - Ag1  | 60.1(2)    | C3 - Ag1 - Ta1      | 43.96(19)  |
| C5 - Ta1 - Ag1  | 108.2(2)   | C23 - Ag1 - Ta1     | 134.1(2)   |
| C2 - Ta1 - Ag1  | 93.8(2)    | Ag4 - Ag1 - Ta1     | 122.03(4)  |
| C4 - Ta1 - Ag1  | 140.3(2)   | Ag3 - Ag1 - Ta1     | 61.142(19) |
| C6 - Ta1 - Ag1  | 133.3(2)   | Ag2 - Ag1 - Ta1     | 60.76(2)   |
| C1 - Ta1 - Ag2  | 60.0(2)    | Ag5 - Ag1 - Ta1     | 120.14(3)  |
| C3 - Ta1 - Ag2  | 107.5(2)   | C1 - Ag1 - Ta4      | 133.62(19) |
| C5 - Ta1 - Ag2  | 59.9(2)    | C24 - Ag1 - Ta4     | 43.5(2)    |
| C2 - Ta1 - Ag2  | 138.6(2)   | C3 - Ag1 - Ta4      | 136.5(2)   |
| C4 - Ta1 - Ag2  | 137.0(2)   | C23 - Ag1 - Ta4     | 43.9(2)    |
| C6 - Ta1 - Ag2  | 91.6(2)    | Ag4 - Ag1 - Ta4     | 61.10(4)   |
| Ag1 - Ta1 - Ag2 | 58.63(2)   | Ag3 - Ag1 - Ta4     | 122.00(2)  |
| C1 - Ta1 - Ag3  | 106.9(2)   | Ag2 - Ag1 - Ta4     | 120.86(3)  |
| C3 - Ta1 - Ag3  | 59.0(2)    | Ag5 - Ag1 - Ta4     | 61.51(2)   |
| C5 - Ta1 - Ag3  | 59.6(2)    | Ta1 - Ag1 - Ta4     | 176.80(2)  |
| C2 - Ta1 - Ag3  | 135.8(2)   | O1_7 - Al1 - O1_8   | 111.6(12)  |
| C4 - Ta1 - Ag3  | 96.6(2)    | O1_7 - Al1 - O1_1   | 118.8(10)  |
| C6 - Ta1 - Ag3  | 137.4(2)   | O1_8 - Al1 - O1_1   | 98.4(7)    |
| Ag1 - Ta1 - Ag3 | 58.39(4)   | O1_18 - Al1 - O1_1  | 102.9(7)   |
| Ag2 - Ta1 - Ag3 | 58.04(2)   | O1_18 - Al1 - O1_19 | 113.9(9)   |
| O1 - C1 - Ta1   | 167.3(7)   | O1_1 - Al1 - O1_19  | 118.9(6)   |
| O1 - C1 - Ag1   | 113.9(6)   | O1_18 - Al1 - O1_21 | 107.4(11)  |
| Ta1 - C1 - Ag1  | 77.3(3)    | O1_1 - Al1 - O1_21  | 102.4(9)   |
| O1 - C1 - Ag2   | 113.0(7)   | O1_19 - Al1 - O1_21 | 110.1(12)  |
| Ta1 - C1 - Ag2  | 76.1(3)    | O1_7 - Al1 - O1_9   | 110.2(10)  |
| Ag1 - C1 - Ag2  | 67.4(2)    | O1_8 - Al1 - O1_9   | 102.2(9)   |
| C1 - Ag1 - C24  | 154.5(3)   | O1_1 - Al1 - O1_9   | 113.8(7)   |
| C1 - Ag1 - C3   | 84.2(3)    | O1_1 - Al1 - O1_22  | 100.0(16)  |
| C24 - Ag1 - C3  | 92.9(3)    | C8 - Ta2 - C12      | 114.1(3)   |
| C1 - Ag1 - C23  | 89.9(3)    | C8 - Ta2 - C7       | 111.8(3)   |
| C24 - Ag1 - C23 | 84.0(3)    | C12 - Ta2 - C7      | 111.4(4)   |
| C3 - Ag1 - C23  | 159.5(3)   | C8 - Ta2 - C10      | 78.7(3)    |
| C1 - Ag1 - Ag4  | 148.4(2)   | C12 - Ta2 - C10     | 78.3(4)    |
| C24 - Ag1 - Ag4 | 57.08(18)  | C7 - Ta2 - C10      | 158.9(4)   |
| C3 - Ag1 - Ag4  | 99.36(19)  | C8 - Ta2 - C9       | 77.0(4)    |
| C23 - Ag1 - Ag4 | 95.9(2)    | C12 - Ta2 - C9      | 157.4(4)   |
| C1 - Ag1 - Ag3  | 97.5(2)    | C7 - Ta2 - C9       | 79.9(4)    |
| C24 - Ag1 - Ag3 | 101.96(18) | C10 - Ta2 - C9      | 85.1(4)    |
| C3 - Ag1 - Ag3  | 56.21(19)  | C8 - Ta2 - C11      | 155.3(3)   |
| C23 - Ag1 - Ag3 | 144.21(19) | C12 - Ta2 - C11     | 80.3(3)    |
| Ag4 - Ag1 - Ag3 | 60.92(3)   | C7 - Ta2 - C11      | 78.4(4)    |
| C1 - Ag1 - Ag2  | 57.3(2)    | C10 - Ta2 - C11     | 85.2(4)    |
| C24 - Ag1 - Ag2 | 148.02(18) | C9 - Ta2 - C11      | 83.1(4)    |
| C3 - Ag1 - Ag2  | 96.2(2)    | C8 - Ta2 - Ag2      | 59.8(2)    |
| C23 - Ag1 - Ag2 | 97.07(19)  | C12 - Ta2 - Ag2     | 108.6(2)   |
| Ag4 - Ag1 - Ag2 | 91.15(3)   | C7 - Ta2 - Ag2      | 59.1(2)    |
| Ag3 - Ag1 - Ag2 | 59.65(2)   | C10 - Ta2 - Ag2     | 137.4(3)   |
| C1 - Ag1 - Ag5  | 99.2(2)    | C9 - Ta2 - Ag2      | 94.0(3)    |
| C24 - Ag1 - Ag5 | 97.41(19)  | C11 - Ta2 - Ag2     | 137.1(2)   |
| C3 - Ag1 - Ag5  | 145.46(19) | C8 - Ta2 - Ag6      | 57.9(2)    |
| C23 - Ag1 - Ag5 | 54.86(19)  | C12 - Ta2 - Ag6     | 62.6(2)    |
| Ag4 - Ag1 - Ag5 | 60.67(3)   | C7 - Ta2 - Ag6      | 108.4(2)   |

|                 |            |                     |           |
|-----------------|------------|---------------------|-----------|
| C10 - Ta2 - Ag6 | 92.7(3)    | Ag1 - Ag2 - Ta2     | 122.16(4) |
| C9 - Ta2 - Ag6  | 134.3(3)   | Ta1 - Ag2 - Ta2     | 177.13(2) |
| C11 - Ta2 - Ag6 | 142.4(2)   | O1_12 - Al2 - O1_2  | 115.7(8)  |
| Ag2 - Ta2 - Ag6 | 58.37(3)   | O1_11 - Al2 - O1_15 | 113.2(10) |
| C8 - Ta2 - Ag5  | 105.5(2)   | O1_12 - Al2 - O1_3  | 112.1(9)  |
| C12 - Ta2 - Ag5 | 58.3(2)    | O1_2 - Al2 - O1_3   | 104.3(10) |
| C7 - Ta2 - Ag5  | 62.2(2)    | O1_12 - Al2 - O1_4  | 106.6(9)  |
| C10 - Ta2 - Ag5 | 134.5(3)   | O1_2 - Al2 - O1_4   | 114.2(10) |
| C9 - Ta2 - Ag5  | 140.3(3)   | O1_3 - Al2 - O1_4   | 103.3(10) |
| C11 - Ta2 - Ag5 | 99.2(2)    | O1_11 - Al2 - O1_20 | 99.9(12)  |
| Ag2 - Ta2 - Ag5 | 57.68(3)   | O1_15 - Al2 - O1_20 | 109.5(14) |
| Ag6 - Ta2 - Ag5 | 57.07(3)   | O1_11 - Al2 - O1_10 | 109.3(7)  |
| O2 - C2 - Ta1   | 178.2(8)   | O1_15 - Al2 - O1_10 | 114.2(9)  |
| C7 - Ag2 - C8   | 83.7(3)    | O1_20 - Al2 - O1_10 | 109.8(12) |
| C7 - Ag2 - C5   | 153.1(3)   | C18 - Ta3 - C14     | 110.6(3)  |
| C8 - Ag2 - C5   | 90.9(3)    | C18 - Ta3 - C13     | 113.9(3)  |
| C7 - Ag2 - C1   | 92.1(3)    | C14 - Ta3 - C13     | 111.6(4)  |
| C8 - Ag2 - C1   | 160.3(3)   | C18 - Ta3 - C16     | 159.9(3)  |
| C5 - Ag2 - C1   | 84.1(3)    | C14 - Ta3 - C16     | 77.3(4)   |
| C7 - Ag2 - Ag5  | 59.8(2)    | C13 - Ta3 - C16     | 78.0(3)   |
| C8 - Ag2 - Ag5  | 95.9(2)    | C18 - Ta3 - C15     | 75.7(4)   |
| C5 - Ag2 - Ag5  | 147.1(2)   | C14 - Ta3 - C15     | 81.0(4)   |
| C1 - Ag2 - Ag5  | 98.61(18)  | C13 - Ta3 - C15     | 157.8(3)  |
| C7 - Ag2 - Ag3  | 149.8(2)   | C16 - Ta3 - C15     | 87.7(4)   |
| C8 - Ag2 - Ag3  | 96.8(2)    | C18 - Ta3 - C17     | 80.4(3)   |
| C5 - Ag2 - Ag3  | 56.9(2)    | C14 - Ta3 - C17     | 157.1(3)  |
| C1 - Ag2 - Ag3  | 96.4(2)    | C13 - Ta3 - C17     | 79.8(3)   |
| Ag5 - Ag2 - Ag3 | 90.27(3)   | C16 - Ta3 - C17     | 86.3(4)   |
| C7 - Ag2 - Ag6  | 98.0(2)    | C15 - Ta3 - C17     | 82.5(4)   |
| C8 - Ag2 - Ag6  | 55.22(19)  | C18 - Ta3 - Ag4     | 60.6(2)   |
| C5 - Ag2 - Ag6  | 100.42(19) | C14 - Ta3 - Ag4     | 109.6(2)  |
| C1 - Ag2 - Ag6  | 144.47(19) | C13 - Ta3 - Ag4     | 58.6(2)   |
| Ag5 - Ag2 - Ag6 | 59.20(4)   | C16 - Ta3 - Ag4     | 135.8(3)  |
| Ag3 - Ag2 - Ag6 | 59.59(3)   | C15 - Ta3 - Ag4     | 136.1(3)  |
| C7 - Ag2 - Ag1  | 103.1(2)   | C17 - Ta3 - Ag4     | 93.3(2)   |
| C8 - Ag2 - Ag1  | 144.41(19) | C18 - Ta3 - Ag6     | 107.5(2)  |
| C5 - Ag2 - Ag1  | 96.6(2)    | C14 - Ta3 - Ag6     | 60.8(2)   |
| C1 - Ag2 - Ag1  | 55.31(19)  | C13 - Ta3 - Ag6     | 57.9(2)   |
| Ag5 - Ag2 - Ag1 | 60.50(2)   | C16 - Ta3 - Ag6     | 92.5(3)   |
| Ag3 - Ag2 - Ag1 | 60.11(3)   | C15 - Ta3 - Ag6     | 140.6(3)  |
| Ag6 - Ag2 - Ag1 | 89.19(3)   | C17 - Ta3 - Ag6     | 136.8(2)  |
| C7 - Ag2 - Ta1  | 135.7(2)   | Ag4 - Ta3 - Ag6     | 58.88(3)  |
| C8 - Ag2 - Ta1  | 134.8(2)   | C18 - Ta3 - Ag3     | 59.0(2)   |
| C5 - Ag2 - Ta1  | 43.93(19)  | C14 - Ta3 - Ag3     | 60.2(2)   |
| C1 - Ag2 - Ta1  | 43.88(19)  | C13 - Ta3 - Ag3     | 105.6(2)  |
| Ag5 - Ag2 - Ta1 | 121.09(3)  | C16 - Ta3 - Ag3     | 135.8(3)  |
| Ag3 - Ag2 - Ta1 | 61.24(3)   | C15 - Ta3 - Ag3     | 96.5(3)   |
| Ag6 - Ag2 - Ta1 | 120.82(3)  | C17 - Ta3 - Ag3     | 137.9(2)  |
| Ag1 - Ag2 - Ta1 | 60.60(3)   | Ag4 - Ta3 - Ag3     | 58.76(3)  |
| C7 - Ag2 - Ta2  | 44.2(2)    | Ag6 - Ta3 - Ag3     | 57.65(3)  |
| C8 - Ag2 - Ta2  | 43.7(2)    | O3 - C3 - Ta1       | 168.3(7)  |
| C5 - Ag2 - Ta2  | 134.4(2)   | O3 - C3 - Ag3       | 113.6(6)  |
| C1 - Ag2 - Ta2  | 136.29(19) | Ta1 - C3 - Ag3      | 77.1(3)   |
| Ag5 - Ag2 - Ta2 | 61.66(2)   | O3 - C3 - Ag1       | 112.0(6)  |
| Ag3 - Ag2 - Ta2 | 120.43(3)  | Ta1 - C3 - Ag1      | 76.0(3)   |
| Ag6 - Ag2 - Ta2 | 60.93(2)   | Ag3 - C3 - Ag1      | 66.8(2)   |

|                 |            |                 |            |
|-----------------|------------|-----------------|------------|
| C3 - Ag3 - C18  | 89.6(3)    | C22 - Ta4 - C21 | 79.0(3)    |
| C3 - Ag3 - C5   | 83.1(3)    | C23 - Ta4 - C21 | 80.1(4)    |
| C18 - Ag3 - C5  | 155.6(3)   | C20 - Ta4 - C21 | 84.7(4)    |
| C3 - Ag3 - C14  | 155.4(3)   | C19 - Ta4 - C21 | 84.9(4)    |
| C18 - Ag3 - C14 | 82.4(3)    | C24 - Ta4 - Ag4 | 59.5(2)    |
| C5 - Ag3 - C14  | 94.7(3)    | C22 - Ta4 - Ag4 | 61.6(2)    |
| C3 - Ag3 - Ag6  | 146.8(2)   | C23 - Ta4 - Ag4 | 106.0(2)   |
| C18 - Ag3 - Ag6 | 97.7(2)    | C20 - Ta4 - Ag4 | 93.2(3)    |
| C5 - Ag3 - Ag6  | 101.1(2)   | C19 - Ta4 - Ag4 | 135.0(2)   |
| C14 - Ag3 - Ag6 | 57.8(2)    | C21 - Ta4 - Ag4 | 140.1(3)   |
| C3 - Ag3 - Ag2  | 97.1(2)    | C24 - Ta4 - Ag1 | 59.2(2)    |
| C18 - Ag3 - Ag2 | 147.4(2)   | C22 - Ta4 - Ag1 | 109.1(2)   |
| C5 - Ag3 - Ag2  | 56.9(2)    | C23 - Ta4 - Ag1 | 60.2(2)    |
| C14 - Ag3 - Ag2 | 102.1(2)   | C20 - Ta4 - Ag1 | 135.0(3)   |
| Ag6 - Ag3 - Ag2 | 60.49(3)   | C19 - Ta4 - Ag1 | 91.0(2)    |
| C3 - Ag3 - Ag1  | 57.0(2)    | C21 - Ta4 - Ag1 | 140.1(3)   |
| C18 - Ag3 - Ag1 | 98.70(19)  | Ag4 - Ta4 - Ag1 | 57.514(19) |
| C5 - Ag3 - Ag1  | 96.70(19)  | C24 - Ta4 - Ag5 | 107.7(2)   |
| C14 - Ag3 - Ag1 | 147.2(2)   | C22 - Ta4 - Ag5 | 60.8(2)    |
| Ag6 - Ag3 - Ag1 | 89.78(3)   | C23 - Ta4 - Ag5 | 57.2(2)    |
| Ag2 - Ag3 - Ag1 | 60.24(4)   | C20 - Ta4 - Ag5 | 137.5(3)   |
| C3 - Ag3 - Ag4  | 98.34(18)  | C19 - Ta4 - Ag5 | 134.2(3)   |
| C18 - Ag3 - Ag4 | 57.2(2)    | C21 - Ta4 - Ag5 | 97.8(3)    |
| C5 - Ag3 - Ag4  | 146.9(2)   | Ag4 - Ta4 - Ag5 | 58.408(18) |
| C14 - Ag3 - Ag4 | 96.8(2)    | Ag1 - Ta4 - Ag5 | 58.34(2)   |
| Ag6 - Ag3 - Ag4 | 60.54(3)   | C13 - Ag4 - C24 | 157.7(3)   |
| Ag2 - Ag3 - Ag4 | 90.23(3)   | C13 - Ag4 - C18 | 85.3(3)    |
| Ag1 - Ag3 - Ag4 | 58.76(2)   | C24 - Ag4 - C18 | 93.2(3)    |
| C3 - Ag3 - Ta1  | 43.9(2)    | C13 - Ag4 - C22 | 90.1(3)    |
| C18 - Ag3 - Ta1 | 133.47(19) | C24 - Ag4 - C22 | 83.0(3)    |
| C5 - Ag3 - Ta1  | 43.77(19)  | C18 - Ag4 - C22 | 157.7(3)   |
| C14 - Ag3 - Ta1 | 138.4(2)   | C13 - Ag4 - Ag1 | 145.3(2)   |
| Ag6 - Ag3 - Ta1 | 121.21(3)  | C24 - Ag4 - Ag1 | 56.87(18)  |
| Ag2 - Ag3 - Ta1 | 60.72(3)   | C18 - Ag4 - Ag1 | 98.91(18)  |
| Ag1 - Ag3 - Ta1 | 60.47(3)   | C22 - Ag4 - Ag1 | 97.3(2)    |
| Ag4 - Ag3 - Ta1 | 119.21(4)  | C13 - Ag4 - Ag5 | 96.7(2)    |
| C3 - Ag3 - Ta3  | 133.4(2)   | C24 - Ag4 - Ag5 | 97.30(19)  |
| C18 - Ag3 - Ta3 | 43.82(19)  | C18 - Ag4 - Ag5 | 144.76(18) |
| C5 - Ag3 - Ta3  | 138.29(19) | C22 - Ag4 - Ag5 | 57.5(2)    |
| C14 - Ag3 - Ta3 | 43.6(2)    | Ag1 - Ag4 - Ag5 | 60.70(3)   |
| Ag6 - Ag3 - Ta3 | 61.11(2)   | C13 - Ag4 - Ag3 | 96.1(2)    |
| Ag2 - Ag3 - Ta3 | 121.60(3)  | C24 - Ag4 - Ag3 | 101.36(18) |
| Ag1 - Ag3 - Ta3 | 118.95(3)  | C18 - Ag4 - Ag3 | 55.86(18)  |
| Ag4 - Ag3 - Ta3 | 60.20(4)   | C22 - Ag4 - Ag3 | 146.5(2)   |
| Ta1 - Ag3 - Ta3 | 177.27(3)  | Ag1 - Ag4 - Ag3 | 60.32(4)   |
| C24 - Ta4 - C22 | 113.6(3)   | Ag5 - Ag4 - Ag3 | 89.05(3)   |
| C24 - Ta4 - C23 | 113.3(3)   | C13 - Ag4 - Ag6 | 55.5(2)    |
| C22 - Ta4 - C23 | 109.9(4)   | C24 - Ag4 - Ag6 | 146.50(18) |
| C24 - Ta4 - C20 | 76.9(3)    | C18 - Ag4 - Ag6 | 95.78(19)  |
| C22 - Ta4 - C20 | 78.4(4)    | C22 - Ag4 - Ag6 | 99.5(2)    |
| C23 - Ta4 - C20 | 160.7(4)   | Ag1 - Ag4 - Ag6 | 89.82(3)   |
| C24 - Ta4 - C19 | 77.2(3)    | Ag5 - Ag4 - Ag6 | 58.65(4)   |
| C22 - Ta4 - C19 | 159.9(3)   | Ag3 - Ag4 - Ag6 | 59.05(2)   |
| C23 - Ta4 - C19 | 78.7(4)    | C13 - Ag4 - Ta3 | 44.5(2)    |
| C20 - Ta4 - C19 | 88.2(4)    | C24 - Ag4 - Ta3 | 137.0(2)   |
| C24 - Ta4 - C21 | 154.5(4)   | C18 - Ag4 - Ta3 | 43.88(19)  |

|                 |            |                 |            |
|-----------------|------------|-----------------|------------|
| C22 - Ag4 - Ta3 | 134.4(2)   | C13 - Ag6 - Ag3 | 97.3(2)    |
| Ag1 - Ag4 - Ta3 | 121.35(3)  | C14 - Ag6 - Ag3 | 57.2(2)    |
| Ag5 - Ag4 - Ta3 | 119.54(4)  | Ag5 - Ag6 - Ag3 | 90.97(3)   |
| Ag3 - Ag4 - Ta3 | 61.04(2)   | C8 - Ag6 - Ag2  | 57.26(19)  |
| Ag6 - Ag4 - Ta3 | 60.918(18) | C13 - Ag6 - Ag2 | 145.6(2)   |
| C13 - Ag4 - Ta4 | 133.6(2)   | C14 - Ag6 - Ag2 | 101.3(2)   |
| C24 - Ag4 - Ta4 | 43.6(2)    | Ag5 - Ag6 - Ag2 | 60.04(3)   |
| C18 - Ag4 - Ta4 | 136.80(19) | Ag3 - Ag6 - Ag2 | 59.92(3)   |
| C22 - Ag4 - Ta4 | 43.6(2)    | C8 - Ag6 - Ag4  | 147.10(19) |
| Ag1 - Ag4 - Ta4 | 61.39(3)   | C13 - Ag6 - Ag4 | 55.8(2)    |
| Ag5 - Ag4 - Ta4 | 61.62(3)   | C14 - Ag6 - Ag4 | 96.3(2)    |
| Ag3 - Ag4 - Ta4 | 121.71(3)  | Ag5 - Ag6 - Ag4 | 60.56(2)   |
| Ag6 - Ag4 - Ta4 | 120.26(2)  | Ag3 - Ag6 - Ag4 | 60.41(4)   |
| Ta3 - Ag4 - Ta4 | 177.25(2)  | Ag2 - Ag6 - Ag4 | 89.84(3)   |
| O4 - C4 - Ta1   | 177.5(8)   | C8 - Ag6 - Ta2  | 43.9(2)    |
| C23 - Ag5 - C12 | 152.6(3)   | C13 - Ag6 - Ta2 | 135.7(2)   |
| C23 - Ag5 - Ag6 | 147.3(2)   | C14 - Ag6 - Ta2 | 134.9(2)   |
| C12 - Ag5 - Ag6 | 60.1(2)    | Ag5 - Ag6 - Ta2 | 61.85(3)   |
| C23 - Ag5 - Ag2 | 99.5(2)    | Ag3 - Ag6 - Ta2 | 120.54(3)  |
| C12 - Ag5 - Ag2 | 98.5(2)    | Ag2 - Ag6 - Ta2 | 60.70(3)   |
| Ag6 - Ag5 - Ag2 | 60.76(2)   | Ag4 - Ag6 - Ta2 | 122.41(4)  |
| C23 - Ag5 - Ag4 | 96.3(2)    | C8 - Ag6 - Ta3  | 134.7(2)   |
| C12 - Ag5 - Ag4 | 104.2(2)   | C13 - Ag6 - Ta3 | 44.3(2)    |
| Ag6 - Ag5 - Ag4 | 60.79(3)   | C14 - Ag6 - Ta3 | 43.6(2)    |
| Ag2 - Ag5 - Ag4 | 90.38(3)   | Ag5 - Ag6 - Ta3 | 120.74(4)  |
| C23 - Ag5 - Ag1 | 57.5(2)    | Ag3 - Ag6 - Ta3 | 61.23(3)   |
| C12 - Ag5 - Ag1 | 149.8(2)   | Ag2 - Ag6 - Ta3 | 121.15(3)  |
| Ag6 - Ag5 - Ag1 | 89.86(3)   | Ag4 - Ag6 - Ta3 | 60.20(3)   |
| Ag2 - Ag5 - Ag1 | 60.12(3)   | Ta2 - Ag6 - Ta3 | 177.21(2)  |
| Ag4 - Ag5 - Ag1 | 58.63(3)   | O6 - C6 - Ta1   | 176.1(8)   |
| C23 - Ag5 - Ta2 | 134.9(2)   | O9 - C9 - Ta2   | 179.5(11)  |
| C12 - Ag5 - Ta2 | 43.6(2)    | O8 - C8 - Ta2   | 167.8(7)   |
| Ag6 - Ag5 - Ta2 | 61.080(18) | O8 - C8 - Ag6   | 111.6(6)   |
| Ag2 - Ag5 - Ta2 | 60.66(2)   | Ta2 - C8 - Ag6  | 78.2(3)    |
| Ag4 - Ag5 - Ta2 | 121.87(4)  | O8 - C8 - Ag2   | 113.4(6)   |
| Ag1 - Ag5 - Ta2 | 120.78(4)  | Ta2 - C8 - Ag2  | 76.5(3)    |
| C23 - Ag5 - Ta4 | 43.9(2)    | Ag6 - C8 - Ag2  | 67.5(2)    |
| C12 - Ag5 - Ta4 | 136.5(2)   | O7 - C7 - Ta2   | 167.5(8)   |
| Ag6 - Ag5 - Ta4 | 120.75(3)  | O7 - C7 - Ag2   | 113.2(7)   |
| Ag2 - Ag5 - Ta4 | 120.23(3)  | Ta2 - C7 - Ag2  | 76.7(3)    |
| Ag4 - Ag5 - Ta4 | 59.97(3)   | O13 - C13 - Ta3 | 167.4(7)   |
| Ag1 - Ag5 - Ta4 | 60.14(3)   | O13 - C13 - Ag6 | 111.5(6)   |
| Ta2 - Ag5 - Ta4 | 178.14(3)  | Ta3 - C13 - Ag6 | 77.8(3)    |
| O5 - C5 - Ta1   | 167.6(7)   | O13 - C13 - Ag4 | 113.8(7)   |
| O5 - C5 - Ag3   | 112.9(6)   | Ta3 - C13 - Ag4 | 77.0(3)    |
| Ta1 - C5 - Ag3  | 76.6(3)    | Ag6 - C13 - Ag4 | 68.7(2)    |
| O5 - C5 - Ag2   | 114.4(7)   | O12 - C12 - Ta2 | 168.4(8)   |
| Ta1 - C5 - Ag2  | 76.1(3)    | O12 - C12 - Ag5 | 112.8(7)   |
| Ag3 - C5 - Ag2  | 66.14(19)  | Ta2 - C12 - Ag5 | 78.1(3)    |
| C8 - Ag6 - C13  | 157.1(3)   | O11 - C11 - Ta2 | 177.2(8)   |
| C8 - Ag6 - C14  | 91.1(3)    | O10 - C10 - Ta2 | 178.8(9)   |
| C13 - Ag6 - C14 | 83.6(3)    | O16 - C16 - Ta3 | 176.7(9)   |
| C8 - Ag6 - Ag5  | 97.9(2)    | O15 - C15 - Ta3 | 175.9(9)   |
| C13 - Ag6 - Ag5 | 98.3(2)    | O14 - C14 - Ta3 | 168.2(7)   |
| C14 - Ag6 - Ag5 | 147.9(2)   | O14 - C14 - Ag3 | 113.9(7)   |
| C8 - Ag6 - Ag3  | 98.46(19)  | Ta3 - C14 - Ag3 | 76.2(3)    |

|                       |           |                       |           |
|-----------------------|-----------|-----------------------|-----------|
| O14 - C14 - Ag6       | 113.6(7)  | C1_18 - O1_18 - Al1   | 144.1(11) |
| Ta3 - C14 - Ag6       | 75.6(3)   | O1_18 - C1_18 - C3_18 | 111.4(12) |
| Ag3 - C14 - Ag6       | 65.0(2)   | O1_18 - C1_18 - C4_18 | 110.7(11) |
| O20 - C20 - Ta4       | 178.8(10) | C3_18 - C1_18 - C4_18 | 109.2(11) |
| O21 - C21 - Ta4       | 178.9(9)  | O1_18 - C1_18 - C2_18 | 107.0(11) |
| O22 - C22 - Ta4       | 168.8(7)  | C3_18 - C1_18 - C2_18 | 108.2(11) |
| O22 - C22 - Ag4       | 114.5(6)  | C4_18 - C1_18 - C2_18 | 110.3(11) |
| Ta4 - C22 - Ag4       | 74.8(3)   | F2_18 - C2_18 - F1_18 | 108.1(16) |
| O23 - C23 - Ta4       | 167.9(7)  | F2_18 - C2_18 - F3_18 | 108.4(16) |
| O23 - C23 - Ag5       | 111.8(6)  | F1_18 - C2_18 - F3_18 | 106.3(18) |
| Ta4 - C23 - Ag5       | 78.9(3)   | F2_18 - C2_18 - C1_18 | 114.6(13) |
| O23 - C23 - Ag1       | 112.9(6)  | F1_18 - C2_18 - C1_18 | 110.7(13) |
| Ta4 - C23 - Ag1       | 75.9(3)   | F3_18 - C2_18 - C1_18 | 108.4(13) |
| Ag5 - C23 - Ag1       | 67.7(2)   | F4_18 - C3_18 - F6_18 | 110.4(18) |
| O24 - C24 - Ta4       | 166.0(7)  | F4_18 - C3_18 - F5_18 | 103.8(17) |
| O24 - C24 - Ag1       | 114.1(6)  | F6_18 - C3_18 - F5_18 | 108.0(17) |
| Ta4 - C24 - Ag1       | 77.3(3)   | F4_18 - C3_18 - C1_18 | 112.3(14) |
| O24 - C24 - Ag4       | 114.7(6)  | F6_18 - C3_18 - C1_18 | 109.4(14) |
| Ta4 - C24 - Ag4       | 76.9(3)   | F5_18 - C3_18 - C1_18 | 112.7(15) |
| Ag1 - C24 - Ag4       | 66.05(19) | F9_18 - C4_18 - F8_18 | 105.3(15) |
| O19 - C19 - Ta4       | 178.7(10) | F9_18 - C4_18 - F7_18 | 111.7(17) |
| O18 - C18 - Ta3       | 168.0(7)  | F8_18 - C4_18 - F7_18 | 106.3(15) |
| O18 - C18 - Ag3       | 112.3(6)  | F9_18 - C4_18 - C1_18 | 109.4(13) |
| Ta3 - C18 - Ag3       | 77.2(3)   | F8_18 - C4_18 - C1_18 | 115.6(13) |
| O18 - C18 - Ag4       | 114.5(6)  | F7_18 - C4_18 - C1_18 | 108.4(13) |
| Ta3 - C18 - Ag4       | 75.5(3)   | C1_19 - O1_19 - Al1   | 148.3(13) |
| Ag3 - C18 - Ag4       | 67.0(2)   | O1_19 - C1_19 - C4_19 | 111.9(13) |
| O17 - C17 - Ta3       | 178.5(8)  | O1_19 - C1_19 - C3_19 | 105.0(11) |
| F1_16 - C1_16 - C6_16 | 120.6(15) | C4_19 - C1_19 - C3_19 | 110.0(11) |
| F1_16 - C1_16 - C2_16 | 119.7(15) | O1_19 - C1_19 - C2_19 | 113.9(13) |
| C6_16 - C1_16 - C2_16 | 119.7(14) | C4_19 - C1_19 - C2_19 | 107.5(11) |
| F2_16 - C2_16 - C1_16 | 119.5(14) | C3_19 - C1_19 - C2_19 | 108.6(11) |
| F2_16 - C2_16 - C3_16 | 120.6(15) | F2_19 - C2_19 - F3_19 | 107.4(17) |
| C1_16 - C2_16 - C3_16 | 119.9(14) | F2_19 - C2_19 - F1_19 | 111.7(16) |
| F3_16 - C3_16 - C2_16 | 121.5(15) | F3_19 - C2_19 - F1_19 | 105.9(17) |
| F3_16 - C3_16 - C4_16 | 118.3(15) | F2_19 - C2_19 - C1_19 | 111.6(15) |
| C2_16 - C3_16 - C4_16 | 120.2(13) | F3_19 - C2_19 - C1_19 | 110.3(15) |
| F4_16 - C4_16 - C5_16 | 121.6(16) | F1_19 - C2_19 - C1_19 | 109.8(14) |
| F4_16 - C4_16 - C3_16 | 118.4(15) | F4_19 - C3_19 - F6_19 | 107.1(15) |
| C5_16 - C4_16 - C3_16 | 120.0(14) | F4_19 - C3_19 - F5_19 | 107.3(17) |
| C4_16 - C5_16 - C6_16 | 119.7(17) | F6_19 - C3_19 - F5_19 | 107.3(17) |
| C1_16 - C6_16 - C5_16 | 120.6(16) | F4_19 - C3_19 - C1_19 | 113.0(13) |
| F1_17 - C1_17 - C2_17 | 118.9(17) | F6_19 - C3_19 - C1_19 | 111.8(14) |
| F1_17 - C1_17 - C6_17 | 120.4(18) | F5_19 - C3_19 - C1_19 | 110.0(13) |
| C2_17 - C1_17 - C6_17 | 120.7(15) | F8_19 - C4_19 - F7_19 | 106.1(17) |
| F2_17 - C2_17 - C1_17 | 119.7(17) | F8_19 - C4_19 - F9_19 | 108.6(16) |
| F2_17 - C2_17 - C3_17 | 120.4(17) | F7_19 - C4_19 - F9_19 | 107.5(17) |
| C1_17 - C2_17 - C3_17 | 119.9(15) | F8_19 - C4_19 - C1_19 | 115.6(15) |
| F3_17 - C3_17 - C4_17 | 120.1(17) | F7_19 - C4_19 - C1_19 | 109.9(13) |
| F3_17 - C3_17 - C2_17 | 120.3(17) | F9_19 - C4_19 - C1_19 | 108.8(13) |
| C4_17 - C3_17 - C2_17 | 119.6(15) | C1_20 - O1_20 - Al2   | 148(2)    |
| F4_17 - C4_17 - C3_17 | 119.3(17) | O1_20 - C1_20 - C4_20 | 111.0(15) |
| F4_17 - C4_17 - C5_17 | 120.3(18) | O1_20 - C1_20 - C2_20 | 109.2(16) |
| C3_17 - C4_17 - C5_17 | 120.3(15) | C4_20 - C1_20 - C2_20 | 109.2(12) |
| C6_17 - C5_17 - C4_17 | 120.5(18) | O1_20 - C1_20 - C3_20 | 109.3(16) |
| C5_17 - C6_17 - C1_17 | 119.0(18) | C4_20 - C1_20 - C3_20 | 108.4(12) |

|                       |           |
|-----------------------|-----------|
| C2_20 - C1_20 - C3_20 | 109.7(12) |
| F3_20 - C2_20 - F2_20 | 108.7(15) |
| F3_20 - C2_20 - F1_20 | 105.5(16) |
| F2_20 - C2_20 - F1_20 | 108.8(16) |
| F3_20 - C2_20 - C1_20 | 109.8(13) |
| F2_20 - C2_20 - C1_20 | 112.6(14) |
| F1_20 - C2_20 - C1_20 | 111.2(13) |
| F6_20 - C3_20 - F5_20 | 107.8(17) |
| F6_20 - C3_20 - F4_20 | 108.1(17) |
| F5_20 - C3_20 - F4_20 | 105.8(16) |
| F6_20 - C3_20 - C1_20 | 112.4(14) |
| F5_20 - C3_20 - C1_20 | 110.3(15) |
| F4_20 - C3_20 - C1_20 | 112.2(14) |
| F9_20 - C4_20 - F7_20 | 106.0(18) |
| F9_20 - C4_20 - F8_20 | 107.3(18) |
| F7_20 - C4_20 - F8_20 | 107.5(15) |
| F9_20 - C4_20 - C1_20 | 112.5(16) |
| F7_20 - C4_20 - C1_20 | 110.3(15) |
| F8_20 - C4_20 - C1_20 | 112.8(15) |
| C1_21 - O1_21 - Al1   | 149.9(18) |
| O1_21 - C1_21 - C3_21 | 110.2(13) |
| O1_21 - C1_21 - C4_21 | 112.3(14) |
| C3_21 - C1_21 - C4_21 | 109.4(11) |
| O1_21 - C1_21 - C2_21 | 108.4(13) |
| C3_21 - C1_21 - C2_21 | 108.9(11) |
| C4_21 - C1_21 - C2_21 | 107.6(12) |
| F1_21 - C2_21 - F2_21 | 108.5(16) |
| F1_21 - C2_21 - F3_21 | 106.0(17) |
| F2_21 - C2_21 - F3_21 | 108.4(17) |
| F1_21 - C2_21 - C1_21 | 110.3(14) |
| F2_21 - C2_21 - C1_21 | 111.5(14) |
| F3_21 - C2_21 - C1_21 | 111.8(15) |
| F6_21 - C3_21 - F5_21 | 104.8(16) |
| F6_21 - C3_21 - F4_21 | 107.8(16) |
| F5_21 - C3_21 - F4_21 | 106.4(17) |
| F6_21 - C3_21 - C1_21 | 115.1(15) |
| F5_21 - C3_21 - C1_21 | 111.4(14) |
| F4_21 - C3_21 - C1_21 | 110.9(14) |
| F7_21 - C4_21 - F8_21 | 106.4(16) |
| F7_21 - C4_21 - F9_21 | 107.8(16) |
| F8_21 - C4_21 - F9_21 | 108.1(17) |
| F7_21 - C4_21 - C1_21 | 112.1(14) |
| F8_21 - C4_21 - C1_21 | 111.1(14) |
| F9_21 - C4_21 - C1_21 | 111.2(14) |
| C1_22 - O1_22 - Al1   | 147(3)    |
| O1_22 - C1_22 - C4_22 | 110.8(19) |
| O1_22 - C1_22 - C3_22 | 109.5(19) |
| C4_22 - C1_22 - C3_22 | 110.4(16) |
| O1_22 - C1_22 - C2_22 | 108.4(19) |
| C4_22 - C1_22 - C2_22 | 108.6(15) |
| C3_22 - C1_22 - C2_22 | 109.1(15) |
| F2_22 - C2_22 - F3_22 | 107(2)    |
| F2_22 - C2_22 - F1_22 | 108(2)    |
| F3_22 - C2_22 - F1_22 | 108(2)    |
| F2_22 - C2_22 - C1_22 | 112.2(18) |
| F3_22 - C2_22 - C1_22 | 110.5(18) |

|                       |           |
|-----------------------|-----------|
| F1_22 - C2_22 - C1_22 | 111.0(18) |
| F6_22 - C3_22 - F5_22 | 109(2)    |
| F6_22 - C3_22 - F4_22 | 107(2)    |
| F5_22 - C3_22 - F4_22 | 107(2)    |
| F6_22 - C3_22 - C1_22 | 112.5(19) |
| F5_22 - C3_22 - C1_22 | 110.8(19) |
| F4_22 - C3_22 - C1_22 | 110.2(19) |
| F7_22 - C4_22 - F9_22 | 107(2)    |
| F7_22 - C4_22 - F8_22 | 108(2)    |
| F9_22 - C4_22 - F8_22 | 107(2)    |
| F7_22 - C4_22 - C1_22 | 111.6(19) |
| F9_22 - C4_22 - C1_22 | 110.1(19) |
| F8_22 - C4_22 - C1_22 | 112.6(19) |

Table 3. Torsion angles for pbca\_all\_new\_d-finalcif.cif.

| Atom - Atom - Atom - Atom | Torsion Angle [°] |
|---------------------------|-------------------|
| Al1 - O1_1 - C1_1 - C4_1  | -95(2)            |
| Al1 - O1_1 - C1_1 - C3_1  | 148(2)            |
| Al1 - O1_1 - C1_1 - C2_1  | 28(3)             |
| O1_1 - C1_1 - C2_1 - F3_1 | 40.1(11)          |
| C4_1 - C1_1 - C2_1 - F3_1 | 163.7(8)          |
| C3_1 - C1_1 - C2_1 - F3_1 | -79.1(10)         |
| O1_1 - C1_1 - C2_1 - F2_1 | 160.2(9)          |
| C4_1 - C1_1 - C2_1 - F2_1 | -76.2(9)          |
| C3_1 - C1_1 - C2_1 - F2_1 | 40.9(10)          |
| O1_1 - C1_1 - C2_1 - F1_1 | -79.4(10)         |
| C4_1 - C1_1 - C2_1 - F1_1 | 44.2(10)          |
| C3_1 - C1_1 - C2_1 - F1_1 | 161.3(8)          |
| O1_1 - C1_1 - C3_1 - F4_1 | 40.3(10)          |
| C4_1 - C1_1 - C3_1 - F4_1 | -79.2(9)          |
| C2_1 - C1_1 - C3_1 - F4_1 | 162.8(7)          |
| O1_1 - C1_1 - C3_1 - F6_1 | 161.1(8)          |
| C4_1 - C1_1 - C3_1 - F6_1 | 41.6(9)           |
| C2_1 - C1_1 - C3_1 - F6_1 | -76.4(9)          |
| O1_1 - C1_1 - C3_1 - F5_1 | -78.7(10)         |
| C4_1 - C1_1 - C3_1 - F5_1 | 161.8(8)          |
| C2_1 - C1_1 - C3_1 - F5_1 | 43.8(10)          |
| O1_1 - C1_1 - C4_1 - F8_1 | 167.4(8)          |
| C3_1 - C1_1 - C4_1 - F8_1 | -75.1(9)          |
| C2_1 - C1_1 - C4_1 - F8_1 | 42.7(10)          |
| O1_1 - C1_1 - C4_1 - F9_1 | 47.6(10)          |
| C3_1 - C1_1 - C4_1 - F9_1 | 165.1(8)          |
| C2_1 - C1_1 - C4_1 - F9_1 | -77.1(9)          |
| O1_1 - C1_1 - C4_1 - F7_1 | -72.3(10)         |
| C3_1 - C1_1 - C4_1 - F7_1 | 45.2(10)          |
| C2_1 - C1_1 - C4_1 - F7_1 | 162.9(8)          |
| C6_5 - C1_5 - C2_5 - F2_5 | 178.5(8)          |
| F1_5 - C1_5 - C2_5 - F2_5 | 0.0(12)           |
| C6_5 - C1_5 - C2_5 - C3_5 | -1.0(14)          |
| F1_5 - C1_5 - C2_5 - C3_5 | -179.5(8)         |
| F2_5 - C2_5 - C3_5 - F3_5 | 0.0(13)           |
| C1_5 - C2_5 - C3_5 - F3_5 | 179.5(8)          |
| F2_5 - C2_5 - C3_5 - C4_5 | -178.8(8)         |
| C1_5 - C2_5 - C3_5 - C4_5 | 0.7(14)           |
| F3_5 - C3_5 - C4_5 - F4_5 | 1.4(13)           |



|                               |            |                               |            |
|-------------------------------|------------|-------------------------------|------------|
| C2_5 - C3_5 - C4_5 - F4_5     | -179.8(8)  | C6_13 - C1_13 - C2_13 - F2_13 | -179.4(11) |
| F3_5 - C3_5 - C4_5 - C5_5     | -178.8(8)  | F1_13 - C1_13 - C2_13 - C3_13 | 179.0(11)  |
| C2_5 - C3_5 - C4_5 - C5_5     | 0.0(14)    | C6_13 - C1_13 - C2_13 - C3_13 | 2(2)       |
| F4_5 - C4_5 - C5_5 - C6_5     | 179.4(9)   | F2_13 - C2_13 - C3_13 - F3_13 | 0.2(17)    |
| C3_5 - C4_5 - C5_5 - C6_5     | -0.4(14)   | C1_13 - C2_13 - C3_13 - F3_13 | 179.0(10)  |
| F1_5 - C1_5 - C6_5 - C5_5     | 178.9(8)   | F2_13 - C2_13 - C3_13 - C4_13 | 179.4(10)  |
| C2_5 - C1_5 - C6_5 - C5_5     | 0.5(15)    | C1_13 - C2_13 - C3_13 - C4_13 | -1.8(19)   |
| C4_5 - C5_5 - C6_5 - C1_5     | 0.2(14)    | F3_13 - C3_13 - C4_13 - F4_13 | 0.0(18)    |
| AI2 - O1_15 - C1_15 - C2_15   | 167(3)     | C2_13 - C3_13 - C4_13 - F4_13 | -179.2(12) |
| AI2 - O1_15 - C1_15 - C4_15   | 46(4)      | F3_13 - C3_13 - C4_13 - C5_13 | 179.6(10)  |
| AI2 - O1_15 - C1_15 - C3_15   | -73(4)     | C2_13 - C3_13 - C4_13 - C5_13 | 0.4(19)    |
| O1_15 - C1_15 - C2_15 - F3_15 | 39(2)      | F4_13 - C4_13 - C5_13 - C6_13 | -179.4(13) |
| C4_15 - C1_15 - C2_15 - F3_15 | 162.3(16)  | C3_13 - C4_13 - C5_13 - C6_13 | 1(2)       |
| C3_15 - C1_15 - C2_15 - F3_15 | -78.1(18)  | F1_13 - C1_13 - C6_13 - C5_13 | -177.5(11) |
| O1_15 - C1_15 - C2_15 - F2_15 | 162.3(17)  | C2_13 - C1_13 - C6_13 - C5_13 | 0(2)       |
| C4_15 - C1_15 - C2_15 - F2_15 | -74.3(16)  | C4_13 - C5_13 - C6_13 - C1_13 | -1(2)      |
| C3_15 - C1_15 - C2_15 - F2_15 | 45.3(17)   | AI2 - O1_12 - C1_12 - C3_12   | 49(4)      |
| O1_15 - C1_15 - C2_15 - F1_15 | -80.8(19)  | AI2 - O1_12 - C1_12 - C2_12   | -72(4)     |
| C4_15 - C1_15 - C2_15 - F1_15 | 42.7(18)   | AI2 - O1_12 - C1_12 - C4_12   | 168(3)     |
| C3_15 - C1_15 - C2_15 - F1_15 | 162.2(15)  | O1_12 - C1_12 - C2_12 - F1_12 | -73.0(18)  |
| O1_15 - C1_15 - C3_15 - F6_15 | 169.5(16)  | C3_12 - C1_12 - C2_12 - F1_12 | 166.1(15)  |
| C2_15 - C1_15 - C3_15 - F6_15 | -74.3(17)  | C4_12 - C1_12 - C2_12 - F1_12 | 45.8(18)   |
| C4_15 - C1_15 - C3_15 - F6_15 | 47.1(17)   | O1_12 - C1_12 - C2_12 - F3_12 | 49.1(18)   |
| O1_15 - C1_15 - C3_15 - F5_15 | -68.7(18)  | C3_12 - C1_12 - C2_12 - F3_12 | -71.8(17)  |
| C2_15 - C1_15 - C3_15 - F5_15 | 47.5(17)   | C4_12 - C1_12 - C2_12 - F3_12 | 167.9(15)  |
| C4_15 - C1_15 - C3_15 - F5_15 | 168.9(14)  | O1_12 - C1_12 - C2_12 - F2_12 | 164.8(16)  |
| O1_15 - C1_15 - C3_15 - F4_15 | 47.2(18)   | C3_12 - C1_12 - C2_12 - F2_12 | 44.0(18)   |
| C2_15 - C1_15 - C3_15 - F4_15 | 163.4(14)  | C4_12 - C1_12 - C2_12 - F2_12 | -76.4(17)  |
| C4_15 - C1_15 - C3_15 - F4_15 | -75.2(15)  | O1_12 - C1_12 - C3_12 - F6_12 | 166.9(16)  |
| O1_15 - C1_15 - C4_15 - F9_15 | 32.1(19)   | C2_12 - C1_12 - C3_12 - F6_12 | -70.5(17)  |
| C2_15 - C1_15 - C4_15 - F9_15 | -86.9(15)  | C4_12 - C1_12 - C3_12 - F6_12 | 49.3(17)   |
| C3_15 - C1_15 - C4_15 - F9_15 | 150.6(14)  | O1_12 - C1_12 - C3_12 - F5_12 | -67.9(16)  |
| O1_15 - C1_15 - C4_15 - F8_15 | 158.6(18)  | C2_12 - C1_12 - C3_12 - F5_12 | 54.7(16)   |
| C2_15 - C1_15 - C4_15 - F8_15 | 39.6(18)   | C4_12 - C1_12 - C3_12 - F5_12 | 174.6(13)  |
| C3_15 - C1_15 - C4_15 - F8_15 | -82.8(17)  | O1_12 - C1_12 - C3_12 - F4_12 | 50.1(18)   |
| O1_15 - C1_15 - C4_15 - F7_15 | -79.3(18)  | C2_12 - C1_12 - C3_12 - F4_12 | 172.7(15)  |
| C2_15 - C1_15 - C4_15 - F7_15 | 161.7(13)  | C4_12 - C1_12 - C3_12 - F4_12 | -67.5(17)  |
| C3_15 - C1_15 - C4_15 - F7_15 | 39.2(15)   | O1_12 - C1_12 - C4_12 - F7_12 | -63.7(16)  |
| F1_14 - C1_14 - C2_14 - F2_14 | -0.8(19)   | C3_12 - C1_12 - C4_12 - F7_12 | 55.1(15)   |
| C6_14 - C1_14 - C2_14 - F2_14 | 179.8(12)  | C2_12 - C1_12 - C4_12 - F7_12 | 174.6(13)  |
| F1_14 - C1_14 - C2_14 - C3_14 | -179.8(12) | O1_12 - C1_12 - C4_12 - F8_12 | 176.5(13)  |
| C6_14 - C1_14 - C2_14 - C3_14 | 1(2)       | C3_12 - C1_12 - C4_12 - F8_12 | -64.8(14)  |
| F2_14 - C2_14 - C3_14 - F3_14 | 0(2)       | C2_12 - C1_12 - C4_12 - F8_12 | 54.7(14)   |
| C1_14 - C2_14 - C3_14 - F3_14 | 179.2(12)  | O1_12 - C1_12 - C4_12 - F9_12 | 56.8(16)   |
| F2_14 - C2_14 - C3_14 - C4_14 | -178.9(12) | C3_12 - C1_12 - C4_12 - F9_12 | 175.5(13)  |
| C1_14 - C2_14 - C3_14 - C4_14 | 0(2)       | C2_12 - C1_12 - C4_12 - F9_12 | -65.0(15)  |
| F3_14 - C3_14 - C4_14 - F4_14 | 1(2)       | AI2 - O1_11 - C1_11 - C4_11   | -1(3)      |
| C2_14 - C3_14 - C4_14 - F4_14 | -179.7(12) | AI2 - O1_11 - C1_11 - C3_11   | -120(3)    |
| F3_14 - C3_14 - C4_14 - C5_14 | -179.7(12) | AI2 - O1_11 - C1_11 - C2_11   | 119(2)     |
| C2_14 - C3_14 - C4_14 - C5_14 | -1(2)      | O1_11 - C1_11 - C2_11 - F2_11 | 162.2(14)  |
| F4_14 - C4_14 - C5_14 - C6_14 | 179.3(13)  | C4_11 - C1_11 - C2_11 - F2_11 | -73.6(15)  |
| C3_14 - C4_14 - C5_14 - C6_14 | 0(2)       | C3_11 - C1_11 - C2_11 - F2_11 | 46.0(17)   |
| F1_14 - C1_14 - C6_14 - C5_14 | 179.4(12)  | O1_11 - C1_11 - C2_11 - F3_11 | 48.4(19)   |
| C2_14 - C1_14 - C6_14 - C5_14 | -1(2)      | C4_11 - C1_11 - C2_11 - F3_11 | 172.5(16)  |
| C4_14 - C5_14 - C6_14 - C1_14 | 1(2)       | C3_11 - C1_11 - C2_11 - F3_11 | -67.8(19)  |
| F1_13 - C1_13 - C2_13 - F2_13 | -2.2(17)   | O1_11 - C1_11 - C2_11 - F1_11 | -85.2(17)  |

|                               |            |                           |            |
|-------------------------------|------------|---------------------------|------------|
| C4_11 - C1_11 - C2_11 - F1_11 | 39.0(17)   | O1_9 - C1_9 - C2_9 - F2_9 | -165.8(16) |
| C3_11 - C1_11 - C2_11 - F1_11 | 158.6(15)  | C3_9 - C1_9 - C2_9 - F2_9 | 73.0(17)   |
| O1_11 - C1_11 - C3_11 - F6_11 | 166.4(16)  | C4_9 - C1_9 - C2_9 - F2_9 | -43.9(17)  |
| C4_11 - C1_11 - C3_11 - F6_11 | 43.8(18)   | O1_9 - C1_9 - C2_9 - F1_9 | -50.5(17)  |
| C2_11 - C1_11 - C3_11 - F6_11 | -74.6(18)  | C3_9 - C1_9 - C2_9 - F1_9 | -171.7(14) |
| O1_11 - C1_11 - C3_11 - F5_11 | -70.9(15)  | C4_9 - C1_9 - C2_9 - F1_9 | 71.3(15)   |
| C4_11 - C1_11 - C3_11 - F5_11 | 166.5(14)  | O1_9 - C1_9 - C3_9 - F4_9 | 72.1(18)   |
| C2_11 - C1_11 - C3_11 - F5_11 | 48.1(17)   | C2_9 - C1_9 - C3_9 - F4_9 | -167.0(15) |
| O1_11 - C1_11 - C3_11 - F4_11 | 47.2(16)   | C4_9 - C1_9 - C3_9 - F4_9 | -51.3(18)  |
| C4_11 - C1_11 - C3_11 - F4_11 | -75.4(16)  | O1_9 - C1_9 - C3_9 - F5_9 | -43.2(18)  |
| C2_11 - C1_11 - C3_11 - F4_11 | 166.2(15)  | C2_9 - C1_9 - C3_9 - F5_9 | 77.7(16)   |
| O1_11 - C1_11 - C4_11 - F7_11 | -62.8(16)  | C4_9 - C1_9 - C3_9 - F5_9 | -166.6(14) |
| C3_11 - C1_11 - C4_11 - F7_11 | 53.9(15)   | O1_9 - C1_9 - C3_9 - F6_9 | -164.5(16) |
| C2_11 - C1_11 - C4_11 - F7_11 | 176.0(13)  | C2_9 - C1_9 - C3_9 - F6_9 | -43.6(17)  |
| O1_11 - C1_11 - C4_11 - F9_11 | 55.9(17)   | C4_9 - C1_9 - C3_9 - F6_9 | 72.1(17)   |
| C3_11 - C1_11 - C4_11 - F9_11 | 172.6(14)  | O1_9 - C1_9 - C4_9 - F8_9 | -161.9(16) |
| C2_11 - C1_11 - C4_11 - F9_11 | -65.3(15)  | C3_9 - C1_9 - C4_9 - F8_9 | -38.8(18)  |
| O1_11 - C1_11 - C4_11 - F8_11 | 178.1(14)  | C2_9 - C1_9 - C4_9 - F8_9 | 76.9(16)   |
| C3_11 - C1_11 - C4_11 - F8_11 | -65.2(15)  | O1_9 - C1_9 - C4_9 - F7_9 | -41.6(18)  |
| C2_11 - C1_11 - C4_11 - F8_11 | 56.9(15)   | C3_9 - C1_9 - C4_9 - F7_9 | 81.6(17)   |
| Al2 - O1_10 - C1_10 - C3_10   | -160(2)    | C2_9 - C1_9 - C4_9 - F7_9 | -162.8(15) |
| Al2 - O1_10 - C1_10 - C2_10   | 80(3)      | O1_9 - C1_9 - C4_9 - F9_9 | 79.6(17)   |
| Al2 - O1_10 - C1_10 - C4_10   | -38(3)     | C3_9 - C1_9 - C4_9 - F9_9 | -157.2(15) |
| O1_10 - C1_10 - C2_10 - F2_10 | -160.5(14) | C2_9 - C1_9 - C4_9 - F9_9 | -41.6(17)  |
| C3_10 - C1_10 - C2_10 - F2_10 | 77.1(15)   | Al1 - O1_8 - C1_8 - C2_8  | -153(4)    |
| C4_10 - C1_10 - C2_10 - F2_10 | -41.7(16)  | Al1 - O1_8 - C1_8 - C4_8  | 88(4)      |
| O1_10 - C1_10 - C2_10 - F3_10 | 74.7(15)   | Al1 - O1_8 - C1_8 - C3_8  | -33(4)     |
| C3_10 - C1_10 - C2_10 - F3_10 | -47.7(16)  | O1_8 - C1_8 - C2_8 - F1_8 | -43.2(17)  |
| C4_10 - C1_10 - C2_10 - F3_10 | -166.4(13) | C4_8 - C1_8 - C2_8 - F1_8 | 76.3(16)   |
| O1_10 - C1_10 - C2_10 - F1_10 | -43.4(16)  | C3_8 - C1_8 - C2_8 - F1_8 | -163.6(13) |
| C3_10 - C1_10 - C2_10 - F1_10 | -165.7(13) | O1_8 - C1_8 - C2_8 - F3_8 | 77.8(17)   |
| C4_10 - C1_10 - C2_10 - F1_10 | 75.5(14)   | C4_8 - C1_8 - C2_8 - F3_8 | -162.7(14) |
| O1_10 - C1_10 - C3_10 - F4_10 | 69.0(16)   | C3_8 - C1_8 - C2_8 - F3_8 | -42.6(17)  |
| C2_10 - C1_10 - C3_10 - F4_10 | -170.7(13) | O1_8 - C1_8 - C2_8 - F2_8 | -162.6(15) |
| C4_10 - C1_10 - C3_10 - F4_10 | -53.3(15)  | C4_8 - C1_8 - C2_8 - F2_8 | -43.1(17)  |
| O1_10 - C1_10 - C3_10 - F5_10 | -50.2(16)  | C3_8 - C1_8 - C2_8 - F2_8 | 77.0(16)   |
| C2_10 - C1_10 - C3_10 - F5_10 | 70.1(15)   | O1_8 - C1_8 - C3_8 - F4_8 | 79.2(15)   |
| C4_10 - C1_10 - C3_10 - F5_10 | -172.5(13) | C2_8 - C1_8 - C3_8 - F4_8 | -162.4(13) |
| O1_10 - C1_10 - C3_10 - F6_10 | -168.8(14) | C4_8 - C1_8 - C3_8 - F4_8 | -42.3(15)  |
| C2_10 - C1_10 - C3_10 - F6_10 | -48.5(16)  | O1_8 - C1_8 - C3_8 - F6_8 | -158.4(14) |
| C4_10 - C1_10 - C3_10 - F6_10 | 68.9(16)   | C2_8 - C1_8 - C3_8 - F6_8 | -39.9(16)  |
| O1_10 - C1_10 - C4_10 - F8_10 | -172.2(13) | C4_8 - C1_8 - C3_8 - F6_8 | 80.2(15)   |
| C3_10 - C1_10 - C4_10 - F8_10 | -48.3(15)  | O1_8 - C1_8 - C3_8 - F5_8 | -40.2(18)  |
| C2_10 - C1_10 - C4_10 - F8_10 | 69.4(14)   | C2_8 - C1_8 - C3_8 - F5_8 | 78.3(16)   |
| O1_10 - C1_10 - C4_10 - F9_10 | 66.4(13)   | C4_8 - C1_8 - C3_8 - F5_8 | -161.6(15) |
| C3_10 - C1_10 - C4_10 - F9_10 | -169.7(11) | O1_8 - C1_8 - C4_8 - F7_8 | -42.7(16)  |
| C2_10 - C1_10 - C4_10 - F9_10 | -52.0(13)  | C2_8 - C1_8 - C4_8 - F7_8 | -160.5(13) |
| O1_10 - C1_10 - C4_10 - F7_10 | -49.9(15)  | C3_8 - C1_8 - C4_8 - F7_8 | 79.0(14)   |
| C3_10 - C1_10 - C4_10 - F7_10 | 74.0(14)   | O1_8 - C1_8 - C4_8 - F8_8 | -164.5(15) |
| C2_10 - C1_10 - C4_10 - F7_10 | -168.3(12) | C2_8 - C1_8 - C4_8 - F8_8 | 77.6(16)   |
| Al1 - O1_9 - C1_9 - C3_9      | 177(3)     | C3_8 - C1_8 - C4_8 - F8_8 | -42.8(16)  |
| Al1 - O1_9 - C1_9 - C2_9      | 59(3)      | O1_8 - C1_8 - C4_8 - F9_8 | 74.5(17)   |
| Al1 - O1_9 - C1_9 - C4_9      | -61(3)     | C2_8 - C1_8 - C4_8 - F9_8 | -43.4(17)  |
| O1_9 - C1_9 - C2_9 - F3_9     | 69.4(16)   | C3_8 - C1_8 - C4_8 - F9_8 | -163.9(14) |
| C3_9 - C1_9 - C2_9 - F3_9     | -51.8(15)  | Al1 - O1_7 - C1_7 - C3_7  | -58(4)     |
| C4_9 - C1_9 - C2_9 - F3_9     | -168.8(13) | Al1 - O1_7 - C1_7 - C2_7  | -177(4)    |

|                           |            |                           |            |
|---------------------------|------------|---------------------------|------------|
| AI1 - O1_7 - C1_7 - C4_7  | 64(4)      | C3_4 - C1_4 - C2_4 - F2_4 | 52.2(18)   |
| O1_7 - C1_7 - C2_7 - F3_7 | 45(2)      | O1_4 - C1_4 - C3_4 - F4_4 | 42(2)      |
| C3_7 - C1_7 - C2_7 - F3_7 | -75.7(18)  | C4_4 - C1_4 - C3_4 - F4_4 | -80(2)     |
| C4_7 - C1_7 - C2_7 - F3_7 | 163.4(16)  | C2_4 - C1_4 - C3_4 - F4_4 | 163.5(18)  |
| O1_7 - C1_7 - C2_7 - F2_7 | 167.4(18)  | O1_4 - C1_4 - C3_4 - F6_4 | 162.3(19)  |
| C3_7 - C1_7 - C2_7 - F2_7 | 46.4(17)   | C4_4 - C1_4 - C3_4 - F6_4 | 41(2)      |
| C4_7 - C1_7 - C2_7 - F2_7 | -74.4(17)  | C2_4 - C1_4 - C3_4 - F6_4 | -75.7(19)  |
| O1_7 - C1_7 - C2_7 - F1_7 | -72(2)     | O1_4 - C1_4 - C3_4 - F5_4 | -79.6(19)  |
| C3_7 - C1_7 - C2_7 - F1_7 | 166.7(16)  | C4_4 - C1_4 - C3_4 - F5_4 | 159.3(17)  |
| C4_7 - C1_7 - C2_7 - F1_7 | 45.9(19)   | C2_4 - C1_4 - C3_4 - F5_4 | 42.4(19)   |
| O1_7 - C1_7 - C3_7 - F4_7 | 43(2)      | O1_4 - C1_4 - C4_4 - F8_4 | 169(2)     |
| C2_7 - C1_7 - C3_7 - F4_7 | 159.5(17)  | C3_4 - C1_4 - C4_4 - F8_4 | -70(2)     |
| C4_7 - C1_7 - C3_7 - F4_7 | -79.0(18)  | C2_4 - C1_4 - C4_4 - F8_4 | 46(2)      |
| O1_7 - C1_7 - C3_7 - F6_7 | 165(2)     | O1_4 - C1_4 - C4_4 - F7_4 | -57(2)     |
| C2_7 - C1_7 - C3_7 - F6_7 | -78(2)     | C3_4 - C1_4 - C4_4 - F7_4 | 63.4(19)   |
| C4_7 - C1_7 - C3_7 - F6_7 | 43(2)      | C2_4 - C1_4 - C4_4 - F7_4 | 179.0(16)  |
| O1_7 - C1_7 - C3_7 - F5_7 | -77(2)     | O1_4 - C1_4 - C4_4 - F9_4 | 58(2)      |
| C2_7 - C1_7 - C3_7 - F5_7 | 39.8(19)   | C3_4 - C1_4 - C4_4 - F9_4 | 178.6(18)  |
| C4_7 - C1_7 - C3_7 - F5_7 | 161.3(16)  | C2_4 - C1_4 - C4_4 - F9_4 | -65.7(19)  |
| O1_7 - C1_7 - C4_7 - F8_7 | 160.6(18)  | AI2 - O1_3 - C1_3 - C4_3  | -79(4)     |
| C3_7 - C1_7 - C4_7 - F8_7 | -75.3(18)  | AI2 - O1_3 - C1_3 - C3_3  | 163(4)     |
| C2_7 - C1_7 - C4_7 - F8_7 | 44.8(18)   | AI2 - O1_3 - C1_3 - C2_3  | 43(4)      |
| O1_7 - C1_7 - C4_7 - F9_7 | 39(2)      | O1_3 - C1_3 - C2_3 - F3_3 | 72.5(17)   |
| C3_7 - C1_7 - C4_7 - F9_7 | 162.7(17)  | C4_3 - C1_3 - C2_3 - F3_3 | -166.2(13) |
| C2_7 - C1_7 - C4_7 - F9_7 | -77.2(18)  | C3_3 - C1_3 - C2_3 - F3_3 | -47.9(15)  |
| O1_7 - C1_7 - C4_7 - F7_7 | -80.5(19)  | O1_3 - C1_3 - C2_3 - F2_3 | -167.8(16) |
| C3_7 - C1_7 - C4_7 - F7_7 | 43.6(17)   | C4_3 - C1_3 - C2_3 - F2_3 | -46.5(16)  |
| C2_7 - C1_7 - C4_7 - F7_7 | 163.7(15)  | C3_3 - C1_3 - C2_3 - F2_3 | 71.7(16)   |
| F1_6 - C1_6 - C2_6 - F2_6 | 0.2(17)    | O1_3 - C1_3 - C2_3 - F1_3 | -48.0(17)  |
| C6_6 - C1_6 - C2_6 - F2_6 | 179.2(11)  | C4_3 - C1_3 - C2_3 - F1_3 | 73.3(15)   |
| F1_6 - C1_6 - C2_6 - C3_6 | -179.2(10) | C3_3 - C1_3 - C2_3 - F1_3 | -168.4(13) |
| C6_6 - C1_6 - C2_6 - C3_6 | -0.2(19)   | O1_3 - C1_3 - C3_3 - F5_3 | -48.5(17)  |
| F2_6 - C2_6 - C3_6 - F3_6 | 0.9(17)    | C4_3 - C1_3 - C3_3 - F5_3 | -167.7(14) |
| C1_6 - C2_6 - C3_6 - F3_6 | -179.6(10) | C2_3 - C1_3 - C3_3 - F5_3 | 72.5(15)   |
| F2_6 - C2_6 - C3_6 - C4_6 | 179.9(10)  | O1_3 - C1_3 - C3_3 - F4_3 | 67.2(18)   |
| C1_6 - C2_6 - C3_6 - C4_6 | -0.6(19)   | C4_3 - C1_3 - C3_3 - F4_3 | -52.0(17)  |
| F3_6 - C3_6 - C4_6 - F4_6 | -0.2(17)   | C2_3 - C1_3 - C3_3 - F4_3 | -171.8(14) |
| C2_6 - C3_6 - C4_6 - F4_6 | -179.2(11) | O1_3 - C1_3 - C3_3 - F6_3 | -169.8(15) |
| F3_6 - C3_6 - C4_6 - C5_6 | 179.9(10)  | C4_3 - C1_3 - C3_3 - F6_3 | 71.0(15)   |
| C2_6 - C3_6 - C4_6 - C5_6 | 0.9(18)    | C2_3 - C1_3 - C3_3 - F6_3 | -48.7(15)  |
| F4_6 - C4_6 - C5_6 - C6_6 | 179.9(11)  | O1_3 - C1_3 - C4_3 - F8_3 | -166.8(16) |
| C3_6 - C4_6 - C5_6 - C6_6 | -0.3(18)   | C3_3 - C1_3 - C4_3 - F8_3 | -47.8(17)  |
| C4_6 - C5_6 - C6_6 - C1_6 | -1(2)      | C2_3 - C1_3 - C4_3 - F8_3 | 71.5(16)   |
| F1_6 - C1_6 - C6_6 - C5_6 | 179.8(11)  | O1_3 - C1_3 - C4_3 - F7_3 | -45.7(18)  |
| C2_6 - C1_6 - C6_6 - C5_6 | 1(2)       | C3_3 - C1_3 - C4_3 - F7_3 | 73.3(16)   |
| AI2 - O1_4 - C1_4 - C4_4  | -26(4)     | C2_3 - C1_3 - C4_3 - F7_3 | -167.5(14) |
| AI2 - O1_4 - C1_4 - C3_4  | -148(3)    | O1_3 - C1_3 - C4_3 - F9_3 | 78.3(18)   |
| AI2 - O1_4 - C1_4 - C2_4  | 94(4)      | C3_3 - C1_3 - C4_3 - F9_3 | -162.7(15) |
| O1_4 - C1_4 - C2_4 - F3_4 | 54(2)      | C2_3 - C1_3 - C4_3 - F9_3 | -43.5(17)  |
| C4_4 - C1_4 - C2_4 - F3_4 | 175.1(17)  | AI2 - O1_2 - C1_2 - C4_2  | -5(5)      |
| C3_4 - C1_4 - C2_4 - F3_4 | -65.7(18)  | AI2 - O1_2 - C1_2 - C2_2  | 116(4)     |
| O1_4 - C1_4 - C2_4 - F1_4 | -77.1(19)  | AI2 - O1_2 - C1_2 - C3_2  | -124(4)    |
| C4_4 - C1_4 - C2_4 - F1_4 | 44.5(19)   | O1_2 - C1_2 - C2_2 - F3_2 | 74.5(16)   |
| C3_4 - C1_4 - C2_4 - F1_4 | 163.7(16)  | C4_2 - C1_2 - C2_2 - F3_2 | -163.1(13) |
| O1_4 - C1_4 - C2_4 - F2_4 | 171.4(17)  | C3_2 - C1_2 - C2_2 - F3_2 | -44.2(16)  |
| C4_4 - C1_4 - C2_4 - F2_4 | -67.0(18)  | O1_2 - C1_2 - C2_2 - F2_2 | -166.3(14) |

|                             |            |                               |            |
|-----------------------------|------------|-------------------------------|------------|
| C4_2 - C1_2 - C2_2 - F2_2   | -43.9(15)  | C1_4 - O1_4 - A12 - O1_3      | -166(3)    |
| C3_2 - C1_2 - C2_2 - F2_2   | 75.0(14)   | C1_10 - O1_10 - A12 - O1_11   | 22(3)      |
| O1_2 - C1_2 - C2_2 - F1_2   | -45.1(17)  | C1_10 - O1_10 - A12 - O1_15   | 150(3)     |
| C4_2 - C1_2 - C2_2 - F1_2   | 77.3(15)   | C1_10 - O1_10 - A12 - O1_20   | -87(3)     |
| C3_2 - C1_2 - C2_2 - F1_2   | -163.7(13) | F1_16 - C1_16 - C2_16 - F2_16 | 0(2)       |
| O1_2 - C1_2 - C3_2 - F5_2   | -42.4(15)  | C6_16 - C1_16 - C2_16 - F2_16 | -179.1(13) |
| C4_2 - C1_2 - C3_2 - F5_2   | -163.2(11) | F1_16 - C1_16 - C2_16 - C3_16 | 179.4(13)  |
| C2_2 - C1_2 - C3_2 - F5_2   | 77.9(13)   | C6_16 - C1_16 - C2_16 - C3_16 | 0(2)       |
| O1_2 - C1_2 - C3_2 - F4_2   | 77.1(14)   | F2_16 - C2_16 - C3_16 - F3_16 | -1(2)      |
| C4_2 - C1_2 - C3_2 - F4_2   | -43.8(14)  | C1_16 - C2_16 - C3_16 - F3_16 | 179.9(13)  |
| C2_2 - C1_2 - C3_2 - F4_2   | -162.7(12) | F2_16 - C2_16 - C3_16 - C4_16 | 179.9(13)  |
| O1_2 - C1_2 - C3_2 - F6_2   | -162.4(13) | C1_16 - C2_16 - C3_16 - C4_16 | 1(2)       |
| C4_2 - C1_2 - C3_2 - F6_2   | 76.8(13)   | F3_16 - C3_16 - C4_16 - F4_16 | 0(2)       |
| C2_2 - C1_2 - C3_2 - F6_2   | -42.1(14)  | C2_16 - C3_16 - C4_16 - F4_16 | 179.2(15)  |
| O1_2 - C1_2 - C4_2 - F8_2   | -158.8(13) | F3_16 - C3_16 - C4_16 - C5_16 | 179.9(13)  |
| C2_2 - C1_2 - C4_2 - F8_2   | 79.4(14)   | C2_16 - C3_16 - C4_16 - C5_16 | -1(2)      |
| C3_2 - C1_2 - C4_2 - F8_2   | -40.3(14)  | F4_16 - C4_16 - C5_16 - C6_16 | -179.8(15) |
| O1_2 - C1_2 - C4_2 - F9_2   | 79.4(15)   | C3_16 - C4_16 - C5_16 - C6_16 | 0(2)       |
| C2_2 - C1_2 - C4_2 - F9_2   | -42.4(14)  | F1_16 - C1_16 - C6_16 - C5_16 | -179.9(14) |
| C3_2 - C1_2 - C4_2 - F9_2   | -162.1(12) | C2_16 - C1_16 - C6_16 - C5_16 | -1(2)      |
| O1_2 - C1_2 - C4_2 - F7_2   | -39.4(17)  | C4_16 - C5_16 - C6_16 - C1_16 | 0(2)       |
| C2_2 - C1_2 - C4_2 - F7_2   | -161.2(13) | F1_17 - C1_17 - C2_17 - F2_17 | 0(2)       |
| C3_2 - C1_2 - C4_2 - F7_2   | 79.1(14)   | C6_17 - C1_17 - C2_17 - F2_17 | 179.9(14)  |
| C1_7 - O1_7 - A11 - O1_8    | -135(4)    | F1_17 - C1_17 - C2_17 - C3_17 | -179.8(14) |
| C1_7 - O1_7 - A11 - O1_1    | 112(4)     | C6_17 - C1_17 - C2_17 - C3_17 | 0(3)       |
| C1_7 - O1_7 - A11 - O1_9    | -22(4)     | F2_17 - C2_17 - C3_17 - F3_17 | 0(2)       |
| C1_8 - O1_8 - A11 - O1_7    | 8(4)       | C1_17 - C2_17 - C3_17 - F3_17 | 179.9(14)  |
| C1_8 - O1_8 - A11 - O1_1    | 134(4)     | F2_17 - C2_17 - C3_17 - C4_17 | -179.7(14) |
| C1_8 - O1_8 - A11 - O1_9    | -109(4)    | C1_17 - C2_17 - C3_17 - C4_17 | 0(3)       |
| C1_1 - O1_1 - A11 - O1_7    | -8(3)      | F3_17 - C3_17 - C4_17 - F4_17 | 0(2)       |
| C1_1 - O1_1 - A11 - O1_8    | -128(2)    | C2_17 - C3_17 - C4_17 - F4_17 | -179.8(16) |
| C1_1 - O1_1 - A11 - O1_18   | 104(2)     | F3_17 - C3_17 - C4_17 - C5_17 | -180.0(14) |
| C1_1 - O1_1 - A11 - O1_19   | -129(2)    | C2_17 - C3_17 - C4_17 - C5_17 | 0(3)       |
| C1_1 - O1_1 - A11 - O1_21   | -7(3)      | F4_17 - C4_17 - C5_17 - C6_17 | 179.7(16)  |
| C1_1 - O1_1 - A11 - O1_9    | 125(2)     | C3_17 - C4_17 - C5_17 - C6_17 | 0(3)       |
| C1_1 - O1_1 - A11 - O1_22   | -3(3)      | C4_17 - C5_17 - C6_17 - C1_17 | 0(3)       |
| C1_9 - O1_9 - A11 - O1_7    | 158(3)     | F1_17 - C1_17 - C6_17 - C5_17 | 179.7(14)  |
| C1_9 - O1_9 - A11 - O1_8    | -83(3)     | C2_17 - C1_17 - C6_17 - C5_17 | 0(3)       |
| C1_9 - O1_9 - A11 - O1_1    | 22(3)      | O1_1 - A11 - O1_18 - C1_18    | 96(2)      |
| C1_12 - O1_12 - A12 - O1_2  | 25(4)      | O1_19 - A11 - O1_18 - C1_18   | -34(3)     |
| C1_12 - O1_12 - A12 - O1_3  | -95(3)     | O1_21 - A11 - O1_18 - C1_18   | -156(2)    |
| C1_12 - O1_12 - A12 - O1_4  | 153(3)     | A11 - O1_18 - C1_18 - C3_18   | -47(3)     |
| C1_2 - O1_2 - A12 - O1_12   | -160(4)    | A11 - O1_18 - C1_18 - C4_18   | 75(3)      |
| C1_2 - O1_2 - A12 - O1_3    | -37(5)     | A11 - O1_18 - C1_18 - C2_18   | -165(2)    |
| C1_2 - O1_2 - A12 - O1_4    | 75(5)      | O1_18 - C1_18 - C2_18 - F2_18 | 178.1(16)  |
| C1_11 - O1_11 - A12 - O1_15 | 33(3)      | C3_18 - C1_18 - C2_18 - F2_18 | 58.0(18)   |
| C1_11 - O1_11 - A12 - O1_20 | -83(3)     | C4_18 - C1_18 - C2_18 - F2_18 | -61.4(18)  |
| C1_11 - O1_11 - A12 - O1_10 | 162(2)     | O1_18 - C1_18 - C2_18 - F1_18 | -59.3(19)  |
| C1_15 - O1_15 - A12 - O1_11 | 120(3)     | C3_18 - C1_18 - C2_18 - F1_18 | -179.4(17) |
| C1_15 - O1_15 - A12 - O1_20 | -129(3)    | C4_18 - C1_18 - C2_18 - F1_18 | 61.2(19)   |
| C1_15 - O1_15 - A12 - O1_10 | -6(4)      | O1_18 - C1_18 - C2_18 - F3_18 | 56.9(19)   |
| C1_3 - O1_3 - A12 - O1_12   | -72(4)     | C3_18 - C1_18 - C2_18 - F3_18 | -63.2(19)  |
| C1_3 - O1_3 - A12 - O1_2    | 162(4)     | C4_18 - C1_18 - C2_18 - F3_18 | 177.4(17)  |
| C1_3 - O1_3 - A12 - O1_4    | 43(4)      | O1_18 - C1_18 - C3_18 - F4_18 | 47(2)      |
| C1_4 - O1_4 - A12 - O1_12   | -48(4)     | C4_18 - C1_18 - C3_18 - F4_18 | -75.5(19)  |
| C1_4 - O1_4 - A12 - O1_2    | 81(4)      | C2_18 - C1_18 - C3_18 - F4_18 | 164.5(18)  |

|                               |            |                               |            |
|-------------------------------|------------|-------------------------------|------------|
| O1_18 - C1_18 - C3_18 - F6_18 | 170.1(17)  | C3_20 - C1_20 - C2_20 - F3_20 | -49.0(19)  |
| C4_18 - C1_18 - C3_18 - F6_18 | 47.5(19)   | O1_20 - C1_20 - C2_20 - F2_20 | -167.9(19) |
| C2_18 - C1_18 - C3_18 - F6_18 | -72.5(19)  | C4_20 - C1_20 - C2_20 - F2_20 | -46.4(18)  |
| O1_18 - C1_18 - C3_18 - F5_18 | -70(2)     | C3_20 - C1_20 - C2_20 - F2_20 | 72.3(18)   |
| C4_18 - C1_18 - C3_18 - F5_18 | 167.7(18)  | O1_20 - C1_20 - C2_20 - F1_20 | -45(2)     |
| C2_18 - C1_18 - C3_18 - F5_18 | 48(2)      | C4_20 - C1_20 - C2_20 - F1_20 | 76.0(17)   |
| O1_18 - C1_18 - C4_18 - F9_18 | 43.8(19)   | C3_20 - C1_20 - C2_20 - F1_20 | -165.3(15) |
| C3_18 - C1_18 - C4_18 - F9_18 | 166.8(17)  | O1_20 - C1_20 - C3_20 - F6_20 | -158(2)    |
| C2_18 - C1_18 - C4_18 - F9_18 | -74.5(19)  | C4_20 - C1_20 - C3_20 - F6_20 | 81.4(19)   |
| O1_18 - C1_18 - C4_18 - F8_18 | 162.5(17)  | C2_20 - C1_20 - C3_20 - F6_20 | -38(2)     |
| C3_18 - C1_18 - C4_18 - F8_18 | -74.5(19)  | O1_20 - C1_20 - C3_20 - F5_20 | -37(2)     |
| C2_18 - C1_18 - C4_18 - F8_18 | 44(2)      | C4_20 - C1_20 - C3_20 - F5_20 | -158.3(18) |
| O1_18 - C1_18 - C4_18 - F7_18 | -78.3(17)  | C2_20 - C1_20 - C3_20 - F5_20 | 82.6(19)   |
| C3_18 - C1_18 - C4_18 - F7_18 | 44.7(17)   | O1_20 - C1_20 - C3_20 - F4_20 | 80(2)      |
| C2_18 - C1_18 - C4_18 - F7_18 | 163.5(15)  | C4_20 - C1_20 - C3_20 - F4_20 | -40.6(18)  |
| O1_18 - A11 - O1_19 - C1_19   | 150(3)     | C2_20 - C1_20 - C3_20 - F4_20 | -159.8(16) |
| O1_1 - A11 - O1_19 - C1_19    | 29(3)      | O1_20 - C1_20 - C4_20 - F9_20 | 75(3)      |
| O1_21 - A11 - O1_19 - C1_19   | -89(3)     | C2_20 - C1_20 - C4_20 - F9_20 | -46(2)     |
| A11 - O1_19 - C1_19 - C4_19   | -93(3)     | C3_20 - C1_20 - C4_20 - F9_20 | -165(2)    |
| A11 - O1_19 - C1_19 - C3_19   | 148(3)     | O1_20 - C1_20 - C4_20 - F7_20 | -43(2)     |
| A11 - O1_19 - C1_19 - C2_19   | 30(3)      | C2_20 - C1_20 - C4_20 - F7_20 | -163.8(18) |
| O1_19 - C1_19 - C2_19 - F2_19 | 155.2(17)  | C3_20 - C1_20 - C4_20 - F7_20 | 76.8(19)   |
| C4_19 - C1_19 - C2_19 - F2_19 | -80.3(18)  | O1_20 - C1_20 - C4_20 - F8_20 | -164(2)    |
| C3_19 - C1_19 - C2_19 - F2_19 | 38.6(19)   | C2_20 - C1_20 - C4_20 - F8_20 | 76(2)      |
| O1_19 - C1_19 - C2_19 - F3_19 | 36(2)      | C3_20 - C1_20 - C4_20 - F8_20 | -44(2)     |
| C4_19 - C1_19 - C2_19 - F3_19 | 160.5(18)  | O1_18 - A11 - O1_21 - C1_21   | 63(4)      |
| C3_19 - C1_19 - C2_19 - F3_19 | -80.6(19)  | O1_1 - A11 - O1_21 - C1_21    | 171(4)     |
| O1_19 - C1_19 - C2_19 - F1_19 | -80.4(18)  | O1_19 - A11 - O1_21 - C1_21   | -62(4)     |
| C4_19 - C1_19 - C2_19 - F1_19 | 44.1(18)   | A11 - O1_21 - C1_21 - C3_21   | -13(5)     |
| C3_19 - C1_19 - C2_19 - F1_19 | 163.1(15)  | A11 - O1_21 - C1_21 - C4_21   | 109(4)     |
| O1_19 - C1_19 - C3_19 - F4_19 | 43.7(19)   | A11 - O1_21 - C1_21 - C2_21   | -132(4)    |
| C4_19 - C1_19 - C3_19 - F4_19 | -76.8(17)  | O1_21 - C1_21 - C2_21 - F1_21 | -78(2)     |
| C2_19 - C1_19 - C3_19 - F4_19 | 165.9(15)  | C3_21 - C1_21 - C2_21 - F1_21 | 162.2(16)  |
| O1_19 - C1_19 - C3_19 - F6_19 | 164.7(18)  | C4_21 - C1_21 - C2_21 - F1_21 | 43.7(19)   |
| C4_19 - C1_19 - C3_19 - F6_19 | 44.1(19)   | O1_21 - C1_21 - C2_21 - F2_21 | 161(2)     |
| C2_19 - C1_19 - C3_19 - F6_19 | -73.2(18)  | C3_21 - C1_21 - C2_21 - F2_21 | 42(2)      |
| O1_19 - C1_19 - C3_19 - F5_19 | -76.2(19)  | C4_21 - C1_21 - C2_21 - F2_21 | -76.9(19)  |
| C4_19 - C1_19 - C3_19 - F5_19 | 163.3(17)  | O1_21 - C1_21 - C2_21 - F3_21 | 40(2)      |
| C2_19 - C1_19 - C3_19 - F5_19 | 46.0(19)   | C3_21 - C1_21 - C2_21 - F3_21 | -80.1(18)  |
| O1_19 - C1_19 - C4_19 - F8_19 | 166.3(18)  | C4_21 - C1_21 - C2_21 - F3_21 | 161.5(16)  |
| C3_19 - C1_19 - C4_19 - F8_19 | -77.4(19)  | O1_21 - C1_21 - C3_21 - F6_21 | 163.2(19)  |
| C2_19 - C1_19 - C4_19 - F8_19 | 41(2)      | C4_21 - C1_21 - C3_21 - F6_21 | 39.3(19)   |
| O1_19 - C1_19 - C4_19 - F7_19 | -73.7(18)  | C2_21 - C1_21 - C3_21 - F6_21 | -78.0(19)  |
| C3_19 - C1_19 - C4_19 - F7_19 | 42.6(18)   | O1_21 - C1_21 - C3_21 - F5_21 | -78(2)     |
| C2_19 - C1_19 - C4_19 - F7_19 | 160.6(16)  | C4_21 - C1_21 - C3_21 - F5_21 | 158.3(16)  |
| O1_19 - C1_19 - C4_19 - F9_19 | 43.8(18)   | C2_21 - C1_21 - C3_21 - F5_21 | 41.0(19)   |
| C3_19 - C1_19 - C4_19 - F9_19 | 160.1(15)  | O1_21 - C1_21 - C3_21 - F4_21 | 40(2)      |
| C2_19 - C1_19 - C4_19 - F9_19 | -81.9(16)  | C4_21 - C1_21 - C3_21 - F4_21 | -83.5(19)  |
| O1_11 - A12 - O1_20 - C1_20   | 161(4)     | C2_21 - C1_21 - C3_21 - F4_21 | 159.2(18)  |
| O1_15 - A12 - O1_20 - C1_20   | 42(5)      | O1_21 - C1_21 - C4_21 - F7_21 | 41(2)      |
| O1_10 - A12 - O1_20 - C1_20   | -84(4)     | C3_21 - C1_21 - C4_21 - F7_21 | 164.1(16)  |
| A12 - O1_20 - C1_20 - C4_20   | 61(5)      | C2_21 - C1_21 - C4_21 - F7_21 | -77.8(18)  |
| A12 - O1_20 - C1_20 - C2_20   | -179(4)    | O1_21 - C1_21 - C4_21 - F8_21 | -77.5(19)  |
| A12 - O1_20 - C1_20 - C3_20   | -59(5)     | C3_21 - C1_21 - C4_21 - F8_21 | 45.2(18)   |
| O1_20 - C1_20 - C2_20 - F3_20 | 71(2)      | C2_21 - C1_21 - C4_21 - F8_21 | 163.3(16)  |
| C4_20 - C1_20 - C2_20 - F3_20 | -167.6(16) | O1_21 - C1_21 - C4_21 - F9_21 | 162.0(19)  |

|                               |           |
|-------------------------------|-----------|
| C3_21 - C1_21 - C4_21 - F9_21 | -75.2(19) |
| C2_21 - C1_21 - C4_21 - F9_21 | 42.9(19)  |
| O1_1 - A11 - O1_22 - C1_22    | 157(6)    |
| A11 - O1_22 - C1_22 - C4_22   | 61(7)     |
| A11 - O1_22 - C1_22 - C3_22   | -61(6)    |
| A11 - O1_22 - C1_22 - C2_22   | 180(6)    |
| O1_22 - C1_22 - C2_22 - F2_22 | -161(3)   |
| C4_22 - C1_22 - C2_22 - F2_22 | -40(3)    |
| C3_22 - C1_22 - C2_22 - F2_22 | 80(3)     |
| O1_22 - C1_22 - C2_22 - F3_22 | 80(3)     |
| C4_22 - C1_22 - C2_22 - F3_22 | -160(3)   |
| C3_22 - C1_22 - C2_22 - F3_22 | -39(3)    |
| O1_22 - C1_22 - C2_22 - F1_22 | -40(3)    |
| C4_22 - C1_22 - C2_22 - F1_22 | 80(3)     |
| C3_22 - C1_22 - C2_22 - F1_22 | -159(3)   |
| O1_22 - C1_22 - C3_22 - F6_22 | 73(3)     |
| C4_22 - C1_22 - C3_22 - F6_22 | -49(3)    |
| C2_22 - C1_22 - C3_22 - F6_22 | -168(3)   |
| O1_22 - C1_22 - C3_22 - F5_22 | -164(3)   |
| C4_22 - C1_22 - C3_22 - F5_22 | 74(3)     |
| C2_22 - C1_22 - C3_22 - F5_22 | -46(3)    |
| O1_22 - C1_22 - C3_22 - F4_22 | -46(3)    |
| C4_22 - C1_22 - C3_22 - F4_22 | -168(3)   |
| C2_22 - C1_22 - C3_22 - F4_22 | 72(3)     |
| O1_22 - C1_22 - C4_22 - F7_22 | -44(3)    |
| C3_22 - C1_22 - C4_22 - F7_22 | 78(3)     |
| C2_22 - C1_22 - C4_22 - F7_22 | -163(3)   |
| O1_22 - C1_22 - C4_22 - F9_22 | 75(3)     |
| C3_22 - C1_22 - C4_22 - F9_22 | -164(3)   |
| C2_22 - C1_22 - C4_22 - F9_22 | -44(3)    |
| O1_22 - C1_22 - C4_22 - F8_22 | -166(3)   |
| C3_22 - C1_22 - C4_22 - F8_22 | -44(3)    |
| C2_22 - C1_22 - C4_22 - F8_22 | 75(3)     |

## References

- [1] a) S. C. Meier, A. Holz, A. Schmidt, D. Kratzert, D. Himmel, I. Krossing, *Chem. Eur. J.* **2017**, 23, 14658; b) J. Bohnenberger, W. Feuerstein, D. Himmel, M. Daub, F. Breher, I. Krossing, *Nat. Commun.* **2019**, 10, 624.
- 5 [2] I. Krossing, A. Reisinger, *Coord. Chem. Rev.* **2006**, 250, 2721.
- [3] a) I. Krossing, *Chem. Eur. J.* **2001**, 7, 490; b) I. M. Riddlestone, A. Kraft, J. Schaefer, I. Krossing, *Angew. Chem. Int. Ed.* **2018**, 57, 13982; c) W. A. Herrmann (Ed.) *Synthetic methods of organometallic and inorganic chemistry. Transition Metals*, Thieme, Stuttgart [u.a.], **2000**.
- [4] L. Krause, R. Herbst-Irmer, G. M. Sheldrick, D. Stalke, *J. Appl. Cryst.* **2015**, 48, 3.
- 10 [5] G. M. Sheldrick, *Acta Cryst.* **2008**, 64, 112.
- [6] G. M. Sheldrick, *Acta Cryst. A* **2015**, 71, 3.
- [7] a) D. Kratzert, J. J. Holstein, I. Krossing, *J. Appl. Cryst.* **2015**, 48, 933; b) D. Kratzert, I. Krossing, *J. Appl. Cryst.* **2018**, 51, 928.
- [8] O. V. Dolomanov, L. J. Bourhis, R. J. Gildea, J. A. K. Howard, H. Puschmann, *J. Appl. Cryst.* **2009**, 42, 339.
- 15 [9] a) R. Ahlrichs, M. Bär, M. Häser, H. Horn, C. Kölmel, *Chem. Phys. Lett.* **1989**, 162, 165; b) O. Treutler, R. Ahlrichs, *J. Chem. Phys.* **1995**, 102, 346; c) M. von Arnim, R. Ahlrichs, *J. Comput. Chem.* **1998**, 19, 1746.
- [10] a) Becke, *Phys. Rev. A Gen. Phys.* **1988**, 38, 3098; b) Perdew, *Phys. Rev. , B Condens Matter* **1986**, 33, 8822.
- 20 [11] a) R. Ahlrichs, *Phys. Chem. Chem. Phys.* **2004**, 6, 5119; b) M. Sierka, A. Hogekamp, R. Ahlrichs, *J. Chem. Phys.* **2003**, 118, 9136; c) F. Weigend, *Phys. Chem. Chem. Phys.* **2006**, 8, 1057.
- [12] a) F. Weigend, R. Ahlrichs, *Phys. Chem. Chem. Phys.* **2005**, 7, 3297; b) F. Weigend, M. Häser, H. Patzelt, R. Ahlrichs, *Chem. Phys. Lett.* **1998**, 294, 143.
- 25 [13] a) S. Grimme, J. Antony, S. Ehrlich, H. Krieg, *J. Chem. Phys.* **2010**, 132, 154104; b) S. Grimme, S. Ehrlich, L. Goerigk, *J. Comput. Chem.* **2011**, 32, 1456.
- [14] a) P. Deglmann, F. Furche, *J. Chem. Phys.* **2002**, 117, 9535; b) P. Deglmann, F. Furche, R. Ahlrichs, *Chem. Phys. Lett.* **2002**, 362, 511; c) P. Deglmann, K. May, F. Furche, R. Ahlrichs, *Chem. Phys. Lett.* **2004**, 384, 103.
- 30 [15] R. F. W. Bader, *Chem. Rev.* **1991**, 91, 893.
- [16] T. Lu, F. Chen, *J. Comput. Chem.* **2012**, 33, 580.
